# Supplementary material for: Choice of species affects phylogenetic stability of deep nodes: an empirical example in Terrabacteria
Source: Oxford University Press journal article supplement (doi:10.1093/bioinformatics/btz121), 2019-02-18
Supplement: bioinformatics_35_19_3608_s9.zip [file bioinformatics_35_19_3608_s9.zip]

# Supplementary Information

## 1 Supplemental Methods

### 1.1 Pipeline optimization

The construction of the pipeline used included considerations of computational time and resources available as well as systematic testing of software and parameter options. Preliminary testing and construction was performed on simple random samples of 100 species obtained from a dataset of 714 fully-sequenced Terrabacteria genomes to reduce the computational time of larger reconstruction steps (i.e., orthology detection, substitution matrix and tree estimation). Once the pipeline was established, further testing and parameter exploration was performed using 714 species. Once finalized, we updated our dataset to include fully-sequenced proteomes for the Terrabacteria that have been added to National Center for Biotechnology Information (NCBI) during the construction of the pipeline. Our final dataset consisted of 766 species.

After evaluating the computational requirements of OrthoMCL (Li Li *et al.*, 2003) and ProteinOrtho (Lechner *et al.*, 2011), we found that the algorithm used to evaluate similarity among species based on results of bidirectional blastp scores for ProteinOrtho, at 0 connectivity, was the most appropriate choice for this study based on speed and similarity of results. Once ortholog identification was mapped through ProteinOrtho, a Perl script designed within our lab filtered homologous groups and identified orthologous groups based on a threshold of desired species represented in each ortholog. We tested multiple values (100%, 99%, 97%, 95%, 90%, and 80%) and found that the 90% threshold optimized the number of orthologs and amount of missing data (30 orthologs) (Tables S1 and S2). Each ortholog was aligned using MUSCLE (Edgar, 2004) for multiple sequence alignments under default parameters. We estimated the best substitution model using ProtTest (Darriba *et al.*, 2011) and found that the LG model had the highest AIC across all simple random samples. In order to reduce the presence of missing data, we filtered alignments based on site coverage. The alignments were filtered to exclude columns with more than 25% gaps. After concatenating each individual aligned ortholog we obtained an alignment of 6,227 sites.

**Table S1** Effects of species coverage and connectivity in ProteinOrtho on the the size of the dataset. Based on a dataset of 714 species.

| Sp. filter | Alignment length | Connectivity | Ortholog count |
|------------|------------------|--------------|----------------|
| none       | 5772             | 1            | 6              |
| 100        | 1673             | 0.95         | 21             |
| 99         | 2330             | 0.75         | 29             |
| 97         | 2431             | 0.5          | 35             |
| 95         | 2462             | 0.25         | 53             |
| 90         | 2484             | 0.1          | 58             |
| 80         | 2550             | 0            | 30             |

**Table S2** Orthologs groups and percent of species coverage in alignment with 25% or less gaps per site. Based on a dataset of 766 species.

| Name  | % sp. coverage | Description (NCBI taxon. id: 79880) <sup>a</sup> |
|-------|----------------|--------------------------------------------------|
| OG110 | 90.73          | DNA recombination and repair protein RecF        |
| OG175 | 91.51          | DNA repair protein RecN                          |
| OG678 | 92.29          | Segregation and condensation protein A           |
| OG133 | 93.73          | 16S rRNA processing protein RimM                 |
| OG229 | 94.64          | LSU ribosomal protein L21p                       |
| OG195 | 96.99          | tRNA pseudouridine synthase B                    |
| OG290 | 97.12          | DNA recombination and repair protein RecO        |
| OG244 | 97.25          | Recombination protein RecR                       |
| OG321 | 97.25          | LSU ribosomal protein L9p                        |
| OG333 | 98.3           | Excinuclease ABC subunit B                       |
| OG117 | 98.43          | SSU ribosomal protein S10p (S20e)                |
| OG95  | 98.82          | SSU ribosomal protein S11p (S14e)                |
| OG304 | 98.82          | LSU ribosomal protein L18p (L5e)                 |
| OG306 | 98.82          | LSU ribosomal protein L15p (L27Ae)               |
| OG296 | 99.21          | LSU ribosomal protein L22p (L17e)                |
| OG298 | 99.34          | LSU ribosomal protein L16p (L10e)                |
| OG179 | 99.6           | LSU ribosomal protein L19p                       |
| OG183 | 99.6           | LSU ribosomal protein L10p (P0)                  |
| OG217 | 99.6           | Translation elongation factor Ts                 |
| OG218 | 99.6           | SSU ribosomal protein S2p (SAe)                  |
| OG295 | 99.6           | LSU ribosomal protein L2p (L8e)                  |
| OG302 | 99.6           | SSU ribosomal protein S8p (S15Ae)                |
| OG96  | 99.73          | SSU ribosomal protein S13p (S18e)                |
| OG182 | 99.73          | LSU ribosomal protein L1p (L10Ae)                |
| OG294 | 99.73          | LSU ribosomal protein L4p (L1e)                  |
| OG293 | 99.86          | LSU ribosomal protein L3p (L3e)                  |
| OG303 | 99.86          | LSU ribosomal protein L6p (L9e)                  |
| OG305 | 99.86          | SSU ribosomal protein S5p (S2e)                  |
| OG297 | 100            | SSU ribosomal protein S3p (S3e)                  |
| OG93  | 99.08          | LSU ribosomal protein L17p                       |

<sup>a</sup>gene descriptions based on *Bacillus clausii*.

## 1.2 Alternative Maximum Likelihood (ML) estimation methods

Initially, we considered commonly used RaxML (Stamatakis, 2006), and FastTree (Price *et al.*, 2010) software to construct Maximum-Likelihood phylogenetic trees. FastTree was able to estimate phylogenies for large datasets in a fraction of the time that RaxML required, with comparable likelihoods & topology results (Liu *et al.*, 2011). Therefore, using FastTree instead of RaxML in our pipeline allowed the large-scale production of trees required to perform the planned permutations on taxon sampling. However, FastTree did not have the appropriate

substitution model estimated for our dataset (LG) so we altered the software to include the LG substitution matrix and sent the modified software to the authors for verification. Ultimately, our matrix was accepted and implemented in the subsequent versions of the software (version 2.1.9: March 29, 2016).

The recent widespread use of IQ-Tree (Nguyen *et al.*, 2014; Zhou *et al.*, 2017) as a fast phylogenetic tree-building method prompted a re-analysis of some of our datasets to compare the results with those obtained by FastTree. These analyses were completed manually as IQ-Tree is not implemented yet in our pipeline. The repeated analyses include (i). each permutation scenario (DT, CHF, ACT) under HIGH and LOW sampling and (ii.) ACT permutations scenarios under MID random sampling scenarios. These are the analyses that show the strongest trends in FastTree and, therefore, the best candidates for a re-analysis with IQ-Tree. Just as with the products of FastTree, all trees were analyzed for the discordance produced on both the internal node level as well as at the backbone level (for results see below, Supplementary Results, section 2.1).

### 1.3 Sampling & permutation scenario example

While a simulation approach would have allowed to fully control variables, it is limited in the complexity of the evolutionary processes that can be modeled. For example, horizontally transferred genes and long-branch attraction are known to affect phylogenetic accuracy but the relative effect they have on a phylogeny are not well understood. Modeling these phenomena under a variety of conditions would be computationally taxing as it would exponentially increase the numbers of scenarios and permutations to explore. Instead, we chose to use empirical data that implicitly already includes this information and compare the effect of taxon resampling on phylogenetic accuracy within a relative framework (total # of trees produced: > 1960). In other words, all our permutations share the same potential confounding factors that may be affecting phylogenetic reconstruction so that the only variable changing is the number of species representing each phylum and the weight of these confounding factors that each species carries within its genome.

Thus, using empirical data, we implemented different sampling scenarios to an alignment by removing a set number of taxa for a chosen phylum (e.g., *Deinococcus-Thermus*) without altering the number of species present in other phyla. We tested three sampling scenarios representing LOW, HIGH and MID level sampling for a given phylum. Within each scenario, all species for a single phylum are then permuted to determine if a specific lineage is more likely to influence the accuracy of phylogenetic reconstruction than others. Under MID level sampling we also explored the possibility that if a set of closely related species (e.g., a monophyletic genus) is chosen instead of a set of randomly selected species the topology might be affected. Thus, we created two MID level sampling scenarios, one ancestry-based (MIDanc) and another, randomly-based (MIDran) that uses the same number of species from MIDanc but performs 20 iterations using randomly selected species.

For example, consider a phylum represented by six species belonging to two different classes (one containing two species and the other containing four species). In the LOW scenario, the resulting permutations create 6 phylogenetic trees each with only one of the six species available for that phylum. Under HIGH sampling, again 6 trees will be created each with five of the six species available. Using this hypothetical example for MID sampling, 2 trees will be created each with the representative species for one of the two classes for the MIDanc scenario. The same number of species used for MIDanc (two and four) would be randomly selected from six species and repeated 20 times resulting in a total of 40 (20 with two species kept and 20 with four species kept) to obtain the trees produced in the MIDran scenario.

#### 1.4 Orthology & alignment length investigation

The length of an alignment is known to contribute to phylogenetic accuracy (Som, 2014). In our experimental design changes in alignment length can be caused by two factors: first, when the number of species retained is smaller there is a possibility that the number of orthologs may increase thus increasing the alignment length; second, different species sets can alter the number of gaps in the alignment, with higher gaps more likely to decrease the accuracy of phylogenetic reconstructions. To account for these variables, using *Deinococcus-Thermus* (DT) permutations under the LOW sampling scenario, we reduced the dataset at the start of the pipeline and reran ProteinOrtho (Lechner *et al.*, 2011) (Fig. 2: green box). We found that under the same parameters, reducing the dataset, from 766 species (FULL) to 747 species (DT: LOW), the number of orthologs we obtained increased by one (from 30 (FULL) to 31) in 19 of the 20 trees, resulting in an average 11% (10.57-11.16%) difference in alignment length (Table S3). *Marinithermus hydrothermalis* was the exception with only 0.21% difference (Table 3). If the number of orthologs increased, we then performed a bootstrap analysis to reduce the alignment length to the same number of sites (6,227) as the original concatenation. Fifty bootstrap iterations (bp) were performed for each permutation from which a majority-rule consensus tree (bp consensus tree) was estimated using IQ-TREE (Nguyen *et al.*, 2014).

We compared the backbones of permutation trees produced with the additional orthologs (re-ortholog trees) to the original DT trees produced under LOW sampling using the orthologs obtained from the full dataset (original trees) to evaluate if the change in orthologs would produce different backbone phylogenies. We found that in 60% of the trees with the additional ortholog, and thus longer alignment length, there was no difference in the backbone topology produced (Table S4). We also compared the bp consensus trees to the re-ortholog trees to see if the composition of the randomly selected sites that remained in the bootstrapped alignment affected the phylogeny of the backbone produced. In 80% of permutations, reducing the length of the alignment had no effect on the phylogeny produced (Table S4). Overall, altering the number of orthologs and/or the alignment length has no effect on the topology produced in 55% of the cases (Table S4) (e.g., Tree C before and after the change in variables stays the same). In the remaining 45% of the cases, the topology switched between Trees B, C, and D.

**Table S3** Ortholog group re-sampling results. Difference observed when Deinococcus-Thermus permutations under LOW sampling were altered at the start of the pipeline as opposed to altering the supermatrix. Differences are obtained through comparison with the result of the full dataset (30 orthologs, 6227 sites). Dcc.: Deinococcus, Th.: Thermus.

| Species                  | Orthologs | Alignment length | Site diff. | % diff. |
|--------------------------|-----------|------------------|------------|---------|
| Dcc. actinosclerus       | 31        | 6948             | 721        | 10.94   |
| Dcc. deserti             | 31        | 6916             | 689        | 10.48   |
| Dcc. geothermalis        | 31        | 6922             | 695        | 10.57   |
| Dcc. gobiensis           | 31        | 6914             | 687        | 10.46   |
| Dcc. maricopensis        | 31        | 6936             | 709        | 10.77   |
| Dcc. peraridilitoris     | 31        | 6941             | 714        | 10.84   |
| Dcc. proteolyticus       | 31        | 6935             | 708        | 10.76   |
| Dcc. radiodurans         | 31        | 6938             | 711        | 10.80   |
| Dcc. soli                | 31        | 6936             | 709        | 10.77   |
| Dcc. swuensis            | 31        | 6938             | 711        | 10.80   |
| Marinith. hydrothermalis | 30        | 6240             | 13         | 0.21    |
| Meioth. silvanus         | 31        | 6942             | 715        | 10.86   |
| Oceanith. profundus      | 31        | 6949             | 722        | 10.96   |
| Th. aquaticus            | 31        | 6936             | 709        | 10.77   |
| Th. oshimai              | 31        | 6939             | 712        | 10.82   |
| Th. parvatiensis         | 31        | 6944             | 717        | 10.89   |
| Th. scotoductus          | 31        | 6944             | 717        | 10.89   |
| Th. sp. CCB              | 31        | 6935             | 708        | 10.76   |
| Th. thermophilus         | 31        | 6963             | 736        | 11.16   |
| Truepera radiovictrix    | 31        | 6938             | 711        | 10.80   |
| Average                  | 31        | 6903             | 676        | 10.27   |
| Stardard deviation       | 0.22      | 156              | 675        | 10.25   |

**Table S4** Backbone topology resulting from resampling of orthologs based on those presented in Figure 5, obtained under LOW sampling for Deinococcus-Thermus phylum permutations as explained in section 3.4 of main text. Consensus trees were generated from 50 bootstraps (bp) based on majority rule consensus. Dcc.: Deinococcus, Th.: Thermus.

| Species                  | original | re-ortholog | bp consensus |
|--------------------------|----------|-------------|--------------|
| Dcc. actinosclerus       | tree C   | tree C      | tree C       |
| Dcc. deserti             | tree B   | tree C      | tree C       |
| Dcc. geothermalis        | tree B   | tree C      | tree C       |
| Dcc. gobiensis           | tree C   | tree C      | tree C       |
| Dcc. maricopensis        | tree C   | tree C      | tree D       |
| Dcc. peraridilitoris     | tree B   | tree C      | tree C       |
| Dcc. proteolyticus       | tree B   | tree C      | tree C       |
| Dcc. radiodurans         | tree C   | tree C      | tree C       |
| Dcc. soli                | tree C   | tree B      | tree C       |
| Dcc. swuensis            | tree C   | tree C      | tree C       |
| Marinith. hydrothermalis | tree C   | tree C      | tree C       |
| Meioth. silvanus         | tree D   | tree C      | tree C       |
| Oceanith. profundus      | tree C   | tree C      | tree C       |
| Th. aquaticus            | tree C   | tree C      | tree C       |
| Th. oshimai              | tree C   | tree B      | tree C       |
| Th. parvatiensis         | tree C   | tree C      | tree C       |
| Th. scotoductus          | tree C   | tree C      | tree C       |
| Th. sp. CCB              | tree C   | tree C      | tree C       |
| Th. thermophilus         | tree C   | tree C      | tree C       |
| Truepera radiovictrix    | tree B   | tree C      | tree D       |

### 1.5 Hug et al. (2016) Deinococcus-Thermus permutations

Using the 3083 species concatenated ribosomal protein alignment provided by Hug et al. (2016), we implemented our methods, using the same software and parameters, for the 6 Deinococcus-Thermus (DT) species (*Deinococcus geothermalis*, *Truepera radiovictrix*, *Meiothermus ruber*, *Thermus oshimai*, *Marinithermus hydrothermalis*, *Oceanithermus profundus*) in the alignment. We also re-analyzed our own 766 species dataset after eliminating all DT species except for the 6 used in the Hug et al. study. Resulting trees from both re-analyses were compared to obtain the normalized Robinson-Foulds metric (Table S23 and Table S24, respectively).

## 2. Supplemental Results

### 2.1 IQ-TREE vs FastTree

In addition to estimating the FULL (766 species) dataset using IQ-TREE (Nguyen *et al.*, 2014), we also reanalyzed 100% of our alignments under various sampling scenarios for each of the three phyla analyzed (DT, CHF, ACT). We then analyzed all IQ-Tree results following the same methodology used for the FastTree results. The FULL tree produced by IQ-TREE differed from the tree produced by FastTree in 122 branches ( $nRF > 0.08$ ) and resulted in backbone tree B (as shown in Fig. 6 of main text).

Comparing permuted trees produced from IQ-TREE under LOW and HIGH sampling showed much higher discordance ( $> 3x$ ) among the internal nodes than trees produced by FastTree across all three phyla (Table 5). The results of the backbone frequency recovered using FastTree showed consistency in HIGH sampling always recovering the same backbone as the FULL phylogeny but LOW sampling resulted in high variance among backbones reconstructed. IQ-TREE also recovered the reference trees for all trees produced under HIGH sampling and showed more variance among LOW permutations, although in 50% of the cases for DT it reconstructed the FULL tree topology (table 6).

Although nearly 95% of the IQ-Tree trees produced topologies shown in Fig. 6a in the main text, 6 of the 108 trees produced were unique. Keeping *Thermus parvatiensis* as the only DT representative resulted in a backbone topology similar to tree C except that this species grouped between *Coprothermobacter proteolyticus* (CTP) and *Thermodesulfobium narugense* (TSN) (referred to as tree C\*). The other 5 trees resulted from LOW permutations within Chloroflexi. Four permutations showed a topology where the permuted species grouped with CTP/TSN and placed the rest of the Firmicutes and Tenericutes with the sister clade of Actinobacteria and Deinococcus-Thermus (Tree H: add the newick style backbone tree here). Keeping only *Roseiflexus castenholzii* resulted in the last unique topology which is similar to the topology shown in tree E but CHF and FT branches are flipped (tree I: add nwk backbone tree). Surprisingly, 90% of the permutations of Actinobacteria under LOW sampling recovered the reference tree (tree B) and in only 2 of the 20 samples was tree A recovered instead.

**Table S5** Summary of normalized Robinson-Foulds (nRF) scores produced for each phylum analyzed (DT: Deinococcus-Thermus, CHF: Chloroflexi, ACT: Actinobacteria) for a given sampling scenario (HIGH or LOW).

|          |                | DT    |       | CHF   |       | ACT   |       |
|----------|----------------|-------|-------|-------|-------|-------|-------|
|          |                | HIGH  | LOW   | HIGH  | LOW   | HIGH  | LOW   |
| FastTree | $\Sigma nRF$   | 0.538 | 2.202 | 0.423 | 0.741 | 0.974 | 1.327 |
|          | $\mu_{nRF}$    | 0.027 | 0.110 | 0.030 | 0.053 | 0.049 | 0.066 |
|          | $\sigma_{nRF}$ | 0.011 | 0.077 | 0.018 | 0.020 | 0.025 | 0.028 |
| IQ-TREE  | $\Sigma nRF$   | 7.160 | 8.546 | 2.619 | 3.845 | 4.141 | 3.437 |
|          | $\mu_{nRF}$    | 0.358 | 0.427 | 0.187 | 0.275 | 0.207 | 0.172 |
|          | $\sigma_{nRF}$ | 0.079 | 0.107 | 0.046 | 0.049 | 0.049 | 0.042 |

**Table S6** Backbone topology produced for Deinococcus-Thermus (left) and Chloroflexi (right) permutations under LOW sampling scenario (\* denotes paraphyletic CTP/TSN).

|                                        | FastTree | IQ-TREE |                                              | FastTree | IQ-TREE |
|----------------------------------------|----------|---------|----------------------------------------------|----------|---------|
| Deinococcus_actinosclerus              | C        | D       | Anaerolinea_thermophila_UNI-1                | E        | H       |
| Deinococcus_deserti_VCD115             | B        | B       | Caldiilinea_aerophila_DSM_14535__NBRC_104270 | F        | F       |
| Deinococcus_geothermalis_DSM_11300     | B        | B       | Chloroflexus_aggregans_DSM_9485              | F        | F       |
| Deinococcus_gobiensis_I-0              | C        | B       | Chloroflexus_aurantiacus_J-10-fl             | F        | F       |
| Deinococcus_maricopensis_DSM_21211     | C        | B       | Chloroflexus_sp._Y-400-fl                    | F        | F       |
| Deinococcus_peraridilitoris_DSM_19664  | B        | B       | Dehalococcoides_mccartyi_195                 | B        | H       |
| Deinococcus_proteolyticus_MRP          | B        | B       | Dehalococcoides_sp._UCH007                   | B        | H       |
| Deinococcus_radiodurans_R1             | C        | B       | Dehalogenimonas_lykanthroporepellens_BL-DC-9 | F        | F       |
| Deinococcus_soli__Cha_et_al            | C        | B       | Dehalogenimonas_sp._WBC-2                    | B        | B       |
| Deinococcus_swuensis                   | C        | B       | Herpetosiphon_aurantiacus_DSM_785            | F        | F       |
| Marinithermus_hydrothermalis_DSM_14884 | C        | A       | Roseiflexus_castenholzii_DSM_13941           | F        | I       |
| Meiothermus_silvanus_DSM_9946          | D        | C       | Roseiflexus_sp._RS-1                         | F        | B       |
| Oceanithermus_profundus_DSM_14977      | C        | A       | Sphaerobacter_thermophilus_DSM_20745         | F        | F       |
| Thermus_aquaticus_Y51MC23              | C        | A       | Thermomicrobium_roseum_DSM_5159              | F        | H       |
| Thermus_oshimai_JL-2                   | C        | C       |                                              |          |         |
| Thermus_parvatiensis                   | C        | C*      |                                              |          |         |
| Thermus_scutoductus_SA-01              | C        | A       |                                              |          |         |
| Thermus_sp                             | C        | C       |                                              |          |         |
| Thermus_thermophilus_JL-18             | C        | A       |                                              |          |         |
| Truepera_radiovictrix_DSM_17093        | B        | B       |                                              |          |         |

We also compared the results of trees produced by MID sampling using randomly selected species (MIDran) for FastTree to trees produced in the same way by IQ-TREE. Again, among the internal nodes within Actinobacteria, overall we found that FastTree averaged lower nRF scores than IQ-TREE (Table S7), however the differences were not as extreme as seen among trees under HIGH and LOW sampling (Table S5). Further, the results of backbone show higher consistency under IQ-TREE with at least 90% of the trees recovering the same backbone as the FULL tree (Table S8).

**Table S7** Summary of normalized Robinson-Foulds (nRF) scores produced for Actinobacteria (ACT) permutations under MIDran sampling using 20 replicates of randomly selected species. The number of species kept is shown in each column.

|          |                | ACT   |       |       |       |       |
|----------|----------------|-------|-------|-------|-------|-------|
|          |                | 86    | 32    | 19    | 17    | 10    |
| FastTree | $\sum nRF$     | 2.445 | 4.060 | 3.230 | 2.509 | 1.161 |
|          | $\mu_{nRF}$    | 0.122 | 0.203 | 0.162 | 0.125 | 0.058 |
|          | $\sigma_{nRF}$ | 0.044 | 0.104 | 0.060 | 0.046 | 0.045 |
| IQ-TREE  | $\sum nRF$     | 3.808 | 4.792 | 3.520 | 2.753 | 3.102 |
|          | $\mu_{nRF}$    | 0.190 | 0.240 | 0.176 | 0.138 | 0.155 |
|          | $\sigma_{nRF}$ | 0.051 | 0.057 | 0.047 | 0.046 | 0.087 |



**Table S8** Backbone topology produced by Actinobacteria (ACT) permutations under MID sampling using 20 replicates of randomly selected species. The number of species kept is shown for each column.

|          |       | ACT  |      |      |      |      |
|----------|-------|------|------|------|------|------|
|          |       | 86   | 32   | 19   | 17   | 10   |
| FastTree | treeA | 0.75 | 0.45 | 0.3  | 0.3  | 0.1  |
|          | treeB | 0.25 | 0.4  | 0.6  | 0.55 | 0.9  |
|          | treeC |      | 0.1  | 0.1  | 0.1  |      |
|          | treeD |      | 0.05 |      |      |      |
|          | treeE |      |      |      |      |      |
|          | treeF |      |      |      | 0.05 |      |
| IQ-TREE  | treeA | 0.1  | 0.05 | 0.05 | 0.1  |      |
|          | treeB | 0.9  | 0.95 | 0.95 | 0.9  | 0.95 |
|          | treeC |      |      |      |      |      |
|          | treeD |      |      |      |      | 0.05 |
|          | treeE |      |      |      |      |      |
|          | treeF |      |      |      |      |      |

Overall, the results from IQ-Tree and FastTree produce a similar trend that shows multiple topologies obtained by datasets with few species (LOW sampling) and with different species identities (permutations of LOW sampling). However, IQ-Tree shows higher internal consistency (i.e., fewer topologies) when only the backbone is analyzed but lower consistency when all internal nodes are compared (higher nRF values) relative to FastTree. The reasons for the different behavior of IQ-Tree between backbone and internal nodes are unknown and will be investigated in the future. Nonetheless, despite this, we did not find FastTree and IQ-Tree to be significantly different in the general trends produced, as has been suggested before (e.g., Lees, *et al.*, 2018; Parks, *et al.*, 2018).

## 2.2 MID sampling scenario: ancestry versus control

There were two scenarios considered under MID sampling. The first was a scenario driven by the ancestry of the species within a given phylum (MIDanc), the second acted as a control to this scenario where species were chosen randomly (MIDran) (details given in main text and supplemental methods section 1.3). Twenty random samples (MIDran) were created for each MIDanc permutation within Actinobacteria (ACT) and Deinococcus-Thermus (DT); Chloroflexi was not included for saturation concerns due to the low number of species (two or three) kept for each MIDanc permutation.

To analyze discord within internal nodes, we evaluated the average discord produced from two samples within the 20 randomly sampled trees for a given scenario and compared that to the discord produced from the same two scenarios within the ancestry driven sample. For example, within Deinococcus-Thermus there were only two MID scenarios: one where we kept 10 species belonging to the Deinococcus genus (DT10) and another where we kept 6 species belonging to the Thermus genus (DT6). Within MIDran, we assessed the nRF of the 20 trees for each DT10 and DT6 and compared the average of discord produced to the discord produced from the two MIDanc trees. Results from DT and ACT are opposite: in DT, MIDran trees had lower average discord (nRF=0.0033) than the discord produced between the MIDanc trees (nRF=0.0094); in ACT, the majority of the comparisons shows higher discord for MIDran (Supplementary Material, Fig.1). These opposite results are likely to represent a saturation effect within DT given the small number of species to select from for the MIDran scenario. Thus, results from ACT are likely to be more informative.

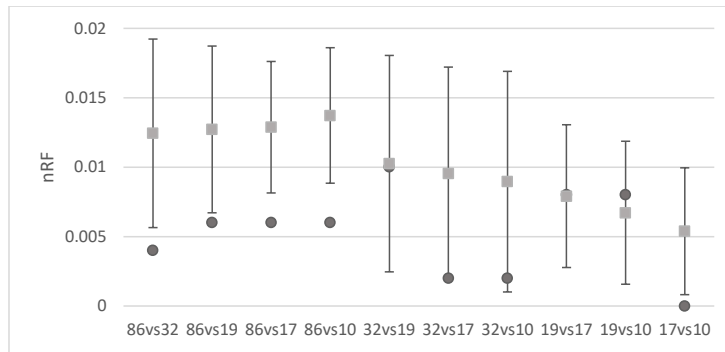

**Figure S1** Normalized Robinson-Foulds (nRF) scores produced from MID level sampling in ACT. Ancestry driven nRF values (MIDanc: totals between two trees shown in dark grey circles) are compared to those from randomly sampled datasets (MIDran: averages from 40 trees shown in light grey squares with error bars showing standard deviation).

At the backbone level, we see that the selection of species based on ancestry is less likely to produce stable topologies (compare results from Fig. 7a in the main text and Fig. S2). This is especially true within DT permutations where not only did both ancestry trees, DT10 and DT6, differ from the reference tree (i.e., FULL: tree A) but they differed between each other. However, within the randomly sampled trees, not only are the majority of the trees produced in agreement with each other, they are also consistently recovering the reference tree (Fig. S2: red bars). Within Actinobacteria, although we see more disagreement among the topologies, the reference tree is recovered especially in samples that have higher number of species kept (Fig. S2: purple bars).

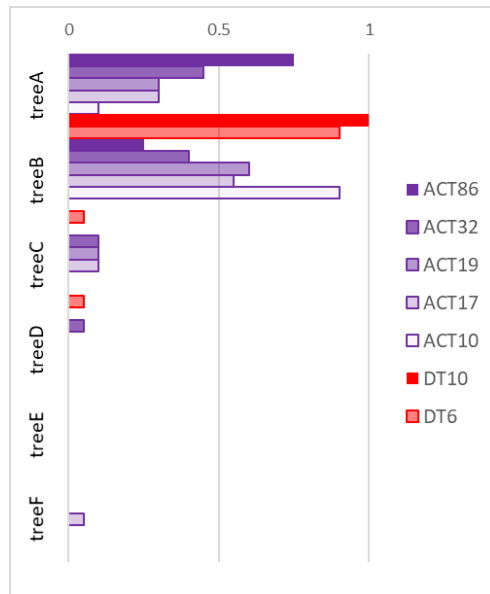

**Figure S2** Backbone frequency results for MID random sampling scenario. Trees A-F as shown in figure 5 of main text.

#### 2.4 CTP/TSN investigation

To test the influence of *Coprothermobacter proteolyticus* (CTP) and *Thermodesulfobium narugense* (TSN) independently, we repeated our reconstruction methods with both CTP and TSN removed, as well as removing one of them at a time. We then reran our pipeline for each phylum permutation in small groups (Deinococcus-Thermus and Chloroflexi) and for 5 permutations of each sampling scenario in the large group (Actinobacteria). We found that removing both CTP and TSN or excluding CTP only produced different backbone topologies. When we kept in CTP and excluded TSN we found all phyla and sampling scenarios resulted in the same backbone topology as our FULL dataset (tree A in Fig 3 in the main text). While the other two cases yielded different results depending on the phylum permuted, specifically, iterations within our sampling scenarios for Chloroflexi different then the results of backbone topologies produced from permutations within Deinococcus-Thermus and Actinobacteria.

When we removed CTP and TSN all scenarios resulted in the same backbone topology as tree A if the branch containing CTP/TSN was simply pruned (i.e., Tree D in Fig 6a and Tree X in Fig. 6b in the main text). While Chloroflexi also recovered that topology under HIGH sampling, all permutations in MID and LOW sampling recovered Tree Z. Similarly, when we removed CTP and kept TSN, all trees recovered the same topology as Tree B except for permutations of Chloroflexi under MID and LOW sampling. For the majority of these Chloroflexi permutations under LOW and MID sampling, Tree E was recovered (8/14 and 3/4, respectively). Tree B was recovered for the other permutation in MID sampling and for 3 more permutations in LOW sampling. Interestingly, in the remaining 3 of the 14 Chloroflexi permutations under LOW sampling, a new topology was recovered which places Firmicutes/Tenericutes basal to the other ingroup phyla and places Chloroflexi as a sister clade to Deinococcus-Thermus and Actinobacteria. Taken together these results show that these two species exert a strong influence on the overall backbone topology of the Terrabacteria, especially Chloroflexi species

when alternatively sampled, a result that is unexpected from species that have been classified as part of a well-sampled group.

### 2.5 Other sources of bias: amino acids and branch lengths

Following our results, we investigated some of the possible causes of the phylogenetic instability, specifically number of genes used in the alignment (see Supplemental section 1.4) and compositional bias. Previous literature has attempted to identify the proportional weight that these factors have on phylogenetic instability and found that the level of incongruence that is caused is highly dependent on the data used (e.g., Reddy *et al.*, 2017). For example, several studies that have attempted to resolve deep animal relationship have shown that, despite the implementation of the same approach, the number of genes required for congruence differs based on the dataset (Philippe *et al.*, 2011).

To evaluate possible differences seen within amino acid usage of species, we calculated averages and standard deviations of the amino acids in each lineage. Species with an average amino acid usage within one standard deviation of the average of the total dataset were considered unbiased. We repeated this analysis for each ortholog separately and found no gene-specific difference in this trend. In particular, species that produced different phylogenies did not show to have a significantly different compositional bias compared to the other species in the phylum and across the phylogeny (Supplementary Fig. S3). Additionally, we considered the effect that changes in branch lengths might have on the backbone phylogeny when different species are selected, we used an R script to extract branch length for 119 trees and make statistical comparisons (e.g., pairwise distances) (Table S9). Overall, we found one species, within *Deinococcus-Thermus*, *Marinithermus hydrothermalis*, that had much smaller branch lengths (0.197) compared to other species (average: 0.592). However, this species was not identified as problematic through our Robinson-Foulds analysis (Fig. 5).

Neither of the factors we individually analyzed seems to be directly correlated with the species that produce different phylogenetic signals, which suggests that other factors might be disproportionately affecting tree reconstruction when these species are used (Philippe *et al.*, 2011). Thus, these species should be further investigated to determine their effect on reconstructed phylogenies, especially if they are used in small clades.

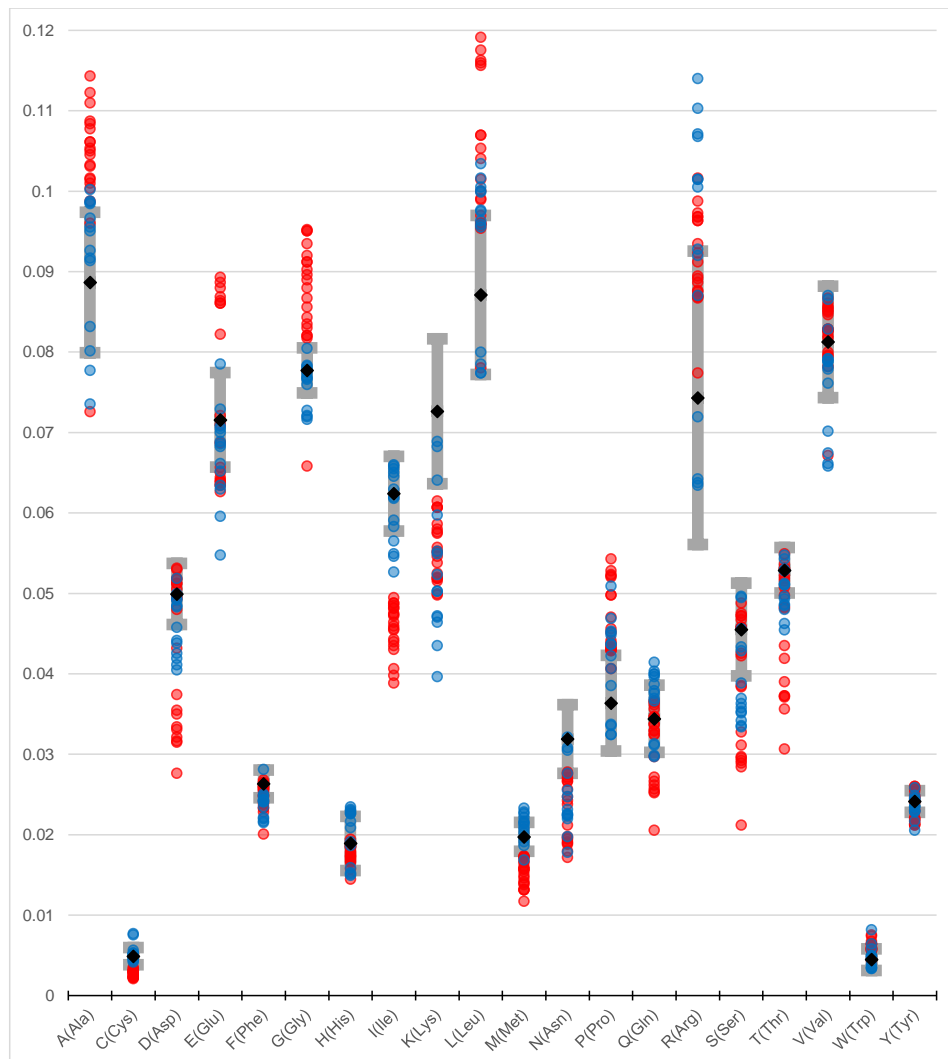

**Figure S3** Average amino acid frequency for FULL (766 species) dataset (black dot) and plus/minus standard deviation (grey bars), as well as amino acid frequencies for species of *Deinococcus-Thermus* (red dots) and *Chloroflexi* (blue dots).

Commented [FUB1]: Add the y-axis

**Table S9** Branch lengths in phylogenies for species of *Deinococcus-Thermus* (DT) and *Chloroflexi* (CHF) based on FULL (766 species) dataset and LOW sampling (i.e., where only species listed is included within corresponding phylum). Branch lengths were calculated from the stem node of the DT group to the tip of each lineage. Dcc.: *Deinococcus*, Th.: *Thermus*.

| DT                    |       |       | CHF                        |       |       |
|-----------------------|-------|-------|----------------------------|-------|-------|
| Species               | FULL  | LOW   | Species                    | FULL  | LOW   |
| Dcc. actinosclerus    | 0.685 | 0.943 | Anaerolinea thermophila    | 0.755 | 0.785 |
| Dcc. deserti          | 0.635 | 0.993 | Caldiilinea aerophila      | 0.66  | 0.683 |
| Dcc. geothermalis     | 0.599 | 0.948 | Chloroflexus aggregans     | 0.703 | 0.695 |
| Dcc. gobiensis        | 0.65  | 0.966 | Chloroflexus aurantiacus   | 0.702 | 0.689 |
| Dcc. maricopensis     | 0.589 | 0.929 | Chloroflexus sp. Y-400-II  | 0.7   | 0.69  |
| Dcc. peraridilitoris  | 0.676 | 0.99  | Dehalococcoides mccartyi   | 0.812 | 0.915 |
| Dcc. proteolyticus    | 0.691 | 0.99  | Dehalococcoides sp. UCH007 | 0.819 | 0.919 |
| Dcc. radiodurans      | 0.687 | 0.395 | Dehalogenimonas            |       |       |
| Dcc. soli             | 0.67  | 0.936 | lykanthroporepellens       | 0.828 | 0.839 |
| Dcc. swuensis         | 0.669 | 0.936 | Dehalogenimonas sp. WBC-2  | 0.849 | 0.925 |
| Marinith.             |       |       | Herpetosiphon aurantiacus  | 0.707 | 0.727 |
| hydrothermalis        | 0.197 | 0.805 | Roseiflexus castenholzii   | 0.689 | 0.692 |
| Meioth. silvanus      | 0.542 | 0.968 | Roseiflexus sp. RS-1       | 0.678 | 0.686 |
| Oceanith. profundus   | 0.558 | 0.83  | Sphaerobacter thermophilus | 0.606 | 0.629 |
| Th. aquaticus         | 0.59  | 0.887 | Thermomicrobium roseum     | 0.709 | 0.685 |
| Th. oshimai           | 0.591 | 0.862 |                            |       |       |
| Th. parvatiensis      | 0.563 | 0.903 |                            |       |       |
| Th. scotoductus       | 0.608 | 0.876 |                            |       |       |
| Th. sp. CCB           | 0.54  | 0.889 |                            |       |       |
| Th. thermophilus      | 0.562 | 0.851 |                            |       |       |
| Truepera radiovictrix | 0.539 | 0.933 |                            |       |       |

### 3. Supplementary Data

FULL (766 species) tree in newick format:

```
(((((Oscillibacter_valericigenes_Sjm18-
20.693746:0.26249,Intestinimonas_butyrificiproducens.1297617:0.20826)1.000:0.26511,((Ruminococcus_albus_7_DSM_20455.6
97329:0.12533,Ruminococcus_bicirculans.1160721:0.11329)1.000:0.34944,(_Clostridium_cellulosi.29343:0.19313,Ethanoligenen
s_harbinense_YUAN-
3.663278:0.25848)1.000:0.13489)0.963:0.05970)1.000:0.21456,(((Clostridium_cellulolyticum_H10.394503:0.03848,Clostridium_s
p._BNL1100.755731:0.02913)1.000:0.22573,(Ruminiclostridium_thermocellum_ATCC_27405.203119:0.14695,_Clostridium_clarifi
avum_DSM_19732.720554:0.13698)1.000:0.07244)1.000:0.07066,(_Clostridium_stercorarium_subsp._stercorarium_DSM_8532.1
121335:0.28592,Mageeibacillus_indolicus_UPII9-
5.699246:0.74338)0.081:0.05884)1.000:0.08305)1.000:0.05003,(((Clostridium_acidurici_9a.1128398:0.34906,((Peptoclostridium_
difficile.1496:0.26947,(_Clostridium_sticklandii.1511:0.24829,Filifactor_alocis_ATCC_35896.546269:0.34851)1.000:0.12057,Euba
cterium_acidaminophilum_DSM_3953.1286171:0.31776)0.059:0.03967)1.000:0.12462,(Alkaliphilus_oremlandii_OhILAs.350688:0.1
7441,(Clostridium_aceticum.84022:0.17129,Alkaliphilus_metaliredigens_QYMF.293826:0.19620)0.589:0.03855)1.000:0.13925)1.0
00:0.05641)1.000:0.05828,(Eubacterium_sulci_ATCC_35585.888727:0.57132,(Eubacterium_limosum_KIST612.903814:0.18073,A
cetobacterium_woodii_DSM_1030.931626:0.21574)1.000:0.34424)0.918:0.06237)0.854:0.03412,(((Candidatus_Arthromitus_sp._S
FB-rat-Yit.1041504:0.07309,(Candidatus_Arthromitus_sp._SFB-mouse-Japan.1029718:0.00268,Candidatus_Arthromitus_sp._SFB-
mouse-
NL.1508644:0.00312)1.000:0.07017)1.000:0.49450,((Clostridium_baratii_str._Sullivan.1415775:0.13564,(Clostridium_butyricum.14
92:0.05391,(Clostridium_saccharobutylicum_DSM_13864.1345695:0.04081,(Clostridium_saccharoperbutylacetonicum_N1-
4_HMT_931276:0.04410,(Clostridium_beijerinckii.1520:0.00164,Clostridium_pasteurianum_NRRLL_B-
598.1428454:0.00275)1.000:0.03612)1.000:0.03561)0.999:0.02261)1.000:0.10523)1.000:0.11868,((Clostridium_novyi_NT.386415:
0.21065,(((Clostridium_scatologenes.1548:0.01357,Clostridium_carboxidivorans_P7.536227:0.01003)1.000:0.10408,(Clostridium_kl
uyveri_DSM_555.431943:0.11182,(Clostridium_ljungdahlii_DSM_13528.748727:0.00123,Clostridium_autoethanogenum_DSM_100
61.1341692:0.00260)1.000:0.08958)1.000:0.08550)1.000:0.05686,((Clostridium_sporogenes.1509:0.01290,Clostridium_botulinum_
CDC_1436.1408283:0.01558)1.000:0.18180,Clostridium_tetani_12124569.1231072:0.20192)0.352:0.02965)1.000:0.03427)0.731:0.
02268,(Clostridium_acetobutylicum_DSM_1731.991791:0.22286,(Clostridium_cellulovorans_743B.573061:0.18779,Clostridium_bor
nimense.1216932:0.21571)1.000:0.07515)0.968:0.03096)0.999:0.04297)1.000:0.08881)1.000:0.18241,(((Lachnoclostridium_phytof
ermentans_ISDg.357809:0.17106,Herbinix_sp._SD1D.1679721:0.18201)1.000:0.07223,(((Clostridium_sp._SY8519.1042156:0.249
24,(Agathobacter_rectalis_ATCC_33656.515619:0.14008,Roseburia_hominis_A2-
183.585394:0.11208)1.000:0.06709)0.970:0.03930,Butyrivibrio_proteoclasticus_B316.515622:0.30805)0.804:0.03124,_Eubacteriu
m_eligens_ATCC_27750.515620:0.26206)0.998:0.03341,_Clostridium_saccharolyticum_WM1.610130:0.21113)1.000:0.04374)1.
000:0.19376,(Clostridium_lentocellum_DSM_5427.642492:0.34341,_Clostridium_propionicum_DSM_1682.991789:0.35935)0.416:
0.06123)1.000:0.16087)0.634:0.03542)1.000:0.04505)1.000:0.04771,(((Natranaerobius_thermophilus_JW_NM-WN-
LF.457570:0.50378,((Halothermothrix_oreni_H_168.373903:0.23382,(Halanaerobium_praevalens_DSM_2228.572479:0.11621,Hal
anaerobium_hydrogeniformans.656519:0.10382)1.000:0.26592)1.000:0.16098,(Acetohalobium_arabaticum_DSM_55.01.574087:0.2
4696,Halobacteroides_halobius_DSM_5150.748449:0.32091)1.000:0.13209)1.000:0.14431)1.000:0.07430,((((Thermicola_potens
_JR.635013:0.29611,(Candidatus_Desulfuridus_audaxvivor_MP104C.477974:0.45014,((Desulfotomaculum_nigrificans_CO-1-
SRB.868595:0.07248,(Desulfotomaculum_ruminis_DSM_2154.696281:0.11150,Desulfotomaculum_reducens_MI-
1.349161:0.11786)0.999:0.03408)1.000:0.20907,((Desulfotomaculum_gibsoniae_DSM_7213.767817:0.29469,Desulfotomaculum_a
cetoxidans_DSM_771.485916:0.29755)0.998:0.05923,(Pelotomaculum_thermopropionicum_SI.370438:0.24641,Desulfotomaculum
_kuznetsovii_DSM_6115.760568:0.22281)0.453:0.03548)0.970:0.03218)0.691:0.03282)1.000:0.05868)0.691:0.04150,(Carboxydoth
ermus_hydrogeniformans_Z-
2901.246194:0.40578,Ammonifex_degensii_KC4.429009:0.45689)1.000:0.09325)0.996:0.03636,(((Moorella_thermoacetica.1525:0.
36684,Thermacetogenium_phaeum_DSM_12270.1089553:0.43265)0.775:0.06116,(Syntrophomonas_wolfei_subsp._wolfei_str._Go
ettingen_G311.335541:0.37513,Syntrophothermus_lipocalidus_DSM_12680.643648:0.28543)1.000:0.26654)0.980:0.03614,(Heliob
acterium_modesticaldum_Ice1.498761:0.36146,((Syntrophobotulus_glycolicus_DSM_8271.645991:0.18933,(Dehalobacter_restrictu
s_DSM_9455.871738:0.00527,(Dehalobacter_sp._CF.1131462:0.00054,Dehalobacter_sp._DCA.1147129:0.00055)0.988:0.00395)1
.000:0.16552)1.000:0.11604,((Desulfosporosinus_acidiphilus_SJ4.646529:0.10657,(Desulfosporosinus_meridiei_DSM_13257.7687
04:0.06142,Desulfosporosinus_orientis_DSM_765.768706:0.06559)1.000:0.05504)1.000:0.10284,(Desulfitobacterium_metallicreduc
ens_DSM_15288.871968:0.12684,(Desulfitobacterium_dichloroeliminans_LMG_P-
21439.871963:0.05978,(Desulfitobacterium_hafniense_Y51.138119:0.02957,Desulfitobacterium_dehalogenans_ATCC_51507.7564
99:0.02659)1.000:0.03450)1.000:0.08608)1.000:0.05834)1.000:0.06887)1.000:0.22397)1.000:0.07469)0.973:0.03303)1.000:0.0461
1,(Symbiobacterium_thermophilum_IAM_14863.292459:0.46159,((((Dehalococcoides_mccartyi_195.243164:0.02008,Dehalococco
ides_sp._UCH007.1522671:0.02659)1.000:0.39249,(Dehalogenimonas_lykanthroporepellens_BL-DC-
9.552811:0.17676,Dehalogenimonas_sp._WBC-
2.943347:0.19773)1.000:0.25097)1.000:0.40007,((Caldilinea_aerophila_DSM_14535_NBRC_104270.926550:0.45489,Anaerolin
ea_thermophila_UNI-
1.926569:0.55046)1.000:0.15095,(Thermomicrobium_roseum_DSM_5159.309801:0.34337,Sphaerobacter_thermophilus_DSM_20
745.479434:0.24044)1.000:0.23963,(Herpetosiphon_aurantiacus_DSM_785.316274:0.38824,((Roseiflexus_sp._RS-
1.357808:0.04549,Roseiflexus_castenholzii_DSM_13941.383372:0.05635)1.000:0.20983,(Chloroflexus_aggregans_DSM_9485.32
6427:0.05889,(Chloroflexus_aurantiacus_J-10-fl.324602:0.00396,Chloroflexus_sp._Y-400-
fl.480224:0.00212)1.000:0.05400)1.000:0.22071)1.000:0.10369)1.000:0.19305)1.000:0.07197)0.759:0.05368)1.000:0.11126,(((Syn
echococcus_sp._JA-3-3Ab.321327:0.05778,Synechococcus_sp._JA-2-3B_a_2-
13_321332:0.06401)1.000:0.28170,(((Synechococcus_elongatus_PCC_7942.1140:0.00132,Synechococcus_sp._UTEX_2973.135
0461:0.00401)1.000:0.18182,(Synechococcus_sp._RCC307.316278:0.14841,(Cyanobium_gracile_PCC_6307.292564:0.13456,((Pr
ochlorococcus_marinus_str._MIT_9303.59922:0.11063,(Prochlorococcus_sp._MIT_0604.1501268:0.34785,Prochlorococcus_sp._M
IT_0801.1501269:0.19547)1.000:0.12982)0.998:0.03617,(((Synechococcus_sp._WH_8103.29410:0.06255,(Synechococcus_sp._C
```

C9902.316279:0.08831,(Synechococcus\_sp.\_WH\_8109.166314:0.01426,(Synechococcus\_sp.\_CC9605.110662:0.01556,Synechococcus\_sp.\_KORDI-52.585425:0.02539)0.347:0.00415)1.000:0.05062)0.133:0.01727)1.000:0.01973,(Synechococcus\_sp.\_KORDI-49.585423:0.06061,Synechococcus\_sp.\_KORDI-100.1280380:0.08510)0.675:0.01613)1.000:0.05264,(Synechococcus\_sp.\_WH\_7803.32051:0.06597,Synechococcus\_sp.\_CC9311.64471:0.10639)1.000:0.03918)0.998:0.02488)1.000:0.07493)1.000:0.06838)1.000:0.33581)1.000:0.09539,((((Dactylococcopsis\_salina\_PCC\_8305.13035:0.07628,Halothece\_sp.\_PCC\_7418.65093:0.07125)1.000:0.21352,((Stanieria\_cyanosphaera\_PCC\_7437.111780:0.17774,((Leptolyngbya\_sp.\_PCC\_7376.111781:0.10676,(Synechococcus\_sp.\_PCC\_7002.32049:0.00420,Synechococcus\_sp.\_PCC\_73109.374982:0.01217)1.000:0.07367)1.000:0.16239,(Cyanobacterium\_stanieri\_PCC\_7202.292563:0.12409,(Cyanobacterium\_aponinum\_PCC\_10605.755178:0.11209,(Geminocystis\_sp.\_NIES-3708.1615909:0.06439,Geminocystis\_sp.\_NIES-3709.1617448:0.06356)1.000:0.05289)1.000:0.05243)1.000:0.17560)0.779:0.03653)0.970:0.02645,((Synechocystis\_sp.\_PCC\_6714.1147:0.02091,Synechocystis\_sp.\_PCC\_6803.1148:0.02352)1.000:0.26558,((Pleurocapsa\_sp.\_PCC\_7327.118163:0.11628,(Cyanothece\_sp.\_PCC\_7424.65393:0.06647,Cyanothece\_sp.\_PCC\_7822.497965:0.07366)1.000:0.08123)0.991:0.02344,((Microcystis\_aeruginosa\_NIES-843.449447:0.00743,Microcystis\_panniformis\_FACHB-1757.1638788:0.01283)1.000:0.21725,((cyanobacterium\_endosymbiont\_of\_Epithemia\_turgida\_isolate\_EtSB\_Lake\_Yunoko.1228987:0.14751,(Cyanothece\_sp.\_PCC\_8801.41431:0.00477,Cyanothece\_sp.\_PCC\_8802.395962:0.00457)1.000:0.07266)1.000:0.03964,(Cyanothece\_sp.\_ATCC\_51142.43989:0.06872,Candidatus\_Atelocyanobacterium\_thalassa\_isolate\_ALOHA.1453429:0.23429)1.000:0.06293)1.000:0.05523)0.551:0.01888)0.801:0.02074)0.999:0.02624)0.997:0.03704)1.000:0.06850,((((Criminalium\_epipsammum\_PCC\_9333.1173022:0.14683,Microcoleus\_sp.\_PCC\_7113.1173027:0.12549)0.998:0.03216,((Chroococcidiopsis\_thermalis\_PCC\_7203.251229:0.12768,Gloeocapsa\_sp.\_PCC\_7428.1173026:0.10267)0.993:0.03084,((((Nostoc\_punctiforme\_PCC\_73102.63737:0.05634,Calothrix\_sp.\_PCC\_7507.99598:0.05849)1.000:0.01900,((Anabaena\_sp.\_90.46234:0.02387,Anabaena\_sp.\_wa102.1647413:0.01880)1.000:0.07554,(Anabaena\_cylindrica\_PCC\_7122.272123:0.03872,\_Nostoc\_azollae\_0708.551115:0.05380)1.000:0.01899)1.000:0.03421)0.998:0.01431,(Nostoc\_sp.\_PCC\_7107.317936:0.06824,(Nostoc\_sp.\_PCC\_7524.28072:0.05315,(Nostoc\_sp.\_NIES-3756.1751286:0.03685,(Nostoc\_sp.\_PCC\_7120.103690:0.00766,Anabaena\_variabilis\_ATCC\_29413.240292:0.00875)1.000:0.02370)1.000:0.02838)1.000:0.02181)0.996:0.01368)1.000:0.03055,(Calothrix\_sp.\_336\_3.1337936:0.11347,(Calothrix\_sp.\_PCC\_6303.1170562:0.12675,Rivularia\_sp.\_PCC\_7116.373994:0.15618)0.996:0.03038)0.993:0.02155)0.586:0.01775,Fischerella\_sp.\_NIES-3754.1752063:0.07789)1.000:0.05443)1.000:0.05791)0.868:0.01997,(Oscillatoria\_acuminata\_PCC\_6304.56110:0.21039,(Oscillatoria\_nigroviridis\_PCC\_7112.179408:0.15571,Trichodesmium\_erythraeum\_IMS101.203124:0.21155)1.000:0.04723)1.000:0.03101)0.597:0.01915)0.980:0.02887,(Geitlerinema\_sp.\_PCC\_7407.1173025:0.16829,(Leptolyngbya\_sp.\_O-77.1080068:0.17088,Leptolyngbya\_sp.\_NIES-3755.1752064:0.02627)0.999:0.03690)0.994:0.02679)0.996:0.02711,(((Synechococcus\_sp.\_PCC\_6312.195253:0.18460,Thermosynechococcus\_elongatus\_BP-1.197221:0.22273)1.000:0.08955,Cyanothece\_sp.\_PCC\_7425.395961:0.17929)0.997:0.03754,Acaryochloris\_marina\_MBIC11017.329726:0.23283)1.000:0.05498)0.763:0.02933,(Pseudanabaena\_sp.\_PCC\_7367.82654:0.21337,Synechococcus\_sp.\_PCC\_7502.1173263:0.22751)1.000:0.16678)0.820:0.03772)1.000:0.08963)1.000:0.08317,(Gloeobacter\_violaceus\_PCC\_7421.251221:0.10952,Gloeobacter\_kilaueensis\_JS1.1183438:0.09935)1.000:0.28699)1.000:0.48633,((((Oceanithermus\_profundus\_DSM\_14977.670487:0.25954,Marinithermus\_hydrothermalis\_DSM\_14884.869210:0.13872)0.988:0.05805,(Meiothermus\_silvanus\_DSM\_9946.526227:0.24272,(Thermus\_parvatiensis.456163:0.01734,Thermus\_thermophilus\_JL-18.798128:0.01557)1.000:0.06611,(Thermus\_oshimai\_JL-2.751945:0.08881,(Thermus\_aquaticus\_Y51MC23.498848:0.07022,(Thermus\_scotoductus\_SA-01.743525:0.06843,Thermus\_sp.\_CCB\_US3\_UF1.1111069:0.06027)0.811:0.02018)0.913:0.01827)0.400:0.02154)1.000:0.18093)1.000:0.05875)1.000:0.23962,(Truepera\_radiovitrix\_DSM\_17093.649638:0.42429,((Deinococcus\_maricopensis\_DSM\_21211.709986:0.12200,Deinococcus\_peradilitoris\_DSM\_19664.937777:0.20930)0.880:0.04350,((Deinococcus\_geothermalis\_DSM\_11300.319795:0.08103,((Deinococcus\_suwensis.1182571:0.10705,(Deinococcus\_deserti\_VCD115.546414:0.08028,(\_Deinococcus\_soli\_Ch\_a\_et\_al.\_2014.1309411:0.01063,Deinococcus\_actinoscleris.1768108:0.01505)1.000:0.07800)0.546:0.01918)0.991:0.01816,(Deinococcus\_gobiensis\_I-0.745776:0.08011,Deinococcus\_radiodurans\_R1.243230:0.11661)0.955:0.02571)1.000:0.02626)0.997:0.03764,Deinococcus\_proteolyticus\_MRP.693977:0.21140)1.000:0.05644)1.000:0.30878)1.000:0.11478)1.000:0.36905,(Coprothermobacter\_proteolyticus\_DSM\_5265.309798:0.98149,Thermodesulfobium\_narugense\_DSM\_14796.747365:0.97656)1.000:0.20808)0.618:0.07705,((Conexibacter\_woesei\_DSM\_14684.469383:0.65865,(Rubrobacter\_radiotolerans.42256:0.22861,Rubrobacter\_xylanophilus\_DSM\_9941.266117:0.15177)1.000:0.47414)1.000:0.17889,((Slackia\_heliotritinireducens\_DSM\_20476.471855:0.22651,(Cryptobacterium\_curtum\_DSM\_15641.469378:0.31203,(Coriobacteriaceae\_bacterium\_68-1-3.1531429:0.23927,(Adlercreutzia\_equolifaciens\_DSM\_19450.1384484:0.20290,(Eggerthella\_lenta\_DSM\_2243.479437:0.07692,Eggerthella\_sp.\_YY7918.502558:0.10210)1.000:0.07474)0.888:0.04143)0.336:0.03335)0.994:0.04725)1.000:0.13782,(Coriobacterium\_glomerans\_PW2.700015:0.31726,(Atopobium\_parvulum\_DSM\_20469.521095:0.21588,(Olsenella\_uli\_DSM\_7084.633147:0.12123,Olsenella\_sp.\_oral\_taxon\_807.712411:0.19434)1.000:0.06937)1.000:0.12659)1.000:0.13805)1.000:0.38680,((Tropheryma\_whipplei\_str.\_Twist.203267:0.77078,((Scardovia\_inopinata\_JCM\_12537.1150468:0.19222,(Bifidobacterium\_actinocoloniforme\_DSM\_22766.1437605:0.12074,(Bifidobacterium\_asteroides\_PRL2011.1147128:0.07788,(Bifidobacterium\_coryneforme.1687:0.00470,Bifidobacterium\_indicum\_LMG\_11587\_DSM\_20214.1341694:0.00538)1.000:0.08366)1.000:0.06877)1.000:0.06226,(Bifidobacterium\_thermophilum\_RBL67.1254439:0.11962,(Gardnerella\_vaginalis\_ATCC\_14019.525284:0.20160,((((Bifidobacterium\_breve.1685:0.03452,Bifidobacterium\_longum\_subsp.\_infantis\_ATCC\_15697\_JCM\_1222\_DSM\_20088.391904:0.02743)1.000:0.06100,Bifidobacterium\_angulatum\_DSM\_20098\_JCM\_7096.518635:0.10893)1.000:0.03053,(Bifidobacterium\_bifidum.1681:0.08972,Bifidobacterium\_scardovii\_JCM\_12489\_DSM\_13734.1150461:0.06864)1.000:0.02566)0.996:0.01713,((Bifidobacterium\_animalis\_subsp.\_lactis\_CNMC\_I-2494.1042403:0.10435,Bifidobacterium\_pseudolongum\_PV8-2.1447715:0.08962)1.000:0.08173,(Bifidobacterium\_dentium\_JCM\_1195\_DSM\_20436.1150423:0.03567,(Bifidobacterium\_adolescentis.1680:0.03783,(Bifidobacterium\_pseudocatenuatum\_DSM\_20438\_JCM\_1200\_LMG\_10505.547043:0.00610,(Bifidobacterium\_catenulatum\_DSM\_16992\_JCM\_1194\_LMG\_11043.566552:0.00556,Bifidobacterium\_kashiwanohense\_JCM\_15439\_DSM\_21854.1150460:0.00689)0.973:0.00347)1.000:0.02679)0.999:0.02228)1.000:0.04960)0.429:0.02052)0.999:0.02735)0.926:0.01977)1.000:0.05351)1.000:0.05570)1.000:0.36067,((((((((Arthrobacter\_arilaitensis.256701:0.04150,(Arthrobacter\_sp.\_YC-



RL1.1652545:0.00266,Arthrobacter\_sp.\_LS16.1690248:0.00124)1.000:0.03396)1.000:0.16500,(((Arthrobacter\_sp.\_Hiyo8.1588023:0.05945,(Arthrobacter\_sp.\_ATCC\_21022.1771959:0.02628,(Arthrobacter\_aurescens\_TC1.290340:0.00192,Arthrobacter\_sp.\_Rue61a.1118963:0.00342)1.000:0.01916)1.000:0.01745)0.966:0.01534,((Arthrobacter\_chlorophenolicus\_A6.452863:0.02646,Arthrobacter\_phenanthenivorans\_Sphe3.930171:0.02506)1.000:0.01359,(Arthrobacter\_sulfonivorans.121292:0.03256,Arthrobacter\_sp.\_FB24.290399:0.02775)0.828:0.00804)1.000:0.02730)1.000:0.04751,((Arthrobacter\_sp.\_ERGS1\_01.1704044:0.03446,(Arthrobacter\_sp.\_PAMC25486.1494608:0.03356,(Arthrobacter\_sp.\_A3.595593:0.02678,Arthrobacter\_alpinus.656366:0.03225)0.972:0.00871)1.000:0.03190)1.000:0.08062,(Renibacterium\_salmoninarum\_ATCC\_33209.288705:0.07351,Arthrobacter\_sp.\_IHBB\_11108.1618207:0.06712)1.000:0.05369)0.970:0.02505)1.000:0.06444)0.999:0.04183,(Micrococcus\_luteus\_NCTC\_2665.465515:0.23796,((Rothia\_mucilaginosa\_DY-18.680646:0.05453,Rothia\_dentocariosa\_ATCC\_17931.762948:0.07833)1.000:0.17855,(Kocuria\_palustris.71999:0.16702,(Kocuria\_rhizophila\_DC2201.378753:0.13302,Kocuria\_flava.446860:0.08348)0.241:0.02545)1.000:0.04640)1.000:0.05626)0.424:0.02246)1.000:0.08730,(Rhodoluna\_lacicola.529884:0.25313,(((Microbacterium\_sp.\_XT11.367477:0.03646,(Microbacterium\_sp.\_CGR1.1696072:0.04480,Microbacterium\_sp.\_PAMC\_28756.1795053:0.03229)0.737:0.01632)1.000:0.05136,(Microbacterium\_testaceum\_StLB037.979556:0.07990,Microbacterium\_sp.\_No\_7.1714373:0.08185)0.978:0.02326)1.000:0.09519,(Rathayibacter\_toxicus.145458:0.16881,(Leifsonia\_xyli\_subsp.\_cynodontis\_DSM\_46306.1389489:0.11264,(Microterricola\_viridarii.412690:0.11876,Clavibacter\_michiganensis\_subsp.\_sepedonicus.31964:0.15519)0.826:0.02408)0.551:0.02031)0.999:0.03070)1.000:0.09138)1.000:0.11809)1.000:0.06291,(((Kribbella\_flavida\_DSM\_17836.479435:0.20042,((Propionibacterium\_propionicum\_F0230a.767029:0.23430,(Propionibacterium\_freudenreichii\_subsp.\_shermanii\_CIRM-BIA1.754252:0.24953,(Propionibacterium\_acidipropionici\_ATCC\_4875.1171373:0.10798,(Propionibacterium\_avidum\_44067.1170318:0.02592,Propionibacterium\_acnes\_C1.1234380:0.03402)1.000:0.10427)1.000:0.13463)0.992:0.04326)1.000:0.06543,Micrococcus\_phosphovorus\_NM-1.1032480:0.17170)1.000:0.10536)0.752:0.02830,(Aeromicrobium\_erythreum.2041:0.23121,(Pimelobacter\_simplex.2045:0.11821,Nocardioideus\_sp.\_JS614.196162:0.08765)1.000:0.10174)1.000:0.05489)1.000:0.07057,((Catenulispora\_acidiphila\_DSM\_44928.479433:0.21988,(Kitasatospora\_setae\_KM-6054.452652:0.12260,(((Streptomyces\_xiamenensis.408015:0.09825,Streptomyces\_sp.\_CNQ-509.444103:0.08125)0.999:0.02557,((Streptomyces\_violaceusniger\_Tu\_4113.653045:0.03584,Streptomyces\_bingchenggensis\_BCW-1.749414:0.02765)1.000:0.02329,((Streptomyces\_lydicus\_A02.1403539:0.01898,(Streptomyces\_sp.\_769.1262452:0.01795,Streptomyces\_albulus\_ZPM.1434306:0.01719)1.000:0.01995)1.000:0.03038,((Streptomyces\_albus.1888:0.04353,(Streptomyces\_avermitilis\_MA-4680\_NBRC\_14893.227882:0.02647,(((Streptomyces\_ambofaciens\_ATCC\_23877.278992:0.03060,(Streptomyces\_sp.\_4F.1751294:0.02668,((Streptomyces\_cyaneogriseus\_subsp.\_noncyanogenus.477245:0.00087,Streptomyces\_leeuwenhoekii.1437453:0.00301)1.000:0.02400,(Streptomyces\_glaucescens.1907:0.02142,(Streptomyces\_collinus\_Tu\_365.1214242:0.02347,(Streptomyces\_reticulatus.1926:0.01009,Streptomyces\_hygroscopicus\_subsp.\_jinggangensis\_5008.1133850:0.01201)0.996:0.00691)1.000:0.00699)0.070:0.00640)0.361:0.00523)0.982:0.00740)0.620:0.00648,Streptomyces\_sp.\_CdTB01.1725411:0.02074)0.422:0.00723,Streptomyces\_scabiei\_87.22.680198:0.02905)0.995:0.00903)0.999:0.01269)1.000:0.01918,(((Streptomyces\_venezuelae.54571:0.01875,Streptomyces\_vietnamensis.362257:0.01877)1.000:0.02631,Streptomyces\_sp.\_Mg1.465541:0.05789)0.848:0.01026,((Streptomyces\_fulvisimilis\_DSM\_40593.1303692:0.01479,(Streptomyces\_sp.\_CFMR\_7.1649184:0.01150,(Streptomyces\_griseus\_subsp.\_griseus\_NBR C\_13350.455632:0.01142,Streptomyces\_globisporus\_C-1027.1172567:0.00840)0.916:0.00469)0.954:0.00493)1.000:0.01122,(Streptomyces\_sp.\_SirexAA-E.862751:0.02021,(Streptomyces\_pratensis\_ATCC\_33331.591167:0.00232,Streptomyces\_sp.\_PAMC26508.1265601:0.00241)1.000:0.01488)0.999:0.00895)1.000:0.02669)0.781:0.00749,Streptomyces\_pristinaeae.38300:0.02824)1.000:0.01458)1.000:0.02260)1.000:0.01775)0.928:0.01092)1.000:0.02757,Streptomyces\_cattleyae\_NRRL\_8057\_DSM\_46488.1003195:0.06678)1.000:0.03640)1.000:0.07144)1.000:0.05655,(((Frankia\_sp.\_Eul1c.298654:0.11822,(Frankia\_symbiont\_of\_Datisca\_glomerata.656024:0.10954,(Frankia\_sp.\_EAN1pec.298653:0.07472,(Frankia\_sp.\_Ccl3.106370:0.03877,Frankia\_alni\_ACN14a.326424:0.04117)1.000:0.04981)0.969:0.02109)0.526:0.02360)1.000:0.17004,((Stackebrandtia\_nassauensis\_DSM\_44728.446470:0.23616,(((Micromonospora\_aurantiaca\_ATCC\_27029.644283:0.00290,Micromonospora\_sp.\_L5.648999:0.00092)1.000:0.02879,(Verrucospora\_maris\_AB-18-032.263358:0.03127,(Salinispora\_tropica\_CNB-440.369723:0.02127,Salinispora\_arenicola\_CNS-205.391037:0.01668)1.000:0.03647)0.815:0.01090)1.000:0.04180,((Actinoplanes\_sp.\_SE50\_110.134676:0.04211,Actinoplanes\_missouriensis\_431.512565:0.03418)1.000:0.02638,(Actinoplanes\_sp.\_N902-109.649831:0.04419,Actinoplanes\_friuliensis\_DSM\_7358.1246995:0.04577)1.000:0.01905)1.000:0.05108)1.000:0.09836)1.000:0.10359,(Modestobacter\_marinus.477641:0.06390,(Geodermatophilus\_obscurus\_DSM\_43160.526225:0.05155,Blastococcus\_saxobidens\_DD2.1146883:0.05767)0.988:0.02508)1.000:0.19524,(Nakamurella\_multiparita\_DSM\_44233.479431:0.25653,(((Pseudonocardia\_dioxanivorans\_CB1190.675635:0.08337,((Pseudonocardia\_sp.\_EC080619-01.1096856:0.00253,(Pseudonocardia\_sp.\_EC080625-04.1096868:0.00164,Pseudonocardia\_sp.\_EC080610-09.1688404:0.00082)0.485:0.00216)1.000:0.03872,(Pseudonocardia\_sp.\_AL041005-10.445576:0.01065,Pseudonocardia\_sp.\_HH130629-09.1641402:0.01289)1.000:0.03612)1.000:0.10532)1.000:0.09217,((Kibdelosporangium\_phytohabitans.860235:0.11819,(Kutzneria\_albida\_DSM\_43870.1449976:0.09331,(Actinosynnema\_mirum\_DSM\_43827.446462:0.04692,Saccharothrix\_espansensis\_DSM\_44229.1179773:0.04520)1.000:0.06245)0.997:0.02568)0.999:0.02285,(Saccharopolyspora\_erythraea\_NRRL\_2338.405948:0.13938,(Saccharomonospora\_viridis\_DSM\_43017.471857:0.10112,(Amycolatopsis\_methanolica\_239.1068978:0.07398,(Amycolatopsis\_mediterranei\_S699.713604:0.04729,(Amycolatopsis\_lurida\_NRRL\_2430.1460371:0.00481,(Amycolatopsis\_japonica.208439:0.00223,Amycolatopsis\_orientalis\_HCCB10007.1156913:0.00559)0.869:0.00366)1.000:0.03302)1.000:0.05513)1.000:0.02769)1.000:0.05768)0.883:0.01956)1.000:0.03938)0.998:0.02809,(Segniliparus\_rotundus\_DSM\_44985.640132:0.35897,(((Corynebacteriales\_bacterium\_X1036.1528099:0.00232,Corynebacteriales\_bacterium\_X1698.1562462:0.00230)1.000:0.27899,((Corynebacterium\_lactis\_RW2-5.1408189:0.04567,Corynebacterium\_sp.\_ATCC\_6931.1487956:0.05083)1.000:0.15559,(((Corynebacterium\_epidermidicantis.1050174:0.12495,(((Corynebacterium\_diphtheriae\_31A.698962:0.07947,(Corynebacterium\_pseudotuberculosis.1719:0.01828,Corynebacterium\_ulcerans\_FRC58.1408268:0.01271)1.000:0.06041)1.000:0.03503,(Corynebacterium\_vitruerminis\_DSM\_20294.1224164:0.08082,(Corynebacterium\_mustelae.571915:0.11701,Corynebacterium\_kutscheri.35755:0.10368)0.688:0.02164)0.842:0.01479)1.000

0:0.04204,((Corynebacterium\_efficiens\_YS-  
314.196164:0.04929,(Corynebacterium\_callunae\_DSM\_20147.1121353:0.03948,(Corynebacterium\_deserti\_GIMN1.010.931089:0.  
02839,(\_Brevibacterium\_\_flavum.92706:0.00391,Corynebacterium\_glutamicum\_R.340322:0.00519)1.000:0.02701)0.999:0.01463)1  
.000:0.02994)1.000:0.07924,((Corynebacterium\_atypicum.191610:0.21903,(((Corynebacterium\_imitans.156978:0.06948,Corynebact  
terium\_ureicelerivorans.401472:0.08700)1.000:0.11831,(Corynebacterium\_maris\_DSM\_45190.1224163:0.13085,(Corynebacterium  
\_doosanense\_CAU\_212\_\_DSM\_45436.558173:0.09817,Corynebacterium\_uterequi.1072256:0.11808)1.000:0.03819)0.850:0.019  
25)0.999:0.02547,((Corynebacterium\_stationis.1705:0.02949,Corynebacterium\_casei\_LMG\_S-  
19264.1285583:0.02970)1.000:0.06815,(Corynebacterium\_camporealis.161896:0.07385,(Corynebacterium\_singulare.161899:0.  
02814.Corynebacterium\_aurimucosum\_ATCC\_700975.548476:0.02363)1.000:0.05087)1.000:0.03734)1.000:0.06042)0.321:0.0158  
0)0.515:0.01829,(Corynebacterium\_halotolerans\_YIM\_70093\_\_DSM\_44683.1121362:0.07398,(Corynebacterium\_testudinoris.136  
857:0.06293,(Corynebacterium\_humireducens\_NBRC\_106098\_\_DSM\_45392.1223515:0.04536,Corynebacterium\_marinum\_DSM  
\_44953.1224162:0.05637)1.000:0.02642)1.000:0.03472)1.000:0.02433)0.999:0.02478)0.923:0.01515)1.000:0.02454)0.930:0.02814  
,Corynebacterium\_argentoratense\_DSM\_44202.1348662:0.14612)1.000:0.04166,(Corynebacterium\_kroppe\_nstedtii\_DSM\_44385.6  
45127:0.20560,((Corynebacterium\_glyciniphilum\_AJ\_3170.1404245:0.07989,(Corynebacterium\_variabile\_DSM\_44702.858619:0.0  
2874,Corynebacterium\_terpenotabidum\_Y-  
11.1200352:0.04500)1.000:0.05943)1.000:0.06389,(Corynebacterium\_resistens\_DSM\_45100.662755:0.07980,(Corynebacterium\_u  
realitycum\_DSM\_7109.504474:0.13905,(Corynebacterium\_jeikeium\_K411.306537:0.07789,Corynebacterium\_falsenii\_DSM\_44353.  
1451189:0.06660)0.995:0.02182)0.633:0.01598)1.000:0.04481)1.000:0.07820)0.827:0.02842)0.212:0.02700)1.000:0.13554)1.000:  
0.09367,(((Nocardia\_nova\_SH22a.1415166:0.06799,(Nocardia\_cyriacigeorgica\_GUH-  
2.1127134:0.04086,(Nocardia\_farcinica.37329:0.04258,Nocardia\_brasiliensis\_ATCC\_700358.1133849:0.04915)0.991:0.01579)1.00  
0:0.02137)1.000:0.06291,(Rhodococcus\_pyridinivorans\_SB3094.1435356:0.08861,(Rhodococcus\_sp.\_B7740.1564114:0.10825,(R  
hodococcus\_erythropolis\_PR4.234621:0.05209,(Rhodococcus\_jostii\_RHA1.101510:0.00471,Rhodococcus\_opacus\_PD630.543736  
0:0.00577)1.000:0.02837)1.000:0.03585)1.000:0.02740)1.000:0.02676)1.000:0.03692,((Mycobacterium\_abscessus\_subsp.\_bolletii  
50594.1303024:0.09537,((Mycobacterium\_sp.\_EPA45.1545728:0.07559,(Mycobacterium\_sinense.875328:0.08184,((Mycobacteriu  
m\_aviium\_104.243243:0.02390,((Mycobacterium\_sp.\_MOTT36Y.1168287:0.00199,Mycobacterium\_yongonense\_05-  
1390.1138871:0.00202)0.960:0.00086,Mycobacterium\_indicus\_pranii\_MTCC\_9506.1232724:0.00122)0.444:0.00065,Mycobacteriu  
m\_intracellulare\_MOTT-  
64.1138383:0.00109)1.000:0.02719)1.000:0.02915,((Mycobacterium\_leprae\_Br4923.561304:0.06116,Mycobacterium\_haemophilu  
m\_DSM\_44634.1202450:0.01142)1.000:0.02845,((Mycobacterium\_bovis\_BCG.33892:0.00172,(Mycobacterium\_africanum.33894:0.  
.00240,(Mycobacterium\_microti.1806:0.00301,Mycobacterium\_tuberculosis.1773:0.00670)0.000:0.00055)0.831:0.00055)1.000:0.05  
500,(Mycobacterium\_kansasii\_ATCC\_12478.557599:0.03539,(Mycobacterium\_marinum\_M.216594:0.00054,(Mycobacterium\_ulcer  
ans\_Agy99.362242:0.00471,Mycobacterium\_liflandii\_128FXT.459424:0.00204)0.957:0.00107)1.000:0.04773)0.993:0.01143)0.813:  
0.00908)0.990:0.01291)1.000:0.04000)1.000:0.02416)0.935:0.01286,((Mycobacterium\_sp.\_JLS.164757:0.00110,(Mycobacterium\_  
sp.\_MCS.164756:0.00135,Mycobacterium\_sp.\_KMS.189918:0.00053)0.915:0.00103)1.000:0.06405,((Mycobacterium\_sp.\_JS623.2  
12767:0.04466,Mycobacterium\_rhodesiae\_NBB3.710685:0.04812)1.000:0.01808,(Mycobacterium\_chubuense\_NBB4.710421:0.045  
32,(Mycobacterium\_gilvum\_PYR-GCK.350054:0.04004,Mycobacterium\_vanbaalenii\_PYR-  
1.350058:0.03161)1.000:0.02168)1.000:0.02332)0.995:0.01259)0.227:0.01044,((Mycobacterium\_goodii.134601:0.03597,(Mycobact  
erium\_fortuitum.1766:0.00260,Mycobacterium\_sp.\_VKM\_Ac-  
1817D.1273687:0.00340)1.000:0.03333)1.000:0.02269,Mycobacterium\_neoaurum\_VKM\_Ac-  
1815D.700508:0.08173)0.986:0.01224)1.000:0.01754)1.000:0.04408)1.000:0.09583,(Tsukamurella\_paurometabola\_DSM\_20162.5  
21096:0.16338,(Gordonia\_sp.\_QH-  
11.1136941:0.09907,(Gordonia\_polysiprenivorans\_VH2.1112204:0.06915,(Gordonia\_sp.\_KTR9.337191:0.05140,Gordonia\_bronc  
hialis\_DSM\_43247.526226:0.04538)0.998:0.01951)1.000:0.03410)1.000:0.07789)1.000:0.03318)0.574:0.01851)0.989:0.02212)0.7  
85:0.01877,Amycolicococcus\_subflavus\_DQS3-  
9A1.443218:0.17822)0.998:0.03102)1.000:0.06790)1.000:0.04532)1.000:0.04604)0.846:0.02429)1.000:0.03983)1.000:0.04051,(Aci  
dotherrus\_cellulolyticus\_11B.351607:0.30120,((Thermobifida\_fusca\_YX.269800:0.11160,(Nocardiosis\_dassonvillei\_subsp.\_dass  
onvillei\_DSM\_43111.446468:0.03897,Nocardiosis\_alba\_ATCC\_BAA-  
2165.1205910:0.05697)1.000:0.09146)1.000:0.08806,(Thermomonospora\_curvata\_DSM\_43183.471852:0.13567,(Thermobispora\_  
bispora\_DSM\_43833.469371:0.09298,Streptosporangium\_roseum\_DSM\_43021.479432:0.12100)1.000:0.05978)0.858:0.02680)1.0  
00:0.06670)0.999:0.03133)0.093:0.01866)0.999:0.03313)1.000:0.05694,(Kineococcus\_radiotolerans\_SRS30216\_\_ATCC\_BAA-  
149.266940:0.23140,(Kytococcus\_sedentarius\_DSM\_20547.478801:0.28545,((Dermacoccus\_nishinomiyaensis.1274:0.16175,Lutei  
pulveratus\_mongoliensis.571913:0.12736)1.000:0.03904,(Intrasporangium\_calvum\_DSM\_43043.710696:0.15225,Arsenicococcus\_s  
p.\_oral\_taxon\_190.1658671:0.15407)0.968:0.02945)0.766:0.03335)1.000:0.06080)0.184:0.02849)0.999:0.02504)0.185:0.02310,(Br  
achybacterium\_faecium\_DSM\_4810.446465:0.15750,Devriesea\_agamarum.472569:0.13368)1.000:0.21790)0.535:0.02378,(((Cellul  
omonas\_flavigena\_DSM\_20109.446466:0.08107,(Cellulomonas\_fimi\_ATCC\_484.590998:0.05324,Cellulomonas\_gilvus\_ATCC\_131  
27.593907:0.07496)0.999:0.02763)1.000:0.05896,((Sanguibacter\_keddiei\_DSM\_10542.446469:0.10557,Jonesia\_denitrificans\_DS  
M\_20603.471856:0.22533)1.000:0.03819,(Xylanimonas\_cellulosilytica\_DSM\_15894.446471:0.09519,Isopterocola\_variabilis\_225.74  
3718:0.06088)1.000:0.05504)1.000:0.03163)1.000:0.05244,Beutenbergia\_cavernae\_DSM\_12333.471853:0.19830)1.000:0.04306)1  
.000:0.05182,((Actinotignum\_schaalii.59505:0.23036,(Arcanobacterium\_haemolyticum\_DSM\_20595.644284:0.17150,Truoperella\_p  
yogenes\_TP8.1435056:0.16815)1.000:0.09672)1.000:0.14042,((Actinomyces\_oris.544580:0.07280,(Actinomyces\_radidentis.1110  
15:0.07923,Actinomyces\_sp.\_oral\_taxon\_414.712122:0.12095)0.213:0.02157)1.000:0.16849,(Actinomyces\_meyeri.52773:0.25869,  
Mobiluncus\_curtisii\_ATCC\_43063.548479:0.39833)1.000:0.06589)0.990:0.03878)1.000:0.05134)1.000:0.08851)0.987:0.07722)1.00  
0:0.20186,(Acidimicrobium\_ferrooxidans\_DSM\_10331.525909:0.72618,(Ilumatobacter\_coccineus\_YM16-  
304.1313172:0.44162,Actinobacteria\_bacterium\_IMCC26256.1650658:0.39441)1.000:0.12516)1.000:0.11632)1.000:0.11405)0.799  
0:0.04735)1.000:0.09824)0.628:0.05246)0.643:0.04839)1.000:0.08274,(Thermaerobacter\_marianensis\_DSM\_12885.644966:0.4158  
5,Sulfobacillus\_acidophilus\_TPY.1051632:0.63039)1.000:0.09726)0.062:0.05191)0.999:0.05466)0.980:0.04181,((Kyripidia\_tusciae  
DSM\_2912.562970:0.30169,Alicyclobacillus\_acidocaldarius\_subsp.\_acidocaldarius\_Tc-4-  
1.1048834:0.39756)1.000:0.11204,((((((((((Anoxybacillus\_gonensis.198467:0.01037,Anoxybacillus\_flavithermus\_WK1.491915:0.01  
073)1.000:0.08063,((Geobacillus\_sp.\_WCH70.471223:0.01564,(Geobacillus\_sp.\_Y4.1MC1.581103:0.00055,Geobacillus\_thermogl  
cosidasius\_C56-YS93.634956:0.00056)1.000:0.01890)1.000:0.02009,((Geobacillus\_thermodenitrificans\_NG80-

2.420246:0.01539,Geobacillus\_sp.\_JF8.1345697:0.01845)0.968:0.00857,((Geobacillus\_sp.\_LC300.1519377:0.00386,Geobacillus\_sp.\_12AMOR1.1629723:0.00282)1.000:0.01747,(Geobacillus\_thermoleovorans\_CCB\_US3\_UF5.1111068:0.00066,(Geobacillus\_kaustophilus\_HTA426.235909:0.00604,(Geobacillus\_sp.\_C56-T3.691437:0.00106,(Geobacillus\_sp.\_GHH01.1233873:0.00139,(Geobacillus\_sp.\_Y412MC61.544556:0.00083,Geobacillus\_sp.\_Y412MC52.550542:0.00076)0.947:0.00060)0.527:0.00055)0.967:0.00121)0.947:0.00159)1.000:0.01910)0.999:0.00985)1.000:0.06267)1.000:0.04949)1.000:0.07600,(((Bacillus\_sp.\_X1\_2014\_.1565991:0.07907,(Bacillus\_infantis\_NRRL\_B-14911.1367477:0.07983,Bacillus\_sp.\_1NLA3E.666686:0.10388)0.998:0.02366)0.894:0.01519,Bacillus\_methanolicus\_MGA3.796606:0.06179)1.000:0.04203,(Bacillus\_coagulans.1398:0.13968,Bacillus\_smithii.1479:0.10656)1.000:0.03909)0.217:0.01461)0.791:0.02628,((Bacillus\_pumilus.1408:0.00775,Bacillus\_sp.\_WP8.756828:0.00535)1.000:0.06774,(Bacillus\_paralicheniformis.1648923:0.05707,(Bacillus\_atrophaeus\_1942.720555:0.02186,((Bacillus\_sp.\_SDL1.1774743:0.00487,(Bacillus\_methylotrophicus\_SQR9.1423138:0.00115,(Bacillus\_sp.\_Pc3.1446792:0.00073,(Bacillus\_amyloliquefaciens\_Y2.1126211:0.00054,Bacillus\_sp.\_BH072.1570330:0.00055)0.890:0.00055)0.480:0.00054)0.995:0.00344)1.000:0.02722,(Bacillus\_sp.\_JS.1127744:0.00336,(Bacillus\_sp.\_YP1.1574141:0.00084,(Bacillus\_sp.\_1409:0.00055,Bacillus\_sp.\_LM\_4-2.1628753:0.00055)0.935:0.00055)0.999:0.00518)1.000:0.01902)0.772:0.00931)1.000:0.03283)1.000:0.02605)1.000:0.11254,((Bacillus\_cytotoxicus\_NVH\_391-98.315749:0.01702,(Bacillus\_weihenstephanensis.86662:0.01340,(Bacillus\_toyonensis\_BCT-7112.1415784:0.00712,((Bacillus\_thuringiensis\_serovar\_tolworthi.1442:0.00055,Bacillus\_bombisepticus\_str.\_Wang.1330043:0.00150)0.978:0.00130,(Bacillus\_cereus\_03BB108.451709:0.00089,Bacillus\_anthraxis\_str.\_CDC\_684.568206:0.00141)1.000:0.00708)0.999:0.00374)0.876:0.00567)1.000:0.03034)1.000:0.14736,(Bacillus\_endophyticus.135735:0.13051,Bacillus\_megaterium\_NBRC\_15308\_\_ATCC\_14581.1348623:0.09616)1.000:0.04520)0.484:0.01845)0.977:0.02105)1.000:0.03337,(Listeria\_welshimeri\_serovar\_6\_b\_str.\_SLCC5334.386043:0.27132,(Jeotgalibacillus\_sp.\_D5.1508404:0.16475,(Bacillus\_sp.\_Ox-B-1.98228:0.16218,(Planococcus\_rifietoensis.200991:0.05130,(Planococcus\_kocurii.1374:0.01469,Planococcus\_sp.\_PAMC\_21323.1526927:0.01057)1.000:0.04914)1.000:0.10619,(Kurthia\_sp.\_11kri321.1750719:0.13744,(Solibacillus\_silvestris\_StLB046.1002809:0.08476,(Lysinibacillus\_varians.1145276:0.02309,(Lysinibacillus\_fusiformis.28031:0.00670,Lysinibacillus\_sphaericus\_C3-41.444177:0.00497)1.000:0.02619)1.000:0.04982)1.000:0.05994)1.000:0.04438)0.631:0.02127)1.000:0.08654)0.999:0.03445)0.984:0.02623)0.972:0.03405,(Exiguobacterium\_sp.\_AT1b.360911:0.12218,(Exiguobacterium\_sp.\_MH3.1399115:0.02179,(Exiguobacterium\_sibiricum\_255-15.262543:0.00888,Exiguobacterium\_antarcticum\_B7.1087448:0.01285)1.000:0.02552)1.000:0.11751)1.000:0.23171,((((Lactobacillus\_salivarius.1624:0.11798,Lactobacillus\_ruminis\_ATCC\_27782.1069534:0.15207)1.000:0.13209,(((Weissella\_koreensis\_KACC\_15510.1045854:0.13324,(Weissella\_cibaria.137591:0.08092,Weissella\_ceti.759620:0.16662)0.459:0.03519)1.000:0.11875,((Leuconostoc\_mesenteroides\_subsp.\_mesenteroides\_ATCC\_8293.203120:0.06789,(Leuconostoc\_citream\_KM20.349519:0.06342,(Leuconostoc\_carnosum\_JB16.1229758:0.07282,(Leuconostoc\_gelidum\_subsp.\_gasicomitatum\_KG16-1.1165892:0.05067,(Leuconostoc\_kimchii\_IMSNU\_11154.762051:0.00339,Leuconostoc\_sp.\_C2.979982:0.00592)1.000:0.04113)1.000:0.02151)0.076:0.01202)1.000:0.03563)1.000:0.16341,(Oenococcus\_oeni\_PSU-1.203123:0.10199,Oenococcus\_kitaharae\_DSM\_17330.1045004:0.10414)1.000:0.34050)1.000:0.09761)1.000:0.13490,((Pediococcus\_pentosaceus\_ATCC\_25745.278197:0.10859,Pediococcus\_clausenii\_ATCC\_BAA-344.701521:0.11227)1.000:0.15782,((Lactobacillus\_hokkaidonensis\_JCM\_18461.1291742:0.14276,(Lactobacillus\_reuteri\_SD2112.491077:0.08935,(Lactobacillus\_mucosae\_LM1.1130798:0.10618,Lactobacillus\_fermentum\_3872.1381124:0.12625)1.000:0.04846)1.000:0.11251)1.000:0.07589,(Lactobacillus\_paraplantarum\_60520:0.01102,Lactobacillus\_plantarum\_ZJ316.1284663:0.00995)1.000:0.17748,(Lactobacillus\_koreensis.637971:0.17105,(Lactobacillus\_buchneri\_NRRL\_B-30929.511437:0.18544,(Lactobacillus\_kunkeei.148814:0.18059,Lactobacillus\_sanfranciscensis\_TMW\_1.1304.714313:0.26997)1.000:0.05535)1.000:0.07055)0.995:0.03662)0.996:0.02622)0.834:0.02266)0.969:0.03027)0.985:0.02844)0.997:0.04211,(((Lactobacillus\_ginsenosidimutans.1007676:0.09477,Lactobacillus\_heilongjiangensis.1074467:0.09490)1.000:0.20467,((Lactobacillus\_johnsonii\_NCC\_533.257314:0.01276,Lactobacillus\_gasserii\_130918.1403312:0.01188)1.000:0.10184,(Lactobacillus\_delbrueckii\_subsp.\_bulgaricus\_ND02.767455:0.20906,((Lactobacillus\_kefiranofaciens\_ZW3.1033837:0.03789,(Lactobacillus\_acidophilus\_30SC.891391:0.02700,(Lactobacillus\_gallinarum\_52242:0.00781,Lactobacillus\_helveticus\_R0052.880633:0.00598)1.000:0.02918)0.480:0.00853)1.000:0.04448,(Lactobacillus\_acetotolerans.1600:0.07443,Lactobacillus\_sp.\_wkB8.1545702:0.10271)1.000:0.05388)1.000:0.05019)0.982:0.05264)1.000:0.30673)1.000:0.09280,(Lactobacillus\_sakei\_subsp.\_sakei\_23K.314315:0.17283,(Lactobacillus\_rhamnosus\_Lc\_705.568704:0.02281,(Lactobacillus\_paracasei.1597:0.00054,Lactobacillus\_casei\_BD-II.998820:0.00441)1.000:0.02732)1.000:0.21168)0.992:0.04992)1.000:0.05061)1.000:0.09074,((Carnobacterium\_maltaromaticum\_LMA28.1234679:0.09092,(Carnobacterium\_sp.\_CP1.1564681:0.08220,(Carnobacterium\_sp.\_17-4.208596:0.02551,Carnobacterium\_inhibens\_subsp.\_gilichinskii.1266845:0.02869)1.000:0.07371)1.000:0.05699)1.000:0.11784,(((Streptococcus\_suis\_T15.1340847:0.07858,(((Streptococcus\_anginosus\_subsp.\_whileyi\_MAS624.1353243:0.01626,(Streptococcus\_intermedius\_B196.862967:0.01938,Streptococcus\_constellatus\_subsp.\_pharyngis\_C1050.862969:0.01524)1.000:0.01065)1.000:0.04219,(Streptococcus\_gordonii.1302:0.03228,(Streptococcus\_sanguinis\_SK36.388919:0.01983,Streptococcus\_oligofermentans\_A\_S\_1.3089.1302863:0.03020)1.000:0.01763)1.000:0.01662)1.000:0.01704,((Streptococcus\_sp.\_oral\_taxon\_431.712633:0.02386,((Streptococcus\_mitis\_B6.365659:0.00942,(Streptococcus\_pneumoniae\_670-6B.189423:0.00926,Streptococcus\_pseudopneumoniae\_IS7493.1054460:0.00716)0.570:0.00184)1.000:0.00589,(Streptococcus\_oralis\_Uo5.927666:0.00605,Streptococcus\_sp.\_VT\_162.1419814:0.00766)1.000:0.00860)1.000:0.01430)1.000:0.03849,(Streptococcus\_parasanguinis\_ATCC\_15912.760570:0.03912,(Streptococcus\_sp.\_I-G2.1156431:0.00528,Streptococcus\_sp.\_I-P16.1156433:0.00484)1.000:0.03498)1.000:0.03910)0.183:0.01071)1.000:0.03914)1.000:0.02851,(Streptococcus\_mutans\_UA159.210007:0.10023,(((Streptococcus\_macedonicus\_ACA-DC\_198.1116231:0.00913,(Streptococcus\_pasteurianus\_ATCC\_43144.981540:0.00692,Streptococcus\_gallolyticus\_subsp.\_gallolyticus\_ATCC\_BAA-2069.990317:0.00221)0.796:0.00349)1.000:0.01802,(Streptococcus\_infantarius\_subsp.\_infantarius\_CJ18.1069533:0.01059,Streptococcus\_lutetiensis\_033.1076934:0.01059)1.000:0.01610)1.000:0.04639,(((Streptococcus\_equi\_subsp.\_zooepidemicus\_ATCC\_35246.1051072:0.06451,(Streptococcus\_pyogenes\_MGAS10270.370552:0.02817,Streptococcus\_dysgalactiae\_subsp.\_equisimilis\_167.1247189:0.01456)1.000:0.02931)1.000:0.02814,(Streptococcus\_uberis\_0140J.218495:0.06948,(Streptococcus\_parauberis\_NCFD\_2020.873447:0.06768,Streptococcus\_iniae\_SF1.1318633:0.05311)0.179:0.01516)1.000:0.01872)1.000:0.04330,(Streptococcus\_a\_galactiae\_ILR1005.1309807:0.08046,Streptococcus\_salivarius\_CCHSS3.1048332:0.08548)0.590:0.01528)0.610:0.01025)0.981:0.01848)1.000:0.02706)1.000:0.10138,(Lactococcus\_piscium\_MKFS47.297352:0.15284,(Lactococcus\_garvieae\_Lg2.420890:0.09110,

Lactococcus\_lactis\_subsp.\_cremoris\_A76.1104322:0.10396)1.000:0.08994)1.000:0.07075)1.000:0.20528,(((Enterococcus\_gallinarum.1353:0.00377,Enterococcus\_casseliflavus\_EC20.565655:0.00307)1.000:0.06846,Tetragenococcus\_halophilus\_NBRC\_12172.945021:0.20548)1.000:0.03126,(Enterococcus\_faecium.1352:0.02799,(Enterococcus\_durans.53345:0.02078,Enterococcus\_hirae\_ATCC\_9790.768486:0.03059)1.000:0.01137)0.961:0.01023,Enterococcus\_mundtii\_QU\_25.1300150:0.03674)1.000:0.06386)1.000:0.02915,(Enterococcus\_faecalis\_V583.226185:0.05481,Enterococcus\_silesiacus.332949:0.07224)1.000:0.04540)1.000:0.07069)0.979:0.04675)0.988:0.04196)0.998:0.03850,((Aerococcus\_urinaehominis.128944:0.20964,(Aerococcus\_viridans.1377:0.00669,Aerococcus\_urinaeequi.51665:0.01186)1.000:0.18801)0.361:0.03669,(Aerococcus\_sanguinicola.119206:0.17093,(Aerococcus\_christense\_nii.87541:0.18344,Aerococcus\_urinae\_ACS-120-V-Col10a.866775:0.12893)1.000:0.12581)1.000:0.04504)1.000:0.18856)1.000:0.13138,((Gemella\_sp.\_oral\_taxon\_928.1785995:0.45536,((Salinicoccus\_halodurans.407035:0.14867,Jeotgaliococcus\_sp.\_13MG44\_air.1461582:0.16906)1.000:0.17989,(Macrococcus\_c\_aseolyticus\_JCSC5402.458233:0.17238,(((Staphylococcus\_hyicus.1284:0.01839,Staphylococcus\_agnethis.985762:0.01865)1.000:0.04407,(Staphylococcus\_schleiferi.1295:0.03780,Staphylococcus\_pseudintermedius\_E140.1266717:0.04146)1.000:0.02776)1.000:0.04577,((Staphylococcus\_simulans.1286:0.04681,Staphylococcus\_carnosus\_subsp.\_carnosus\_TM300.396513:0.04177)1.000:0.05812,((Staphylococcus\_equorum.246432:0.03755,(Staphylococcus\_xylosus.1288:0.02412,Staphylococcus\_saprophyticus\_subsp.\_s\_aphrophyticus\_ATCC\_15305.342451:0.02722)0.996:0.01315)1.000:0.05356,((Staphylococcus\_aureus\_subsp.\_aureus\_TW20.663951:0.01171,Staphylococcus\_argenteus.985002:0.00892)1.000:0.05314,(((Staphylococcus\_warneri\_SG1.1194526:0.00307,Staphylococcus\_pasteuri\_SP1.1276282:0.00607)1.000:0.03627,(Staphylococcus\_capitis\_subsp.\_capitis.72758:0.02593,Staphylococcus\_epidermidis\_RP62A.176279:0.03444)1.000:0.01667)0.990:0.00798,(Staphylococcus\_haemolyticus\_JCSC1435.279808:0.04414,Staphylococcus\_lugdunensis\_HKU09-01.698737:0.05721)0.999:0.01353)0.334:0.01048)1.000:0.01780)1.000:0.02283)1.000:0.03025)1.000:0.10685)1.000:0.06047)1.000:0.08422)1.000:0.07462,(Mollicutes\_bacterium\_HR1.1541959:0.45305,(Acholeplasma\_brassicae.61635:0.32497,(Acholeplasma\_oculi.35623:0.15390,Acholeplasma\_laidlawii\_PG-8A.441768:0.19356)1.000:0.21080,(Acholeplasma\_palmae\_J233.1318466:0.18787,(Candidatus\_Phytoplasma\_mali.37692:0.45842,(Strawberry\_lethal\_yellows\_phytoplasma\_CPA\_str.\_NZSb11.980422:0.19749,(Onion\_yellows\_phytoplasma\_OY-M.262768:0.02011,Aster\_yellows\_witches\_broom\_phytoplasma\_AYWB.322098:0.03968)1.000:0.12777)1.000:0.19403)1.000:0.28602)0.889:0.05210)1.000:0.14659)1.000:0.23755)0.998:0.09611,(((Spiroplasma\_eriocheiridis\_CCTCC\_M\_207170.743698:0.01346,(Spiroplasma\_mirum\_ATCC\_29335.838561:0.00524,Spiroplasma\_atrichopogonis.1114980:0.00106)1.000:0.01939)1.000:0.13451,(Spiroplasma\_kunkelii\_CR2-3x.273035:0.16469,(Spiroplasma\_chrysopicala\_DF-1.1276227:0.02203,Spiroplasma\_syrphidicola\_EA-1.1276229:0.02144)1.000:0.15406)0.999:0.06102)1.000:0.24151,((Mesoplasma\_florum\_W37.1406864:0.24248,(Mycoplasma\_mycoides\_subsp.\_mycoides.2103:0.03785,Mycoplasma\_capricolum\_subsp.\_capripneumoniae.40480:0.03709)1.000:0.13946,(Mycoplasma\_sma\_yeastii\_GM274B.743967:0.07956,Mycoplasma\_putrefaciens\_Mput9231.1292033:0.11509)1.000:0.05954)1.000:0.13354)1.000:0.17215,(Spiroplasma\_sabaudiense\_Ar-1343.1276257:0.26666,(Spiroplasma\_litorale.216942:0.09165,Spiroplasma\_turonicum.216946:0.09401)1.000:0.16077,(Spiroplasma\_taiwanense\_CT-1.1276220:0.11587,(Spiroplasma\_cantharicola.362837:0.05740,Spiroplasma\_diminutum\_CUAS-1.1276221:0.05931)1.000:0.07831)1.000:0.04667,(Spiroplasma\_culicicola\_AES-1.1276246:0.13304,Spiroplasma\_apis\_B31.1276258:0.13781)1.000:0.05083)0.919:0.03929)1.000:0.11022)1.000:0.07647)1.000:0.16781)1.000:0.23258,((Candidatus\_Hepatoplasma\_crinochetorum\_Av.1427984:1.00275,(((Mycoplasma\_californicum.2113:0.29865,(Mycoplasma\_fermentans\_M64.943945:0.21079,(Mycoplasma\_agalactiae.2110:0.04342,Mycoplasma\_bovis\_Hubei-1.956483:0.05109)1.000:0.24990)0.765:0.05916)1.000:0.16124,(Mycoplasma\_crocodyli\_MP145.512564:0.31003,(Mycoplasma\_synoviae\_ATCC\_25204.1267001:0.42685,(Mycoplasma\_gallinaceum.29556:0.25253,(Mycoplasma\_canis.29555:0.11771,Mycoplasma\_cynos\_C142.1246955:0.15960)1.000:0.19329)0.961:0.06098)1.000:0.08894)1.000:0.08435)1.000:0.14663,((Mycoplasma\_arthritis\_dis\_158L3-1.243272:0.24585,(Mycoplasma\_hominis\_ATCC\_27545.1267000:0.21431,(Mycoplasma\_arginini.2094:0.11266,Mycoplasma\_candense.29554:0.11361)1.000:0.18399)0.969:0.07041)1.000:0.38045,(Mycoplasma\_mobile\_163K.267748:0.52078,(Mycoplasma\_hyorhinis\_MCLD.936139:0.37879,(Mycoplasma\_bovoculi\_M165\_69.743966:0.29065,(Mycoplasma\_hyopneumoniae\_7448.262722:0.12019,(Mycoplasma\_dispar.86660:0.09486,Mycoplasma\_flocculare\_ATCC\_27399.743971:0.10827)0.406:0.03599)1.000:0.34415)1.000:0.13978)1.000:0.22497)0.596:0.06997)0.792:0.06051)1.000:0.36718)0.993:0.09487,(((Mycoplasma\_haemofelis\_str.\_Langford\_1.941640:0.02738,Mycoplasma\_haemocanis\_str.\_Illinois.1111676:0.05051)1.000:0.69402,((Mycoplasma\_suis\_str.\_Illinois.768700:0.15234,Mycoplasma\_parvum\_str.\_Indiana.1403316:0.14301)1.000:0.15341,(Candidatus\_Mycoplasma\_haemolamae\_str.\_Purdue.1212765:0.27499,(Mycoplasma\_wenyoni\_str.\_Massachusetts.1197325:0.09370,Mycoplasma\_ovis\_str.\_Michigan.1415773:0.12633)1.000:0.26523)0.940:0.10413)1.000:0.99712)1.000:0.69134,((Mycoplasma\_penetrans\_HF-2.272633:0.58473,Candidatus\_Mycoplasma\_girerdii.1318617:0.71874)0.949:0.09462,((Ureaplasma\_parvum\_serovar\_3\_str.\_ATCC\_700970.273119:0.04330,Ureaplasma\_urealyticum\_serovar\_10\_str.\_ATCC\_33699.565575:0.02904)1.000:0.62618,(Mycoplasma\_gallisepticum\_S6.1006581:0.44895,(Mycoplasma\_genitalium\_M6320.662945:0.23008,Mycoplasma\_pneumoniae\_M29.1441379:0.18802)1.000:0.60314)1.000:0.27764)0.848:0.06678)0.902:0.08267)1.000:0.27219,Mycoplasma\_sp.\_ex\_Biomphalaria\_glabrata\_1749074:0.99852)0.237:0.09818)1.000:0.11125)1.000:0.25509)1.000:0.19743)0.283:0.04594)0.994:0.03726)0.735:0.03519)0.999:0.02667,(Amphibacillus\_xylanus\_NBRC\_15112.698758:0.21906,((Lentibacillus\_amyloliquefaciens.1472767:0.17066,(Oceanobacillus\_heyensis\_HTE831.221109:0.13569,Virgibacillus\_sp.\_SK37.403957:0.09854)0.831:0.03016)1.000:0.05547,(Terribacillus\_aidingensis.586416:0.15915,Halobacillus\_halophilus\_DSM\_2266.866895:0.18954)0.187:0.02951)1.000:0.03751)1.000:0.11184)1.000:0.03108,((Bacillus\_selenitireducens\_MLS10.439292:0.18006,Bacillus\_cellulosilyticus\_DSM\_2522.649639:0.12693)1.000:0.09832,(Bacillus\_halodurans\_C-125.272558:0.12355,((Bacillus\_clausii.79880:0.08088,Bacillus\_lehensis\_G1.1246626:0.10747)1.000:0.12610,Bacillus\_pseudofirmus\_OF4.398511:0.11437)0.872:0.03403)1.000:0.05840)1.000:0.03288)1.000:0.12409,(Aneurinibacillus\_sp.\_XH2.1450761:0.20716,(Brevibacillus\_brevis\_NBRC\_100599.358681:0.10466,Brevibacillus\_laterosporus\_LMG\_15441.1042163:0.10889)1.000:0.15528)0.998:0.05119)0.988:0.04734,((Paenibacillus\_larvae\_subsp.\_larvae\_DSM\_25430.697284:0.14848,(Paenibacillus\_naphthalenovorans.162209:0.06194,Poenibacillus\_mucilaginossus\_KNP414.1036673:0.06918)1.000:0.07857)0.986:0.03729,((Paenibacillus\_bovis.1616788:0.11658,((Paenibacillus\_polymyxa\_SC2.886882:0.00611,(Paenibacillus\_peoriae.59893:0.00483,(Paenibacillus\_sp.\_IHB\_B\_3084.867076:0.00370,Poenibacillus\_terrae\_HPL-003.985665:0.00392)1.000:0.01069)0.200:0.00516)1.000:0.08083,(Paenibacillus\_sp.\_Y412MC10.481743:0.07997,(((Paenibacillus

\_odorifer.189426:0.00698,(Paenibacillus\_sp.\_FSL\_R5-0345.1536770:0.00165,Paenibacillus\_sp.\_FSL\_H7-0737.1536775:0.00266)0.999:0.00461)1.000:0.01946,((Paenibacillus\_graminis.189425:0.00346,Paenibacillus\_riograndensis\_SBR5.1073571:0.00683)1.000:0.01372,((Paenibacillus\_sp.\_FSL\_R7-0273.1536772:0.00605,Paenibacillus\_sp.\_FSL\_R7-0331.1536773:0.00810)1.000:0.02248,(Paenibacillus\_sp.\_FSL\_H7-0357.1536774:0.01924,(Paenibacillus\_borealis.160799:0.00252,(Paenibacillus\_sp.\_FSL\_P4-0081.1536769:0.00133,Paenibacillus\_sp.\_FSL\_R5-0912.1536771:0.00202)0.988:0.00221)1.000:0.01538)0.960:0.00611)0.136:0.00325)1.000:0.01092)1.000:0.02519,(Paenibacillus\_stellifer.169760:0.03707,(Paenibacillus\_durus.44251:0.01671,Paenibacillus\_sabinae\_T27.1268072:0.02047)0.988:0.01145)1.000:0.03428)1.000:0.05236,Paenibacillus\_sp.\_IHB.10380.1566358:0.09564)0.437:0.01572)0.991:0.01959)0.986:0.02683)1.000:0.06993,(Thermobacillus\_composti\_KWC4.717605:0.15261,(Paenibacillus\_sp.\_320-W.1695218:0.09556,(Paenibacillus\_sp.\_JDR-2.324057:0.10228,Paenibacillus\_beijingensis.1126833:0.10094)0.992:0.02699)0.721:0.02118)1.000:0.04574)1.000:0.03546)1.000:0.14689)1.000:0.10287)1.000:0.12074)0.089:0.03143)1.000:0.05228,(Thermosediminibacter\_oceani\_DSM\_16646.555079:0.19951,Tepidanaerobacter\_acetatoxydans\_Re1.1209989:0.25862)1.000:0.23676)0.999:0.05148)0.927:0.03092,Mahella\_australiensis\_50-1\_BON.697281:0.48583,((Caldicellulosiruptor\_saccharolyticus\_DSM\_8903.351627:0.06859,((Caldicellulosiruptor\_obsidiansis\_OB4.7.608506:0.01156,Caldicellulosiruptor\_owensensis\_OL.632518:0.01628)1.000:0.00917,(Caldicellulosiruptor\_hydrothermalis\_108.63.2292:0.00900,((Caldicellulosiruptor\_bescii\_DSM\_6725.521460:0.00907,Caldicellulosiruptor\_kronotskyensis\_2002.632348:0.00976)1.000:0.00999,(Caldicellulosiruptor\_kristjanssonii\_I77R1B.632335:0.00266,Caldicellulosiruptor\_lactooaceticus\_6A.632516:0.00281)1.000:0.00773)0.230:0.00310)1.000:0.01248)1.000:0.06983)1.000:0.43369,((Thermoanaerobacterium\_thermosaccharolyticum\_M07.95.698948:0.05411,(Thermoanaerobacterium\_xylanolyticum\_LX-11.858215:0.01231,Thermoanaerobacterium\_saccharolyticum\_JW\_SL-YS485.1094508:0.01802)1.000:0.03954)1.000:0.18605,(Caldanaerobacter\_subterraneus\_subsp.\_tengcongensis\_MB4.273068:0.10934,(Thermoanaerobacter\_kivui.2325:0.07419,((Thermoanaerobacter\_italicus\_Ab9.580331:0.00486,Thermoanaerobacter\_mathranii\_i\_subsp.\_mathranii\_str.\_A3.583358:0.00539)1.000:0.03073,(Thermoanaerobacter\_wiegeli\_Rt8.B1.697303:0.01006,((Thermoanaerobacter\_sp.\_X514.399726:0.00055,Thermoanaerobacter\_sp.\_X513.573062:0.00074)0.992:0.00270,(Thermoanaerobacter\_pseudetanolicus\_ATCC\_33223.340099:0.00055,Thermoanaerobacter\_brockii\_subsp.\_finnii\_Ako-1.509193:0.00071)1.000:0.00466)1.000:0.00659)0.997:0.01005)0.939:0.02013)0.989:0.04667)1.000:0.11969)1.000:0.18714)0.884:0.03569);

**Table S10** Full species list for 766 species used in the analysis with taxon id and internal species id.

| Species                      | Taxon id | Species                            | Taxon id |
|------------------------------|----------|------------------------------------|----------|
| Synechococcus elongatus      | 1140     | Clostridium butyricum              | 1492     |
| Synechocystis sp.            | 1147     | Peptoclostridium difficile         | 1496     |
| Synechocystis sp.            | 1148     | Clostridium sp. orogenes           | 1509     |
| Dermacoccus nishinomiyaensis | 1274     | Clostridium sticklandii            | 1511     |
| Staphylococcus hyicus        | 1284     | Clostridium beijerinckii           | 1520     |
| Staphylococcus simulans      | 1286     | Moorella thermoacetica             | 1525     |
| Staphylococcus xylosus       | 1288     | Clostridium scatologenes           | 1548     |
| Staphylococcus schleiferi    | 1295     | Lactobacillus paracasei            | 1597     |
| Streptococcus gordonii       | 1302     | Lactobacillus acetotolerans        | 1600     |
| Enterococcus faecium         | 1352     | Lactobacillus salivarius           | 1624     |
| Enterococcus gallinarum      | 1353     | Bifidobacterium adolescentis       | 1680     |
| Planococcus kocurii          | 1374     | Bifidobacterium bifidum            | 1681     |
| Aerococcus viridans          | 1377     | Bifidobacterium breve              | 1685     |
| Bacillus coagulans           | 1398     | Bifidobacterium coryneforme        | 1687     |
| Bacillus pumilus             | 1408     | Corynebacterium stationis          | 1705     |
| Bacillus sp.                 | 1409     | Corynebacterium pseudotuberculosis | 1719     |
| Bacillus thuringiensis       | 1442     | Mycobacterium fortuitum            | 1766     |
| Bacillus smithii             | 1479     |                                    |          |

|                                |       |                             |        |
|--------------------------------|-------|-----------------------------|--------|
| Mycobacterium tuberculosis     | 1773  | Aerococcus urinaeequi       | 51665  |
| Mycobacterium microti          | 1806  | Lactobacillus gallinarum    | 52242  |
| Streptomyces albus             | 1888  | Actinomyces meyeri          | 52773  |
| Streptomyces glaucescens       | 1907  | Enterococcus durans         | 53345  |
| Streptomyces reticuli          | 1926  | Streptomyces venezuelae     | 54571  |
| Aeromicrobium erythreum        | 2041  | Oscillatoria acuminata      | 56110  |
| Pimelobacter simplex           | 2045  | Actinotignum schaalii       | 59505  |
| Mycoplasma arginini            | 2094  | Paenibacillus peoriae       | 59893  |
| Mycoplasma mycoides            | 2103  | Prochlorococcus marinus     | 59922  |
| Mycoplasma agalactiae          | 2110  | Lactobacillus paraplantarum | 60520  |
| Mycoplasma californicum        | 2113  | Acholeplasma brassicae      | 61635  |
| Thermoanaerobacter kivui       | 2325  | Nostoc punctiforme          | 63737  |
| Dactylococcopsis salina        | 13035 | Synechococcus sp.           | 64471  |
| Lysinibacillus fusiformis      | 28031 | Halotheca sp.               | 65093  |
| Nostoc sp.                     | 28072 | Cyanothece sp.              | 65393  |
| Clostridium cellulosi          | 29343 | Kocuria palustris           | 71999  |
| Synechococcus sp.              | 29410 | Staphylococcus capitis      | 72758  |
| Mycoplasma canadense           | 29554 | Bacillus clausii            | 79880  |
| Mycoplasma canis               | 29555 | Pseudanabaena sp.           | 82654  |
| Mycoplasma gallinaceum         | 29556 | Clostridium acetium         | 84022  |
| Clavibacter michiganensis      | 31964 | Mycoplasma disp.ar          | 86660  |
| Synechococcus sp.              | 32049 | Bacillus weihenstephanensis | 86662  |
| Synechococcus sp.              | 32051 | Aerococcus christensenii    | 87541  |
| Mycobacterium bovis            | 33892 | Brevibacterium flavum       | 92706  |
| Mycobacterium africanum        | 33894 | Bacillus sp.                | 98228  |
| Acholeplasma oculi             | 35623 | Calothrix sp.               | 99598  |
| Corynebacterium kutscheri      | 35755 | Rhodococcus jostii          | 101510 |
| Nocardia farcinica             | 37329 | Nostoc sp.                  | 103690 |
| Candidatus Phytoplasma         | 37692 | Frankia sp.                 | 106370 |
| Streptomyces pristinaespiralis | 38300 | Synechococcus sp.           | 110662 |
| Mycoplasma capricolum          | 40480 | Actinomyces radidentis      | 111015 |
| Cyanothece sp.                 | 41431 | Stanieria cyanosphaera      | 111780 |
| Rubrobacter radiotolerans      | 42256 | Leptolyngbya sp.            | 111781 |
| Cyanothece sp.                 | 43989 | Pleurocapsa sp.             | 118163 |
| Paenibacillus durus            | 44251 | Aerococcus sanguinicola     | 119206 |
| Anabaena sp.                   | 46234 | Arthrobacter sulfonivorans  | 121292 |

|                                        |        |                                           |        |
|----------------------------------------|--------|-------------------------------------------|--------|
| <i>Aerococcus urinaehominis</i>        | 128944 | <i>Amycolatopsis japonica</i>             | 208439 |
| <i>Mycobacterium goodii</i>            | 134601 | <i>Carnobacterium</i> sp.                 | 208596 |
| <i>Actinoplanes</i> sp.                | 134676 | <i>Streptococcus mutans</i>               | 210007 |
| <i>Bacillus endophyticus</i>           | 135735 | <i>Mycobacterium</i> sp.                  | 212767 |
| <i>Corynebacterium testudinis</i>      | 136857 | <i>Mycobacterium marinum</i>              | 216594 |
| <i>Weissella cibaria</i>               | 137591 | <i>Spiroplasma litorale</i>               | 216942 |
| <i>Desulfitobacterium hafniense</i>    | 138119 | <i>Spiroplasma tunicum</i>                | 216946 |
| <i>Rathayibacter toxicus</i>           | 145458 | <i>Streptococcus uberis</i>               | 218495 |
| <i>Lactobacillus kunkei</i>            | 148814 | <i>Oceanobacillus iheyensis</i>           | 221109 |
| <i>Corynebacterium imitans</i>         | 156978 | <i>Enterococcus faecalis</i>              | 226185 |
| <i>Paenibacillus borealis</i>          | 160799 | <i>Streptomyces avermitilis</i>           | 227882 |
| <i>Corynebacterium camporealensis</i>  | 161896 | <i>Rhodococcus erythropolis</i>           | 234621 |
| <i>Corynebacterium singulare</i>       | 161899 | <i>Geobacillus kaustophilus</i>           | 235909 |
| <i>Paenibacillus naphthalenovorans</i> | 162209 | <i>Anabaena variabilis</i>                | 240292 |
| <i>Mycobacterium</i> sp.               | 164756 | <i>Dehalococcoides mccartyi</i>           | 243164 |
| <i>Mycobacterium</i> sp.               | 164757 | <i>Deinococcus radiodurans</i>            | 243230 |
| <i>Synechococcus</i> sp.               | 166314 | <i>Mycobacterium avium</i>                | 243243 |
| <i>Paenibacillus stellifer</i>         | 169760 | <i>Mycoplasma arthritidis</i>             | 243272 |
| <i>Staphylococcus epidermidis</i>      | 176279 | <i>Carboxydotherrmus hydrogenoformans</i> | 246194 |
| <i>Oscillatoria nigro-viridis</i>      | 179408 | <i>Staphylococcus equorum</i>             | 246432 |
| <i>Streptococcus pneumoniae</i>        | 189423 | <i>Gloeobacter violaceus</i>              | 251221 |
| <i>Paenibacillus graminis</i>          | 189425 | <i>Chroococcidiopsis thermalis</i>        | 251229 |
| <i>Paenibacillus odorifer</i>          | 189426 | <i>Arthrobacter arilaitensis</i>          | 256701 |
| <i>Mycobacterium</i> sp.               | 189918 | <i>Lactobacillus johnsonii</i>            | 257314 |
| <i>Corynebacterium atypicum</i>        | 191610 | <i>Exiguobacterium sibiricum</i>          | 262543 |
| <i>Synechococcus</i> sp.               | 195253 | <i>Mycoplasma hyopneumoniae</i>           | 262722 |
| <i>Nocardioides</i> sp.                | 196162 | <i>Onion yellows</i>                      | 262768 |
| <i>Corynebacterium efficiens</i>       | 196164 | <i>Verrucospora maris</i>                 | 263358 |
| <i>Thermosynechococcus elongatus</i>   | 197221 | <i>Rubrobacter xylanophilus</i>           | 266117 |
| <i>Anoxybacillus gonensis</i>          | 198467 | <i>Kineococcus radiotolerans</i>          | 266940 |
| <i>Planococcus rifietoensis</i>        | 200991 | <i>Mycoplasma mobile</i>                  | 267748 |
| <i>Ruminiclostridium thermocellum</i>  | 203119 | <i>Thermobifida fusca</i>                 | 269800 |
| <i>Leuconostoc mesenteroides</i>       | 203120 | <i>Anabaena cylindrica</i>                | 272123 |
| <i>Oenococcus oeni</i>                 | 203123 | <i>Bacillus halodurans</i>                | 272558 |
| <i>Trichodesmium erythraeum</i>        | 203124 | <i>Mycoplasma penetrans</i>               | 272633 |
| <i>Tropheryma whipplei</i>             | 203267 |                                           |        |

|                                 |        |                                      |        |
|---------------------------------|--------|--------------------------------------|--------|
| Spiroplasma kunkelii            | 273035 | Gordonia sp.                         | 337191 |
| Caldanaerobacter subterraneus   | 273068 | Thermoanaerobacter pseudethanolicus  | 340099 |
| Ureaplasma parvum               | 273119 | Corynebacterium glutamicum           | 340322 |
| Pediococcus pentosaceus         | 278197 | Staphylococcus saprophyticus         | 342451 |
| Streptomyces ambofaciens        | 278992 | Desulfotomaculum reducens            | 349161 |
| Staphylococcus haemolyticus     | 279808 | Leuconostoc citreum                  | 349519 |
| Renibacterium salmoninarum      | 288705 | Mycobacterium gilvum                 | 350054 |
| Arthrobacter aurescens          | 290340 | Mycobacterium vanbaalenii            | 350058 |
| Arthrobacter sp.                | 290399 | Alkaliphilus oremlandii              | 350688 |
| Symbiobacterium thermophilum    | 292459 | Acidothermus cellulolyticus          | 351607 |
| Cyanobacterium stanieri         | 292563 | Caldicellulosiruptor saccharolyticus | 351627 |
| Cyanobium gracile               | 292564 | Roseiflexus sp.                      | 357808 |
| Alkaliphilus metalliredigens    | 293826 | Lachnoclostridium phytofermentans    | 357809 |
| Lactococcus piscium             | 297352 | Brevibacillus brevis                 | 358681 |
| Frankia sp.                     | 298653 | Exiguobacterium sp.                  | 360911 |
| Frankia sp.                     | 298654 | Mycobacterium ulcerans               | 362242 |
| Corynebacterium jeikeium        | 306537 | Streptomyces vietnamensis            | 362257 |
| Coprothermobacter proteolyticus | 309798 | Spiroplasma cantharicola             | 362837 |
| Thermomicrobium roseum          | 309801 | Streptococcus mitis                  | 365659 |
| Lactobacillus sakei             | 314315 | Microbacterium sp.                   | 367477 |
| Bacillus cytotoxicus            | 315749 | Salinispora tropica                  | 369723 |
| Herpetosiphon aurantiacus       | 316274 | Pelotomaculum thermopropionicum      | 370438 |
| Synechococcus sp.               | 316278 | Streptococcus pyogenes               | 370552 |
| Synechococcus sp.               | 316279 | Halothermothrix orenii               | 373903 |
| Nostoc sp.                      | 317936 | Rivularia sp.                        | 373994 |
| Deinococcus geothermalis        | 319795 | Synechococcus sp.                    | 374982 |
| Synechococcus sp.               | 321327 | Kocuria rhizophila                   | 378753 |
| Synechococcus sp.               | 321332 | Roseiflexus castenholzii             | 383372 |
| Aster yellows                   | 322098 | Listeria welshimeri                  | 386043 |
| Paenibacillus sp.               | 324057 | Clostridium novyi                    | 386415 |
| Chloroflexus aurantiacus        | 324602 | Streptococcus sanguinis              | 388919 |
| Frankia alni                    | 326424 | Salinispora arenicola                | 391037 |
| Chloroflexus aggregans          | 326427 | Bifidobacterium longum               | 391904 |
| Acaryochloris marina            | 329726 | Clostridium cellulolyticum           | 394503 |
| Enterococcus silesiacus         | 332949 |                                      |        |
| Syntrophomonas wolfei           | 335541 |                                      |        |



|                                  |        |                              |        |
|----------------------------------|--------|------------------------------|--------|
| Cyanothece sp.                   | 395961 | Macrococcus caseolyticus     | 458233 |
| Cyanothece sp.                   | 395962 | Mycobacterium liflandii      | 459424 |
| Staphylococcus carnosus          | 396513 | Micrococcus luteus           | 465515 |
| Bacillus pseudofirmus            | 398511 | Streptomyces sp.             | 465541 |
| Thermoanaerobacter sp.           | 399726 | Thermobisp.ora bisp.ora      | 469371 |
| Corynebacterium ureicelerivorans | 401472 | Cryptobacterium curtum       | 469378 |
| Virgibacillus sp.                | 403957 | Conexibacter woesei          | 469383 |
| Saccharopolysp.ora erythraea     | 405948 | Geobacillus sp.              | 471223 |
| Salinicoccus halodurans          | 407035 | Thermomonosp.ora curvata     | 471852 |
| Streptomyces xiamenensis         | 408015 | Beutenbergia cavernae        | 471853 |
| Microterricola viridarii         | 412690 | Slackia heliotrinireducens   | 471855 |
| Geobacillus thermodenitrificans  | 420246 | Jonesia denitrificans        | 471856 |
| Lactococcus garvieae             | 420890 | Saccharomonosp.ora viridis   | 471857 |
| Ammonifex degensii               | 429009 | Devriesea agamarum           | 472569 |
| Clostridium kluyveri             | 431943 | Streptomyces cyaneogriseus   | 477245 |
| Bacillus selenitireducens        | 439292 | Modestobacter marinus        | 477641 |
| Acholeplasma laidlawii           | 441768 | Candidatus Desulforudis      | 477974 |
| Amycolicoccus subflavus          | 443218 | Kytococcus sedentarius       | 478801 |
| Streptomyces sp.                 | 444103 | Nakamurella multipartita     | 479431 |
| Lysinibacillus sp.haericus       | 444177 | Streptosp.orangium roseum    | 479432 |
| Pseudonocardia sp.               | 445576 | Catenulisp.ora acidiphila    | 479433 |
| Actinosynnema mirum              | 446462 | Sphaerobacter thermophilus   | 479434 |
| Brachybacterium faecium          | 446465 | Kribbella flava              | 479435 |
| Cellulomonas flavigena           | 446466 | Eggerthella lenta            | 479437 |
| Nocardiosis dassonvillei         | 446468 | Chloroflexus sp.             | 480224 |
| Sanguibacter keddiei             | 446469 | Paenibacillus sp.            | 481743 |
| Stackebrandtia nassauensis       | 446470 | Desulfotomaculum acetoxidans | 485916 |
| Xylanimonas cellulosilytica      | 446471 | Lactobacillus reuteri        | 491077 |
| Kocuria flava                    | 446860 | Anoxybacillus flavithermus   | 491915 |
| Microcystis aeruginosa           | 449447 | Cyanothece sp.               | 497965 |
| Bacillus cereus                  | 451709 | Heliobacterium modesticaldum | 498761 |
| Kitasatosp.ora setae             | 452652 | Thermus aquaticus            | 498848 |
| Arthrobacter chlorophenolicus    | 452863 | Eggerthella sp.              | 502558 |
| Streptomyces griseus             | 455632 | Corynebacterium urealyticum  | 504474 |
| Thermus parvatiensis             | 456163 | Thermoanaerobacter brockii   | 509193 |
| Natranaerobius thermophilus      | 457570 | Lactobacillus buchneri       | 511437 |

|                                             |        |                                            |        |
|---------------------------------------------|--------|--------------------------------------------|--------|
| <i>Mycoplasma crocodyli</i>                 | 512564 | <i>Bacillus anthracis</i>                  | 568206 |
| <i>Actinoplanes missouriensis</i>           | 512565 | <i>Lactobacillus rhamnosus</i>             | 568704 |
| <i>Agathobacter rectalis</i>                | 515619 | <i>Luteipulveratus mongoliensis</i>        | 571913 |
| <i>Eubacterium</i>                          | 515620 | <i>Corynebacterium mustelae</i>            | 571915 |
| <i>Butyrivibrio proteoclasticus</i>         | 515622 | <i>Halanaerobium praevalens</i>            | 572479 |
| <i>Bifidobacterium angulatum</i>            | 518635 | <i>Clostridium cellulovorans</i>           | 573061 |
| <i>Atopobium parvulum</i>                   | 521095 | <i>Thermoanaerobacter sp.</i>              | 573062 |
| <i>Tsukamurella paurometabola</i>           | 521096 | <i>Acetohalobium arabaticum</i>            | 574087 |
| <i>Caldicellulosiruptor bescii</i>          | 521460 | <i>Thermoanaerobacter italicus</i>         | 580331 |
| <i>Gardnerella vaginalis</i>                | 525284 | <i>Geobacillus sp.</i>                     | 581103 |
| <i>Acidimicrobium ferrooxidans</i>          | 525909 | <i>Thermoanaerobacter mathranii</i>        | 583358 |
| <i>Geodermatophilus obscurus</i>            | 526225 | <i>Roseburia hominis</i>                   | 585394 |
| <i>Gordonia bronchialis</i>                 | 526226 | <i>Synechococcus sp.</i>                   | 585423 |
| <i>Meiothermus silvanus</i>                 | 526227 | <i>Synechococcus sp.</i>                   | 585425 |
| <i>Rhodoluna laticola</i>                   | 529884 | <i>Terribacillus aidingensis</i>           | 586416 |
| <i>Clostridium carboxidivorans</i>          | 536227 | <i>Cellulomonas fimi</i>                   | 590998 |
| <i>Rhodococcus opacus</i>                   | 543736 | <i>Streptomyces pratensis</i>              | 591167 |
| <i>Geobacillus sp.</i>                      | 544556 | <i>Cellulomonas gilvus</i>                 | 593907 |
| <i>Actinomyces oris</i>                     | 544580 | <i>Arthrobacter sp.</i>                    | 595593 |
| <i>Filifactor alocis</i>                    | 546269 | <i>Caldicellulosiruptor obsidiansis</i>    | 608506 |
| <i>Deinococcus deserti</i>                  | 546414 | <i>Clostridium saccharolyticum</i>         | 610130 |
| <i>Bifidobacterium pseudocatenulatum</i>    | 547043 | <i>Caldicellulosiruptor hydrothermalis</i> | 632292 |
| <i>Corynebacterium aurimucosum</i>          | 548476 | <i>Caldicellulosiruptor kristjanssonii</i> | 632335 |
| <i>Mobiluncus curtisii</i>                  | 548479 | <i>Caldicellulosiruptor kronotskyensis</i> | 632348 |
| <i>Geobacillus sp.</i>                      | 550542 | <i>Caldicellulosiruptor lactoaceticus</i>  | 632516 |
| <i>Nostoc azollae</i>                       | 551115 | <i>Caldicellulosiruptor owensensis</i>     | 632518 |
| <i>Dehalogenimonas lykanthroporepellens</i> | 552811 | <i>Olsenella uli</i>                       | 633147 |
| <i>Thermosediminibacter oceani</i>          | 555079 | <i>Geobacillus thermoglucosidasius</i>     | 634956 |
| <i>Mycobacterium kansasii</i>               | 557599 | <i>Thermincola potens</i>                  | 635013 |
| <i>Corynebacterium doosanense</i>           | 558173 | <i>Lactobacillus koreensis</i>             | 637971 |
| <i>Mycobacterium leprae</i>                 | 561304 | <i>Segniliparus rotundus</i>               | 640132 |
| <i>Kyrpidia tusciae</i>                     | 562970 | <i>Clostridium lentocellum</i>             | 642492 |
| <i>Ureaplasma urealyticum</i>               | 565575 | <i>Syntrophothermus lipocalidus</i>        | 643648 |
| <i>Enterococcus casseliflavus</i>           | 565655 | <i>Micromonospora aurantiaca</i>           | 644283 |
| <i>Bifidobacterium catenulatum</i>          | 566552 | <i>Arcanobacterium haemolyticum</i>        | 644284 |
|                                             |        | <i>Thermaerobacter marianensis</i>         | 644966 |

|                                                    |        |                                         |        |
|----------------------------------------------------|--------|-----------------------------------------|--------|
| <i>Corynebacterium kroppenstedtii</i>              | 645127 | <i>Pediococcus clausenii</i>            | 701521 |
| <i>Syntrophobotulus glycolicus</i>                 | 645991 | <i>Deinococcus maricopensis</i>         | 709986 |
| <i>Desulfosp. orosinus acidiphilus</i>             | 646529 | <i>Mycobacterium chubuense</i>          | 710421 |
| <i>Micromonospora</i> sp.                          | 648999 | <i>Mycobacterium rhodesiae</i>          | 710685 |
| <i>Truepera radiovictrix</i>                       | 649638 | <i>Intraspora angium calvum</i>         | 710696 |
| <i>Bacillus cellulosilyticus</i>                   | 649639 | <i>Actinomyces</i> sp.                  | 712122 |
| <i>Actinoplanes</i> sp.                            | 649831 | <i>Olsenella</i> sp.                    | 712411 |
| <i>Streptomyces violaceusniger</i>                 | 653045 | <i>Streptococcus</i> sp.                | 712633 |
| <i>Frankia symbiont</i>                            | 656024 | <i>Amycolatopsis mediterranei</i>       | 713604 |
| <i>Arthrobacter alpinus</i>                        | 656366 | <i>Lactobacillus sanfranciscensis</i>   | 714313 |
| <i>Halanaerobium hydrogeniformans</i>              | 656519 | <i>Thermobacillus composti</i>          | 717605 |
| <i>Corynebacterium resistens</i>                   | 662755 | <i>Clostridium clariflavum</i>          | 720554 |
| <i>Mycoplasma genitalium</i>                       | 662945 | <i>Bacillus atrophaeus</i>              | 720555 |
| <i>Ethanoligenens harbinense</i>                   | 663278 | <i>Thermus scotoductus</i>              | 743525 |
| <i>Staphylococcus aureus</i>                       | 663951 | <i>Spiroplasma eriocheiris</i>          | 743698 |
| <i>Bacillus</i> sp.                                | 666686 | <i>Isoptericola variabilis</i>          | 743718 |
| <i>Oceanithermus profundus</i>                     | 670487 | <i>Mycoplasma bovoculi</i>              | 743966 |
| <i>Pseudonocardia dioxanivorans</i>                | 675635 | <i>Mycoplasma yeatsii</i>               | 743967 |
| <i>Streptomyces scabiei</i>                        | 680198 | <i>Mycoplasma flocculare</i>            | 743971 |
| <i>Rothia mucilaginosa</i>                         | 680646 | <i>Deinococcus gobiensis</i>            | 745776 |
| <i>Geobacillus</i> sp.                             | 691437 | <i>Thermodesulfobium narugense</i>      | 747365 |
| <i>Oscillibacter valericigenes</i>                 | 693746 | <i>Halobacteroides halobius</i>         | 748449 |
| <i>Deinococcus proteolyticus</i>                   | 693977 | <i>Clostridium ljungdahlii</i>          | 748727 |
| <i>Desulfotomaculum ruminis</i>                    | 696281 | <i>Streptomyces bingchenggensis</i>     | 749414 |
| <i>Mahella australiensis</i>                       | 697281 | <i>Thermus oshimai</i>                  | 751945 |
| <i>Paenibacillus larvae</i>                        | 697284 | <i>Propionibacterium freudenreichii</i> | 754252 |
| <i>Thermoanaerobacter wiegelsii</i>                | 697303 | <i>Cyanobacterium aponinum</i>          | 755178 |
| <i>Ruminococcus albus</i>                          | 697329 | <i>Clostridium</i> sp.                  | 755731 |
| <i>Staphylococcus lugdunensis</i>                  | 698737 | <i>Desulfotobacterium dehalogenans</i>  | 756499 |
| <i>Amphibacillus xylanus</i>                       | 698758 | <i>Bacillus</i> sp.                     | 756828 |
| <i>Thermoanaerobacterium thermosaccharolyticum</i> | 698948 | <i>Weissella ceti</i>                   | 759620 |
| <i>Corynebacterium diphtheriae</i>                 | 698962 | <i>Desulfotomaculum kuznetsovii</i>     | 760568 |
| <i>Mageeibacillus indolicus</i>                    | 699246 | <i>Streptococcus parasanguinis</i>      | 760570 |
| <i>Coriobacterium glomerans</i>                    | 700015 | <i>Leuconostoc kimchii</i>              | 762051 |
| <i>Mycobacterium neoaurum</i>                      | 700508 | <i>Rothia dentocariosa</i>              | 762948 |
|                                                    |        | <i>Propionibacterium propionicum</i>    | 767029 |

|                                      |        |
|--------------------------------------|--------|
| Lactobacillus delbrueckii            | 767455 |
| Desulfotomaculum gibsoniae           | 767817 |
| Enterococcus hirae                   | 768486 |
| Mycoplasma suis                      | 768700 |
| Desulfofosp.orosinus meridiei        | 768704 |
| Desulfofosp.orosinus orientis        | 768706 |
| Bacillus methanolicus                | 796606 |
| Thermus thermophilus                 | 798128 |
| Spiroplasma mirum                    | 838561 |
| Thermoanaerobacterium xylanolyticum  | 858215 |
| Corynebacterium variabile            | 858619 |
| Kibdelosp.orangium phytohabitans     | 860235 |
| Streptomyces sp.                     | 862751 |
| Streptococcus intermedius            | 862967 |
| Streptococcus constellatus           | 862969 |
| Aerococcus urinae                    | 866775 |
| Halobacillus halophilus              | 866895 |
| Paenibacillus sp.                    | 867076 |
| Desulfotomaculum nigrificans         | 868595 |
| Marinithermus hydrothermalis         | 869210 |
| Dehalobacter restrictus              | 871738 |
| Desulfotobacterium dichloroeliminans | 871963 |
| Desulfotobacterium metallireducens   | 871968 |
| Streptococcus parauberis             | 873447 |
| Mycobacterium sinense                | 875328 |
| Lactobacillus helveticus             | 880633 |
| Paenibacillus polymyxa               | 886882 |
| Eubacterium sulci                    | 888727 |
| Lactobacillus acidophilus            | 891391 |
| Eubacterium limosum                  | 903814 |
| Caldiilinea aerophila                | 926550 |
| Anaerolinea thermophila              | 926569 |
| Streptococcus oralis                 | 927666 |
| Arthrobacter phenanthrenivorans      | 930171 |
| Corynebacterium deserti              | 931089 |

|                                        |         |
|----------------------------------------|---------|
| Clostridium saccharoperbutylacetonicum | 931276  |
| Acetobacterium woodii                  | 931626  |
| Mycoplasma hyorhinis                   | 936139  |
| Deinococcus peraridilitoris            | 937777  |
| Mycoplasma haemofelis                  | 941640  |
| Dehalogenimonas sp.                    | 943347  |
| Mycoplasma fermentans                  | 943945  |
| Tetragenococcus halophilus             | 945021  |
| Mycoplasma bovis                       | 956483  |
| Microbacterium testaceum               | 979556  |
| Leuconostoc sp.                        | 979982  |
| Strawberry lethal                      | 980422  |
| Streptococcus pasteurianus             | 981540  |
| Staphylococcus argenteus               | 985002  |
| Paenibacillus terrae                   | 985665  |
| Staphylococcus agnetis                 | 985762  |
| Streptococcus gallolyticus             | 990317  |
| Clostridium                            | 991789  |
| Clostridium acetobutylicum             | 991791  |
| Lactobacillus casei                    | 998820  |
| Solibacillus silvestris                | 1002809 |
| Streptomyces cattleya                  | 1003195 |
| Mycoplasma gallisepticum               | 1006581 |
| Lactobacillus ginsenosidimutans        | 1007676 |
| Candidatus Arthromitus                 | 1029718 |
| Microlunatus phosp.hovorus             | 1032480 |
| Lactobacillus kefiranoferiens          | 1033837 |
| Paenibacillus mucilaginosus            | 1036673 |
| Candidatus Arthromitus                 | 1041504 |
| Clostridium sp.                        | 1042156 |
| Brevibacillus laterosporus             | 1042163 |
| Bifidobacterium animalis               | 1042403 |
| Oenococcus oeni                        | 1045004 |
| Weissella koreensis                    | 1045854 |
| Streptococcus salivarius               | 1048332 |

|                                       |         |                                   |         |
|---------------------------------------|---------|-----------------------------------|---------|
| Alicyclobacillus acidocaldarius       | 1048834 | Dehalobacter sp.                  | 1131462 |
| Corynebacterium epidermidicanis       | 1050174 | Nocardia brasiliensis             | 1133849 |
| Streptococcus equi                    | 1051072 | Streptomyces hygroscopicus        | 1133850 |
| Sulfobacillus acidophilus             | 1051632 | Gordonia sp.                      | 1136941 |
| Streptococcus pseudopneumoniae        | 1054460 | Mycobacterium intracellulare      | 1138383 |
| Amycolatopsis methanolica             | 1068978 | Mycobacterium yongonense          | 1138871 |
| Streptococcus infantarius             | 1069533 | Lysinibacillus varians            | 1145276 |
| Lactobacillus ruminis                 | 1069534 | Blastococcus saxosidens           | 1146883 |
| Corynebacterium uterequi              | 1072256 | Bifidobacterium asteroides        | 1147128 |
| Paenibacillus riograndensis           | 1073571 | Dehalobacter sp.                  | 1147129 |
| Lactobacillus heilongjiangensis       | 1074467 | Bifidobacterium dentium           | 1150423 |
| Streptococcus lutetiensis             | 1076934 | Bifidobacterium kashiwanohense    | 1150460 |
| Leptolyngbya sp.                      | 1080068 | Bifidobacterium scardovii         | 1150461 |
| Exiguobacterium antarcticum           | 1087448 | Scardovia inopinata               | 1150468 |
| Thermacetogenium phaeum               | 1089553 | Streptococcus sp.                 | 1156431 |
| Thermoanaerobacterium saccharolyticum | 1094508 | Streptococcus sp.                 | 1156433 |
| Pseudonocardia sp.                    | 1096856 | Amycolatopsis orientalis          | 1156913 |
| Pseudonocardia sp.                    | 1096868 | Ruminococcus bicirculans          | 1160721 |
| Lactococcus lactis                    | 1104322 | Leuconostoc gelidum               | 1165892 |
| Geobacillus thermoleovorans           | 1111068 | Mycobacterium sp.                 | 1168287 |
| Thermus sp.                           | 1111069 | Propionibacterium avidum          | 1170318 |
| Mycoplasma haemocanis                 | 1111676 | Calothrix sp.                     | 1170562 |
| Gordonia polyisoprenivorans           | 1112204 | Propionibacterium acidipropionici | 1171373 |
| Spiroplasma atrichopogonis            | 1114980 | Streptomyces globisporus          | 1172567 |
| Streptococcus macedonicus             | 1116231 | Crinalium epipsammum              | 1173022 |
| Arthrobacter sp.                      | 1118963 | Geitlerinema sp.                  | 1173025 |
| Clostridium stercoarium               | 1121335 | Gloeocapsa sp.                    | 1173026 |
| Corynebacterium callunae              | 1121353 | Microcoleus sp.                   | 1173027 |
| Corynebacterium halotolerans          | 1121362 | Synechococcus sp.                 | 1173263 |
| Bacillus amyloliquefaciens            | 1126211 | Saccharothrix sp. anaensis        | 1179773 |
| Paenibacillus beijingensis            | 1126833 | Deinococcus swuensis              | 1182571 |
| Nocardia cyriacigeorgica              | 1127134 | Gloeobacter kilaeensis            | 1183438 |
| Bacillus sp.                          | 1127744 | Staphylococcus warneri            | 1194526 |
| Clostridium acidurici                 | 1128398 | Mycoplasma wenyonii               | 1197325 |
| Lactobacillus mucosae                 | 1130798 | Corynebacterium terpenotabidum    | 1200352 |
|                                       |         | Mycobacterium haemophilum         | 1202450 |

|                                 |         |                                  |         |
|---------------------------------|---------|----------------------------------|---------|
| Nocardiopsis alba               | 1205910 | Staphylococcus pasteurii         | 1276282 |
| Tepidanaerobacter acetatoxydans | 1209989 | Synechococcus sp.                | 1280380 |
| Candidatus Mycoplasma           | 1212765 | Lactobacillus plantarum          | 1284663 |
| Streptomyces collinus           | 1214242 | Corynebacterium casei            | 1285583 |
| Clostridium bornimense          | 1216932 | Eubacterium acidaminophilum      | 1286171 |
| Corynebacterium humireducens    | 1223515 | Lactobacillus hokkaidonensis     | 1291742 |
| Corynebacterium marinum         | 1224162 | Mycoplasma putrefaciens          | 1292033 |
| Corynebacterium maris           | 1224163 | Intestinimonas butyriciproducens | 1297617 |
| Corynebacterium vitaeruminis    | 1224164 | Enterococcus mundtii             | 1300150 |
| cyanobacterium endosymbiont     | 1228987 | Streptococcus oligofermentans    | 1302863 |
| Leuconostoc carnosum            | 1229758 | Mycobacterium abscessus          | 1303024 |
| Clostridium tetani              | 1231072 | Streptomyces fulvissimus         | 1303692 |
| Mycobacterium indicus           | 1232724 | Deinococcus soli                 | 1309411 |
| Geobacillus sp.                 | 1233873 | Streptococcus agalactiae         | 1309807 |
| Propionibacterium acnes         | 1234380 | Ilumatobacter coccineus          | 1313172 |
| Carnobacterium maltaromaticum   | 1234679 | Acholeplasma palmae              | 1318466 |
| Bacillus lehensis               | 1246626 | Candidatus Mycoplasma            | 1318617 |
| Mycoplasma cynos                | 1246955 | Streptococcus iniae              | 1318633 |
| Actinoplanes friuliensis        | 1246995 | Bacillus bombysepticus           | 1330043 |
| Streptococcus dysgalactiae      | 1247189 | Calothrix sp.                    | 1337936 |
| Bifidobacterium thermophilum    | 1254439 | Streptococcus suis               | 1340847 |
| Streptomyces sp.                | 1262452 | Clostridium autoethanogenum      | 1341692 |
| Streptomyces sp.                | 1265601 | Bifidobacterium indicum          | 1341694 |
| Staphylococcus pseudintermedius | 1266717 | Clostridium saccharobutylicum    | 1345695 |
| Carnobacterium inhibens         | 1266845 | Geobacillus sp.                  | 1345697 |
| Mycoplasma hominis              | 1267000 | Bacillus megaterium              | 1348623 |
| Mycoplasma synoviae             | 1267001 | Corynebacterium argenteratense   | 1348662 |
| Paenibacillus sabiniae          | 1268072 | Synechococcus sp.                | 1350461 |
| Mycobacterium sp.               | 1273687 | Streptococcus anginosus          | 1353243 |
| Spiroplasma taiwanense          | 1276220 | Bacillus infantis                | 1367477 |
| Spiroplasma diminutum           | 1276221 | Lactobacillus fermentum          | 1381124 |
| Spiroplasma chrysopicola        | 1276227 | Adlercreutzia equolifaciens      | 1384484 |
| Spiroplasma syrphidicola        | 1276229 | Leifsonia xyli                   | 1389489 |
| Spiroplasma culicicola          | 1276246 | Exiguobacterium sp.              | 1399115 |
| Spiroplasma sabaudiense         | 1276257 | Lactobacillus gasseri            | 1403312 |
| Spiroplasma apis                | 1276258 | Mycoplasma parvum                | 1403316 |

|                                    |         |                             |         |
|------------------------------------|---------|-----------------------------|---------|
| Streptomyces lydicus               | 1403539 | Dehalococcoides sp.         | 1522671 |
| Corynebacterium glyciniphilum      | 1404245 | Planococcus sp.             | 1526927 |
| Mesoplasma florum                  | 1406864 | Corynebacteriales bacterium | 1528099 |
| Corynebacterium lactis             | 1408189 | Coriobacteriaceae bacterium | 1531429 |
| Corynebacterium ulcerans           | 1408268 | Paenibacillus sp.           | 1536769 |
| Clostridium botulinum              | 1408283 | Paenibacillus sp.           | 1536770 |
| Nocardia nova                      | 1415166 | Paenibacillus sp.           | 1536771 |
| Mycoplasma ovis                    | 1415773 | Paenibacillus sp.           | 1536772 |
| Clostridium baratii                | 1415775 | Paenibacillus sp.           | 1536773 |
| Bacillus toyonensis                | 1415784 | Paenibacillus sp.           | 1536774 |
| Streptococcus sp.                  | 1419814 | Paenibacillus sp.           | 1536775 |
| Bacillus methylotrophicus          | 1423138 | Mollicutes bacterium        | 1541959 |
| Candidatus Hepatoplasma            | 1427984 | Lactobacillus sp.           | 1545702 |
| Clostridium pasteurianum           | 1428454 | Mycobacterium sp.           | 1545728 |
| Streptomyces albulus               | 1434306 | Corynebacteriales bacterium | 1562462 |
| Trueperella pyogenes               | 1435056 | Rhodococcus sp.             | 1564114 |
| Rhodococcus pyridinivorans         | 1435356 | Carnobacterium sp.          | 1564681 |
| Streptomyces leeuwenhoekii         | 1437453 | Bacillus sp.                | 1565991 |
| Bifidobacterium actinocoloniiforme | 1437605 | Paenibacillus sp.           | 1566358 |
| Mycoplasma pneumoniae              | 1441379 | Bacillus sp.                | 1570330 |
| Bacillus sp.                       | 1446792 | Bacillus sp.                | 1574141 |
| Bifidobacterium pseudolongum       | 1447715 | Arthrobacter sp.            | 1588023 |
| Kutzneria albida                   | 1449976 | Geminocystis sp.            | 1615909 |
| Aneurinibacillus sp.               | 1450761 | Paenibacillus bovis         | 1616788 |
| Corynebacterium falsenii           | 1451189 | Geminocystis sp.            | 1617448 |
| Candidatus Atelocyanobacterium     | 1453429 | Arthrobacter sp.            | 1618207 |
| Amycolatopsis lurida               | 1460371 | Bacillus sp.                | 1628753 |
| Jeotgalicoccus sp.                 | 1461582 | Geobacillus sp.             | 1629723 |
| Lentibacillus amyloliquefaciens    | 1472767 | Microcystis panniformis     | 1638788 |
| Corynebacterium sp.                | 1487956 | Pseudonocardia sp.          | 1641402 |
| Arthrobacter sp.                   | 1494608 | Anabaena sp.                | 1647413 |
| Prochlorococcus sp.                | 1501268 | Bacillus paralicheniformis  | 1648923 |
| Prochlorococcus sp.                | 1501269 | Streptomyces sp.            | 1649184 |
| Jeotgalibacillus sp.               | 1508404 | Actinobacteria bacterium    | 1650658 |
| Candidatus Arthromitus             | 1508644 | Arthrobacter sp.            | 1652545 |
| Geobacillus sp.                    | 1519377 | Arsenicicoccus sp.          | 1658671 |

|                    |         |                           |         |
|--------------------|---------|---------------------------|---------|
| Herbinix sp.       | 1679721 | Nostoc sp.                | 1751286 |
| Pseudonocardia sp. | 1688404 | Streptomyces sp.          | 1751294 |
| Arthrobacter sp.   | 1690248 | Fischerella sp.           | 1752063 |
| Paenibacillus sp.  | 1695218 | Leptolyngbya sp.          | 1752064 |
| Microbacterium sp. | 1696072 | Deinococcus actinosclerus | 1768108 |
| Arthrobacter sp.   | 1704044 | Arthrobacter sp.          | 1771959 |
| Microbacterium sp. | 1714373 | Bacillus sp.              | 1774743 |
| Streptomyces sp.   | 1725411 | Gemella sp.               | 1785995 |
| Mycoplasma sp.     | 1749074 | Microbacterium sp.        | 1795053 |
| Kurthia sp.        | 1750719 |                           |         |

**Table S11** List of *Deinococcus-Thermus* (DT) species kept during permutations under LOW sampling scenarios.

|       |                                              |       |                                               |
|-------|----------------------------------------------|-------|-----------------------------------------------|
| LOW1  | <i>Deinococcus actinosclerus</i>             | LOW11 | <i>Marinithermus hydrothermalis</i> DSM 14884 |
| LOW2  | <i>Deinococcus deserti</i> VCD115            | LOW12 | <i>Meiothermus silvanus</i> DSM 9946          |
| LOW3  | <i>Deinococcus geothermalis</i> DSM 11300    | LOW13 | <i>Oceanithermus profundus</i> DSM 14977      |
| LOW4  | <i>Deinococcus gobiensis</i> I-0             | LOW14 | <i>Thermus aquaticus</i> Y51MC23              |
| LOW5  | <i>Deinococcus maricopensis</i> DSM 21211    | LOW15 | <i>Thermus oshimai</i> JL-2                   |
| LOW6  | <i>Deinococcus peraridilitoris</i> DSM 19664 | LOW16 | <i>Thermus parvatiensis</i>                   |
| LOW7  | <i>Deinococcus proteolyticus</i> MRP         | LOW17 | <i>Thermus scotoductus</i> SA-01              |
| LOW8  | <i>Deinococcus radiodurans</i> R1            | LOW18 | <i>Thermus</i> sp. CCB US3 UF1                |
| LOW9  | <i>Deinococcus soli</i> Cha et al            | LOW19 | <i>Thermus thermophilus</i> JL-18             |
| LOW10 | <i>Deinococcus swuensis</i>                  | LOW20 | <i>Truepera radiovictrix</i> DSM 17093        |

**Table S12** List of *Chloroflexi* (CHF) species kept during permutations under LOW sampling scenarios.

|      |                                                   |      |                                                     |
|------|---------------------------------------------------|------|-----------------------------------------------------|
| LOW1 | <i>Anaerolinea thermophila</i> UNI-1              | LOW5 | <i>Chloroflexus</i> sp. Y-400-fl                    |
| LOW2 | <i>Caldilinea aerophila</i> DSM 14535 NBRC 104270 | LOW6 | <i>Dehalococcoides mccartyi</i> 195                 |
| LOW3 | <i>Chloroflexus aggregans</i> DSM 9485            | LOW7 | <i>Dehalococcoides</i> sp. UCH007                   |
| LOW4 | <i>Chloroflexus aurantiacus</i> J-10-fl           | LOW8 | <i>Dehalogenimonas lykanthroporepellens</i> BL-DC-9 |



|       |                                       |       |                                         |
|-------|---------------------------------------|-------|-----------------------------------------|
| LOW9  | Dehalogenimonas sp.<br>WBC-2          | LOW12 | Roseiflexus sp. RS-1                    |
| LOW10 | Herpetosiphon aurantiacus<br>DSM 785  | LOW13 | Sphaerobacter<br>thermophilus DSM 20745 |
| LOW11 | Roseiflexus castenholzii<br>DSM 13941 | LOW14 | Thermomicrobium roseum<br>DSM 5159      |

**Table S13** List of Actinobacteria (ACT) species kept during permutations under LOW sampling scenarios.

|       |                                                                                                 |
|-------|-------------------------------------------------------------------------------------------------|
| LOW1  | Amycolatopsis japonica.208439, Arthrobacter LS16.1690248, Corynebacterium argentoratense        |
| LOW2  | Bifidobacterium dentium, Corynebacterium jeikeium, Corynebacterium terpenotabidum               |
| LOW3  | Devriesea agamarum.472569, Micrococcus luteus, Rubrobacter xylanophilus                         |
| LOW4  | Frankia Eul1c.298654, Frankia symbiont, Gardnerella vaginalis                                   |
| LOW5  | Corynebacteriales bacterium, Mycobacterium KMS.189918, Streptomyces griseus                     |
| LOW6  | Corynebacterium terpenotabidum, Intraspangium calvum, Salinispora arenicola                     |
| LOW7  | Corynebacterium halotolerans, Microlunatus phosphovorus, Mycobacterium VKM                      |
| LOW8  | Rathayibacter toxicus.145458, Rhodococcus opacus, Rhodococcus B7740.1564114                     |
| LOW9  | Arthrobacter phenanthrenivorans, Blastococcus saxosidens, Propionibacterium propionicum         |
| LOW10 | Corynebacterium diphtheriae, Eggerthella lenta, Thermomonospora curvata                         |
| LOW11 | Corynebacterium argentoratense, Mycobacterium goodii.134601, Mycobacterium JLS.164757           |
| LOW12 | Corynebacterium diphtheriae, Corynebacterium ATCC, Propionibacterium acnes                      |
| LOW13 | Kibdelosporangium phytohabitans.860235, Scardovia inopinata, Streptomyces leeuwenhoekii.1437453 |
| LOW14 | Actinoplanes SE50, Arthrobacter sulfonivorans.121292, Microterricola viridarii.412690           |
| LOW15 | Bifidobacterium longum, Corynebacterium ureicelerivorans.401472, Nocardiosis alba               |
| LOW16 | Bifidobacterium dentium, Corynebacterium imitans.156978, Corynebacterium ulcerans               |
| LOW17 | Clavibacter michiganensis, Corynebacterium urealyticum, Intraspangium calvum                    |
| LOW18 | Bifidobacterium thermophilum, Mycobacterium KMS.189918, Tropheryma whipplei                     |
| LOW19 | Micromonospora aurantiaca, Streptomyces pratensis, Streptomyces violaceusniger                  |
| LOW20 | Actinotignum schaalii.59505, Corynebacterium argentoratense, Gordonia KTR9.337191               |

**Table S14** List of Deinococcus-Thermus (DT) species kept during permutations under MID sampling scenarios.

|      |                                                                                                                                                                                                                                                                                                                |
|------|----------------------------------------------------------------------------------------------------------------------------------------------------------------------------------------------------------------------------------------------------------------------------------------------------------------|
| MID1 | Deinococcus actinosclerus, Deinococcus deserti VCD115, Deinococcus geothermalis DSM 11300, Deinococcus gobiensis I-0, Deinococcus maricopenensis DSM 21211, Deinococcus peraridilitoris DSM 19664, Deinococcus proteolyticus MRP, Deinococcus radiodurans R1, Deinococcus soli Cha et al, Deinococcus swuensis |
| MID2 | Thermus aquaticus Y51MC23, Thermus oshimai JL-2, Thermus parvatiensis, Thermus scotoductus SA-01, Thermus sp. CCB US3 UF1, Thermus thermophilus JL-18                                                                                                                                                          |

**Table S15** List of Chloroflexi (CHF) species kept during permutations under MID sampling scenarios.

|      |                                                                             |
|------|-----------------------------------------------------------------------------|
| MID1 | Chloroflexus aggregans, Chloroflexus aurantiacus, Chloroflexus sp. Y-400-fl |
| MID2 | Dehalococcoides mccartyi, Dehalococcoides sp. UCH007,                       |
| MID3 | Dehalogenimonas lykanthroporepellens, Dehalogenimonas sp. WBC-2.943347,     |
| MID4 | Roseiflexus sp. RS-1, Roseiflexus castenholzii,                             |

**Table S16** List of Actinobacteria (ACT) species kept during permutations under MID ancestry sampling scenarios.

|              |                                                                                                                                                                                                                                                                                                                                                                                                                                                                                                                                                                                                                                                                                                                                                                                                                                                                                                                                                                                                                                                                                                                                                                                                                                                                                                                                                                                                                                                                                                                                                                                                                                                                                                                                                                                                                                                                                                                                                                                                                                                                                                                                                                                                                                                                                                                                                                                                                                                                                                                                                                                                                                                                                                                                                                                                                                         |
|--------------|-----------------------------------------------------------------------------------------------------------------------------------------------------------------------------------------------------------------------------------------------------------------------------------------------------------------------------------------------------------------------------------------------------------------------------------------------------------------------------------------------------------------------------------------------------------------------------------------------------------------------------------------------------------------------------------------------------------------------------------------------------------------------------------------------------------------------------------------------------------------------------------------------------------------------------------------------------------------------------------------------------------------------------------------------------------------------------------------------------------------------------------------------------------------------------------------------------------------------------------------------------------------------------------------------------------------------------------------------------------------------------------------------------------------------------------------------------------------------------------------------------------------------------------------------------------------------------------------------------------------------------------------------------------------------------------------------------------------------------------------------------------------------------------------------------------------------------------------------------------------------------------------------------------------------------------------------------------------------------------------------------------------------------------------------------------------------------------------------------------------------------------------------------------------------------------------------------------------------------------------------------------------------------------------------------------------------------------------------------------------------------------------------------------------------------------------------------------------------------------------------------------------------------------------------------------------------------------------------------------------------------------------------------------------------------------------------------------------------------------------------------------------------------------------------------------------------------------------|
| MIDanc3<br>2 | Streptomyces albus ZPM, Streptomyces albus, Streptomyces ambofaciens ATCC 23877, Streptomyces avermitilis MA-4680 = NBRC 14893, Streptomyces bingchenggensis BCW-1, Streptomyces cattleya NRRL 8057 = DSM 46488, Streptomyces collinus Tu 365, Streptomyces cyaneogriseus subsp. noncyanogenus, Streptomyces fulvissimus DSM 40593, Streptomyces glaucescens, Streptomyces globisporus C-1027, Streptomyces griseus subsp. griseus NBRC 13350, Streptomyces hygroscopicus subsp. jinggangensis 5008, Streptomyces leeuwenhoekii, Streptomyces lydicus A02, Streptomyces pratensis ATCC 33331, Streptomyces pristinaespiralis, Streptomyces reticuli, Streptomyces scabiei 87.22, Streptomyces sp. 4F, Streptomyces sp. 769, Streptomyces sp. CdTB01, Streptomyces sp. CFMR 7, Streptomyces sp. CNQ-509, Streptomyces sp. Mg1, Streptomyces sp. PAMC26508, Streptomyces sp. SirexAA-E, Streptomyces venezuelae, Streptomyces vietnamensis, Streptomyces violaceusniger Tu 4113, Streptomyces xiamenensis, Streptoporangium roseum DSM 43021, Thermobifida fusca YX                                                                                                                                                                                                                                                                                                                                                                                                                                                                                                                                                                                                                                                                                                                                                                                                                                                                                                                                                                                                                                                                                                                                                                                                                                                                                                                                                                                                                                                                                                                                                                                                                                                                                                                                                                       |
| MIDanc1<br>7 | Actinosynnema mirum DSM 43827, Amycolatopsis japonica, Amycolatopsis lurida NRRL 2430, Amycolatopsis mediterranei S699, Amycolatopsis methanolica 239, Amycolatopsis orientalis HCCB10007, Kibdelosporangium phytohabitans, Kutzneria albida DSM 43870, Pseudonocardia dioxanivorans CB1190, Pseudonocardia sp. AL041005-10, Pseudonocardia sp. EC080610-09, Pseudonocardia sp. EC080619-01, Pseudonocardia sp. EC080625-04, Pseudonocardia sp. HH130629-09, Saccharomonospora viridis DSM 43017, Saccharopolyspora erythraea NRRL 2338, Saccharothrix espanaensis DSM 44229                                                                                                                                                                                                                                                                                                                                                                                                                                                                                                                                                                                                                                                                                                                                                                                                                                                                                                                                                                                                                                                                                                                                                                                                                                                                                                                                                                                                                                                                                                                                                                                                                                                                                                                                                                                                                                                                                                                                                                                                                                                                                                                                                                                                                                                            |
| MIDanc1<br>0 | Aeromicrobium erythreum, Kribbella flavida DSM 17836, Microlunatus phosphovorus NM-1, Nocardioides sp. JS614, Pimelobacter simplex, Propionibacterium acidipropionici ATCC 4875, Propionibacterium acnes C1, Propionibacterium avidum 44067, Propionibacterium freudenreichii subsp. shermanii CIRM-BIA1, Propionibacterium propionicum F0230a                                                                                                                                                                                                                                                                                                                                                                                                                                                                                                                                                                                                                                                                                                                                                                                                                                                                                                                                                                                                                                                                                                                                                                                                                                                                                                                                                                                                                                                                                                                                                                                                                                                                                                                                                                                                                                                                                                                                                                                                                                                                                                                                                                                                                                                                                                                                                                                                                                                                                          |
| MIDanc8<br>6 | Atopobium parvulum DSM 20469, Coriobacteriaceae bacterium 68-1-3, Coriobacterium glomerans PW2, Olsenella sp. oral taxon 807, Olsenella uli DSM 7084, Amycolicococcus subflavus DQS3-9A1, [Brevibacterium] flavum, Corynebacteriales bacterium X1036, Corynebacteriales bacterium X1698, Corynebacterium argentoratense DSM 44202, Corynebacterium atypicum, Corynebacterium aurimucosum ATCC 700975, Corynebacterium callunae DSM 20147, Corynebacterium camporealensis, Corynebacterium casei LMG S-19264, Corynebacterium deserti GIMN1.010, Corynebacterium diphtheriae 31A, Corynebacterium doosanense CAU 212 = DSM 45436, Corynebacterium efficiens YS-314, Corynebacterium epidermidicanis, Corynebacterium falsenii DSM 44353, Corynebacterium glutamicum R, Corynebacterium glyciniphilum AJ 3170, Corynebacterium halotolerans YIM 70093 = DSM 44683, Corynebacterium humireducens NBRC 106098 = DSM 45392, Corynebacterium imitans, Corynebacterium jeikeium K411, Corynebacterium kroppenstedtii DSM 44385, Corynebacterium kutscheri, Corynebacterium lactis RW2-5, Corynebacterium marinum DSM 44953, Corynebacterium maris DSM 45190, Corynebacterium mustelae, Corynebacterium pseudotuberculosis, Corynebacterium resistens DSM 45100, Corynebacterium singulare, Corynebacterium sp. ATCC 6931, Corynebacterium stationis, Corynebacterium terpenotabidum Y-11, Corynebacterium testudinoris, Corynebacterium ulcerans FRC58, Corynebacterium urealyticum DSM 7109, Corynebacterium ureicelerivorans, Corynebacterium uterequi, Corynebacterium variabile DSM 44702, Corynebacterium vitaeruminis DSM 20294, Gordonia bronchialis DSM 43247, Gordonia polyisoprenivorans VH2, Gordonia sp. KTR9, Gordonia sp. QH-11, Mycobacterium abscessus subsp. bolletii 50594, Mycobacterium africanum, Mycobacterium avium 104, Mycobacterium bovis BCG, Mycobacterium chubuense NBB4, Mycobacterium fortuitum, Mycobacterium gilvum PYR-GCK, Mycobacterium goodii, Mycobacterium haemophilum DSM 44634, Mycobacterium indicus pranii MTCC 9506, Mycobacterium intracellulare MOTT-64, Mycobacterium kansasii ATCC 12478, Mycobacterium leprae Br4923, Mycobacterium liflandii 128FXT, Mycobacterium marinum M, Mycobacterium microti, Mycobacterium neoaurum VKM Ac-1815D, Mycobacterium rhodesiae NBB3, Mycobacterium sinense, Mycobacterium sp. EPa45, Mycobacterium sp. JLS, Mycobacterium sp. JS623, Mycobacterium sp. KMS, Mycobacterium sp. MCS, Mycobacterium sp. MOTT36Y, Mycobacterium sp. VKM Ac-1817D, Mycobacterium tuberculosis, Mycobacterium ulcerans AgY99, Mycobacterium vanbaalenii PYR-1, Mycobacterium yongonense 05-1390, Nocardia brasiliensis ATCC 700358, Nocardia cyriacigeorgica GUH-2, Nocardia farcinica, Nocardia nova SH22a, Rhodococcus erythropolis PR4, Rhodococcus jostii RHA1, Rhodococcus |

opacus PD630, Rhodococcus pyridinivorans SB3094, Rhodococcus sp. B7740, Segniliparus rotundus DSM 44985, Tsukamurella paurometabola DSM 20162

MIDanc1  
9 Bifidobacterium actinocoloniiforme DSM 22766, Bifidobacterium adolescentis, Bifidobacterium angulatum DSM 20098 = JCM 7096, Bifidobacterium animalis subsp. lactis CNCM I-2494, Bifidobacterium asteroides PRL2011, Bifidobacterium bifidum, Bifidobacterium breve, Bifidobacterium catenulatum DSM 16992 = JCM 1194 = LMG 11043, Bifidobacterium coryneforme, Bifidobacterium dentium JCM 1195 = DSM 20436, Bifidobacterium indicum LMG 11587 = DSM 20214, Bifidobacterium kashiwanohense JCM 15439 = DSM 21854, Bifidobacterium longum subsp. infantis ATCC 15697 = JCM 1222 = DSM 20088, Bifidobacterium pseudocatenulatum DSM 20438 = JCM 1200 = LMG 10505, Bifidobacterium pseudolongum PV8-2, Bifidobacterium scardovii JCM 12489 = DSM 13734, Bifidobacterium thermophilum RBL67, Gardnerella vaginalis ATCC 14019, Scardovia inopinata JCM 12537

**Table S17** List of Deinococcus-Thermus (DT) species removed during permutations under HIGH sampling scenarios.

|        |                                       |        |                                        |
|--------|---------------------------------------|--------|----------------------------------------|
| HIGH1  | Deinococcus actinosclerus             | HIGH11 | Marinithermus hydrothermalis DSM 14884 |
| HIGH2  | Deinococcus deserti VCD115            | HIGH12 | Meiothermus silvanus DSM 9946          |
| HIGH3  | Deinococcus geothermalis DSM 11300    | HIGH13 | Oceanithermus profundus DSM 14977      |
| HIGH4  | Deinococcus gobiensis I-0             | HIGH14 | Thermus aquaticus Y51MC23              |
| HIGH5  | Deinococcus maricopensis DSM 21211    | HIGH15 | Thermus oshimai JL-2                   |
| HIGH6  | Deinococcus peraridilitoris DSM 19664 | HIGH16 | Thermus parvatiensis                   |
| HIGH7  | Deinococcus proteolyticus MRP         | HIGH17 | Thermus scotoductus SA-01              |
| HIGH8  | Deinococcus radiodurans R1            | HIGH18 | Thermus sp. CCB US3 UF1                |
| HIGH9  | Deinococcus soli Cha et al            | HIGH19 | Thermus thermophilus JL-18             |
| HIGH10 | Deinococcus swuensis                  | HIGH20 | Truepera radiovictrix DSM 17093        |

**Table S18** List of Chloroflexi (CHF) species removed during permutations under HIGH sampling scenarios.

|        |                                              |
|--------|----------------------------------------------|
| HIGH1  | Anaerolinea thermophila UNI-1                |
| HIGH2  | Caldiilinea aerophila DSM 14535 NBRC 104270  |
| HIGH3  | Chloroflexus aggregans DSM 9485              |
| HIGH4  | Chloroflexus aurantiacus J-10-fl             |
| HIGH5  | Chloroflexus sp. Y-400-fl                    |
| HIGH6  | Dehalococcoides mccartyi 195                 |
| HIGH7  | Dehalococcoides sp. UCH007                   |
| HIGH8  | Dehalogenimonas lykanthroporepellens BL-DC-9 |
| HIGH9  | Dehalogenimonas sp. WBC-2                    |
| HIGH10 | Herpetosiphon aurantiacus DSM 785            |
| HIGH11 | Roseiflexus castenholzii DSM 13941           |
| HIGH12 | Roseiflexus sp. RS-1                         |
| HIGH13 | Sphaerobacter thermophilus DSM 20745         |
| HIGH14 | Thermomicrobium roseum DSM 5159              |

**1 Table S19** List of Actinobacteria (ACT) species removed during permutations under HIGH sampling scenarios.

|       |                                                                                                                                                                                                                                                                                                                                                                                                                                                                                                                                                                                                                                                                                                                                                                                                                                                                                                                                                                              |
|-------|------------------------------------------------------------------------------------------------------------------------------------------------------------------------------------------------------------------------------------------------------------------------------------------------------------------------------------------------------------------------------------------------------------------------------------------------------------------------------------------------------------------------------------------------------------------------------------------------------------------------------------------------------------------------------------------------------------------------------------------------------------------------------------------------------------------------------------------------------------------------------------------------------------------------------------------------------------------------------|
| HIGH1 | <i>Bifidobacterium coryneforme</i> .1687, <i>Conexibacter woesei</i> , <i>Corynebacteriales bacterium</i> , <i>Corynebacterium aurimucosum</i> , <i>Corynebacterium ulcerans</i> , <i>Geodermatophilus obscurus</i> , <i>Kocuria rhizophila</i> , <i>Kribbella flavida</i> , <i>Microbacterium</i> sp. CGR1.1696072, <i>Mobiluncus curtisii</i> , <i>Mycobacterium</i> sp. KMS.189918, <i>Nocardiopsis dassonvillei</i> , <i>Pseudonocardia</i> sp. EC080625-04.1096868, <i>Renibacterium salmoninarum</i> , <i>Rhodococcus pyridinivorans</i> , <i>Streptomyces albus</i> , <i>Streptomyces albus</i> .1888, <i>Streptomyces avermitilis</i> , <i>Streptomyces glaucescens</i> .1907, <i>Streptomyces hygroscopicus</i> , <i>Streptomyces leeuwenhoekii</i> .1437453, <i>Streptomyces lydicus</i> , <i>Streptomyces pratensis</i> , <i>Streptomyces scabiei</i> , <i>Streptomyces</i> sp. SirexAA-E.862751, <i>Verrucosipora maris</i>                                      |
| HIGH2 | <i>Acidimicrobium ferrooxidans</i> , <i>Actinomyces meyeri</i> .52773, <i>Arthrobacter aurescens</i> , <i>Bifidobacterium thermophilum</i> , <i>Blastococcus saxosidans</i> , <i>Clavibacter michiganensis</i> , <i>Corynebacterium casei</i> , <i>Corynebacterium epidermidicanis</i> .1050174, <i>Corynebacterium terpenotabidum</i> , <i>Corynebacterium uterequi</i> .1072256, <i>Frankia alni</i> , <i>Frankia</i> sp. Ccl3.106370, <i>Geodermatophilus obscurus</i> , <i>Gordonia</i> sp. QH-11.1136941, <i>Jonesia denitrificans</i> , <i>Mobiluncus curtisii</i> , <i>Mycobacterium indicus</i> , <i>Mycobacterium neoaurum</i> , <i>Mycobacterium sinense</i> .875328, <i>Nocardioideis</i> sp. JS614.196162, <i>Propionibacterium freudenreichii</i> , <i>Rhodoluna laticola</i> .529884, <i>Streptomyces cyaneogriseus</i> , <i>Streptomyces</i> sp. 4F.1751294, <i>Streptomyces venezuelae</i> .54571, <i>Verrucosipora maris</i>                                |
| HIGH3 | <i>Acidothermus cellulolyticus</i> , <i>Actinotignum schaalii</i> .59505, <i>Arthrobacter</i> sp. A3.595593, <i>Arthrobacter</i> sp. IHBB, <i>Bifidobacterium pseudocatenulatum</i> , <i>Bifidobacterium pseudolongum</i> , <i>Corynebacterium argentoratense</i> , <i>Corynebacterium diphtheriae</i> , <i>Corynebacterium humireducens</i> , <i>Corynebacterium terpenotabidum</i> , <i>Devriesea agamarum</i> .472569, <i>Gordonia</i> sp. QH-11.1136941, <i>Kribbella flavida</i> , <i>Luteipulveratus mongoliensis</i> .571913, <i>Microbacterium</i> sp. CGR1.1696072, <i>Mycobacterium goodii</i> .134601, <i>Nocardia brasiliensis</i> , <i>Nocardia nova</i> , <i>Pimelobacter simplex</i> .2045, <i>Pseudonocardia</i> sp. EC080610-09.1688404, <i>Renibacterium salmoninarum</i> , <i>Rhodococcus erythropolis</i> , <i>Saccharomonospora viridis</i> , <i>Scardovia inopinata</i> , <i>Streptomyces albus</i> , <i>Streptomyces vietnamensis</i> .362257         |
| HIGH4 | <i>Bifidobacterium breve</i> .1685, <i>Bifidobacterium dentium</i> , <i>Bifidobacterium kashiwanohense</i> , <i>Corynebacteriales bacterium</i> , <i>Corynebacterium aurimucosum</i> , <i>Corynebacterium diphtheriae</i> , <i>Corynebacterium imitans</i> .156978, <i>Corynebacterium stationis</i> .1705, <i>Eggerthella lenta</i> , <i>Kocuria palustris</i> .71999, <i>Leifsonia xyli</i> , <i>Microbacterium</i> sp. XT11.367477, <i>Microbacterium testaceum</i> , <i>Micromonospora</i> sp. L5.648999, <i>Mycobacterium africanum</i> .33894, <i>Mycobacterium neoaurum</i> , <i>Mycobacterium</i> sp. MOTT36Y.1168287, <i>Nocardia cyriacigeorgica</i> , <i>Nocardia nova</i> , <i>Propionibacterium avidum</i> , <i>Rhodococcus erythropolis</i> , <i>Rothia mucilaginosa</i> , <i>Streptomyces ambofaciens</i> , <i>Streptomyces cyaneogriseus</i> , <i>Streptomyces</i> sp. PAMC26508.1265601, <i>Thermobifida fusca</i>                                          |
| HIGH5 | <i>Actinobacteria bacterium</i> , <i>Actinoplanes missouriensis</i> , <i>Actinoplanes</i> sp. N902-109.649831, <i>Aeromicrobium erythreum</i> .2041, <i>Arthrobacter</i> sp. A3.595593, <i>Beutenbergia cavernae</i> , <i>Bifidobacterium catenulatum</i> , <i>Bifidobacterium longum</i> , <i>Corynebacterium casei</i> , <i>Corynebacterium epidermidicanis</i> .1050174, <i>Corynebacterium falsenii</i> , <i>Corynebacterium glyciniphilum</i> , <i>Corynebacterium halotolerans</i> , <i>Leifsonia xyli</i> , <i>Micrococcus phosphovorus</i> , <i>Mycobacterium abscessus</i> , <i>Mycobacterium bovis</i> , <i>Mycobacterium marinum</i> , <i>Mycobacterium</i> sp. MCS.164756, <i>Nocardioideis</i> sp. JS614.196162, <i>Olsenella uli</i> , <i>Pseudonocardia</i> sp. EC080610-09.1688404, <i>Rathayibacter toxicus</i> .145458, <i>Renibacterium salmoninarum</i> , <i>Rhodococcus opacus</i> , <i>Streptomyces</i> sp. CdTB01.1725411, <i>Verrucosipora maris</i> |
| HIGH6 | <i>Actinomyces meyeri</i> .52773, <i>Actinoplanes</i> sp. N902-109.649831, <i>Bifidobacterium breve</i> .1685, <i>Bifidobacterium dentium</i> , <i>Bifidobacterium kashiwanohense</i> , <i>Bifidobacterium thermophilum</i> , <i>Corynebacterium imitans</i> .156978, <i>Corynebacterium jeikeium</i> , <i>Corynebacterium kutscheri</i> .35755, <i>Corynebacterium maris</i> , <i>Corynebacterium stationis</i> .1705, <i>Corynebacterium uterequi</i> .1072256, <i>Frankia</i> sp. Eul1c.298654, <i>Micrococcus phosphovorus</i> , <i>Mycobacterium bovis</i> , <i>Mycobacterium chubuense</i> , <i>Mycobacterium marinum</i> , <i>Olsenella</i> sp. oral, <i>Propionibacterium propionicum</i> , <i>Pseudonocardia dioxanivorans</i> , <i>Pseudonocardia</i> sp. EC080625-04.1096868, <i>Rhodococcus opacus</i> , <i>Rubrobacter xylanophilus</i> , <i>Streptomyces cattleya</i> , <i>Streptomyces glaucescens</i> .1907, <i>Streptomyces vietnamensis</i> .362257        |
| HIGH7 | <i>Actinomyces radicitus</i> .111015, <i>Adlercreutzia equolifaciens</i> , <i>Amycolaticoccus subflavus</i> , <i>Arthrobacter</i> sp. A3.595593, <i>Bifidobacterium coryneforme</i> .1687, <i>Bifidobacterium pseudolongum</i> , <i>Cellulomonas gilvus</i> , <i>Corynebacteriales bacterium</i> , <i>Corynebacteriales bacterium</i> , <i>Corynebacterium camporealis</i> .161896, <i>Corynebacterium falsenii</i> , <i>Corynebacterium jeikeium</i> , <i>Corynebacterium</i> sp. ATCC, <i>Corynebacterium variabile</i> , <i>Ilumatobacter coccineus</i> , <i>Kocuria rhizophila</i> , <i>Kutzneria alba</i> , <i>Microbacterium testaceum</i> , <i>Mobiluncus curtisii</i> , <i>Mycobacterium africanum</i> .33894, <i>Propionibacterium propionicum</i> , <i>Saccharopolyspora erythraea</i> , <i>Salinispora arenicola</i> , <i>Scardovia inopinata</i> , <i>Segniliparus rotundus</i> , <i>Streptomyces bingchengensis</i>                                             |
| HIGH8 | <i>Actinomyces</i> sp. oral, <i>Adlercreutzia equolifaciens</i> , <i>Amycolatopsis methanolica</i> , <i>Arthrobacter aurescens</i> , <i>Arthrobacter</i> sp. LS16.1690248, <i>Bifidobacterium catenulatum</i> , <i>Bifidobacterium kashiwanohense</i> , <i>Bifidobacterium longum</i> , <i>Bifidobacterium pseudocatenulatum</i> , <i>Cellulomonas gilvus</i> , <i>Devriesea agamarum</i> .472569, <i>Frankia</i> sp. EAN1pec.298653, <i>Gordonia</i> sp. KTR9.337191, <i>Isophtericola variabilis</i> , <i>Microterricola viridarii</i> .412690, <i>Mycobacterium fortuitum</i> .1766, <i>Mycobacterium gilvus</i> , <i>Mycobacterium</i> sp. EPA45.1545728, <i>Nocardia cyriacigeorgica</i> , <i>Propionibacterium freudenreichii</i> , <i>Pseudonocardia</i> sp. HH130629-09.1641402, <i>Rhodoluna laticola</i> .529884,                                                                                                                                                  |

*Streptomyces collinus*, *Streptomyces cyaneogriseus*, *Streptomyces* sp. Mg1.465541, *Streptomyces xiamenensis*.408015

- HIGH9 *Acidimicrobium ferrooxidans*, *Actinomyces oris*.544580, *Amycolatopsis mediterranei*, *Arthrobacter chlorophenolicus*, *Arthrobacter* sp. YC-RL1.1652545, *Bifidobacterium animalis*, *Bifidobacterium pseudolongum*, *Catenulispora acidiphila*, *Clavibacter michiganensis*, *Corynebacterium casei*, *Corynebacterium doosanense*, *Corynebacterium terpenotabidum*, *Frankia alni*, *Gardnerella vaginalis*, *Microbacterium* sp. PAMC, *Mycobacterium fortuitum*.1766, *Mycobacterium goodii*.134601, *Mycobacterium haemophilum*, *Mycobacterium leprae*, *Mycobacterium* sp. MCS.164756, *Olsenella* sp. oral, *Pimelobacter simplex*.2045, *Pseudonocardia* sp. EC080610-09.1688404, *Pseudonocardia* sp. HH130629-09.1641402, *Scardovia inopinata*, *Trueperella pyogenes*
- HIGH10 *Actinobacteria bacterium*, *Actinomyces radidentis*.111015, *Actinosynnema mirum*, *Arcanobacterium haemolyticum*, *Arthrobacter* sp. FB24.290399, *Beutenbergia cavernae*, *Bifidobacterium bifidum*.1681, *Coriobacteriaceae bacterium*, *Corynebacteriales bacterium*, *Corynebacterium camporealensis*.161896, *Corynebacterium marinum*, *Corynebacterium variabile*, *Ilumatobacter coccineus*, *Micromonospora* sp. L5.648999, *Mycobacterium indicus*, *Mycobacterium marinum*, *Mycobacterium vanbaalenii*, *Olsenella* sp. oral, *Renibacterium salmoninarum*, *Saccharothrix espanaensis*, *Sanguibacter keddiei*, *Streptomyces albus*.1888, *Streptomyces cyaneogriseus*, *Streptomyces pristinaespiralis*.38300, *Streptomyces violaceusniger*, *Xylanimonas cellulosilytica*
- HIGH11 *Actinomyces radidentis*.111015, *Actinoplanes friulensis*, *Actinoplanes missouriensis*, *Actinoplanes* sp. N902-109.649831, *Arthrobacter arilaitensis*.256701, *Arthrobacter phenanthrenivorans*, *Bifidobacterium coryneforme*.1687, *Catenulispora acidiphila*, *Corynebacterium diphtheriae*, *Kineococcus radiotolerans*, *Kytococcus sedentarius*, *Microbacterium* sp. No., *Microbacterium* sp. XT11.367477, *Micrococcus luteus*, *Micromonospora* sp. L5.648999, *Mycobacterium* sp. EPA45.1545728, *Mycobacterium* sp. JLS.164757, *Mycobacterium* sp. VKM, *Segniliparus rotundus*, *Slackia heliotrinireducens*, *Streptomyces cattleya*, *Streptomyces collinus*, *Streptomyces scabiei*, *Streptomyces* sp. 4F.1751294, *Streptomyces* sp. PAMC26508.1265601, *Tropheryma whipplei*
- HIGH12 *Arthrobacter alpinus*.656366, *Arthrobacter chlorophenolicus*, *Arthrobacter* sp. A3.595593, *Beutenbergia cavernae*, *Bifidobacterium dentium*, *Corynebacterium marinum*, *Corynebacterium pseudotuberculosis*.1719, *Corynebacterium stationis*.1705, *Cryptobacterium curtum*, *Isoptericola variabilis*, *Jonesia denitrificans*, *Kineococcus radiotolerans*, *Luteipulveratus mongoliensis*.571913, *Microbacterium* sp. No., *Mycobacterium chubuense*, *Mycobacterium fortuitum*.1766, *Mycobacterium sinense*.875328, *Mycobacterium* sp. EPA45.1545728, *Mycobacterium vanbaalenii*, *Olsenella uli*, *Rhodococcus* sp. B7740.1564114, *Rothia mucilaginosa*, *Rubrobacter xylanophilus*, *Sanguibacter keddiei*, *Stackebrandtia nassauensis*, *Streptomyces avermitilis*
- HIGH13 *Actinomyces oris*.544580, *Arthrobacter* sp. ATCC, *Arthrobacter* sp. Hiyo8.1588023, *Arthrobacter sulfonivorans*.121292, *Atopobium parvulum*, *Bifidobacterium coryneforme*.1687, *Cellulomonas flavigena*, *Clavibacter michiganensis*, *Corynebacterium epidermidicantis*.1050174, *Corynebacterium ulcerans*, *Corynebacterium variabile*, *Gordonia* sp. KTR9.337191, *Ilumatobacter coccineus*, *Kibdelosporangium phytohabitans*.860235, *Kribbella flavida*, *Microbacterium* sp. No., *Mycobacterium* sp. EPA45.1545728, *Mycobacterium* sp. MOTT36Y.1168287, *Mycobacterium yongonense*, *Nocardia nova*, *Saccharomonospora viridis*, *Saccharothrix espanaensis*, *Streptomyces pratensis*, *Streptomyces pristinaespiralis*.38300, *Streptomyces* sp. 769.1262452, *Thermobispora bispora*
- HIGH14 *Acidimicrobium ferrooxidans*, *Actinobacteria bacterium*, *Actinomyces meyeri*.52773, *Actinosynnema mirum*, *Adlercreutzia equolifaciens*, *Amycolatopsis methanolica*, *Amycolatopsis orientalis*, *Arcanobacterium haemolyticum*, *Arthrobacter arilaitensis*.256701, *Arthrobacter* sp. ERGS1, *Atopobium parvulum*, *Brachybacterium faecium*, *Corynebacterium urealyticum*, *Cryptobacterium curtum*, *Eggerthella* sp. YY7918.502558, *Frankia* sp. EAN1pec.298653, *Mycobacterium africanum*.33894, *Mycobacterium gilvum*, *Mycobacterium yongonense*, *Nocardioopsis dassonvillei*, *Propionibacterium acidipropionici*, *Rothia mucilaginosa*, *Salinispora tropica*, *Streptomyces reticuli*.1926, *Streptomyces* sp. CdTB01.1725411, *Tsukamurella paurometabola*
- HIGH15 *Actinobacteria bacterium*, *Actinoplanes missouriensis*, *Actinosynnema mirum*, *Amycolatopsis mediterranei*, *Arthrobacter alpinus*.656366, *Arthrobacter chlorophenolicus*, *Arthrobacter* sp. ATCC, *Catenulispora acidiphila*, *Corynebacterium glutamicum*, *Corynebacterium ulcerans*, *Eggerthella* sp. YY7918.502558, *Gordonia bronchialis*, *Kocuria flava*.446860, *Microbacterium testaceum*, *Mycobacterium rhodesiae*, *Mycobacterium* sp. MCS.164756, *Nocardia farcinica*.37329, *Olsenella* sp. oral, *Pseudonocardia* sp. EC080625-04.1096868, *Rhodococcus jostii*, *Salinispora arenicola*, *Salinispora tropica*, *Streptomyces ambofaciens*, *Streptomyces glaucescens*.1907, *Tropheryma whipplei*, *Verrucosipora maris*
- HIGH16 *Brevibacterium*, *Actinoplanes* sp. N902-109.649831, *Adlercreutzia equolifaciens*, *Amycolatopsis japonica*.208439, *Bifidobacterium actinocoloniiforme*, *Bifidobacterium breve*.1685, *Clavibacter michiganensis*, *Coriobacterium glomerans*, *Corynebacterium casei*, *Corynebacterium deserti*, *Corynebacterium glyciniphilum*, *Corynebacterium maris*, *Corynebacterium stationis*.1705, *Corynebacterium ulcerans*, *Kitasatospora setae*, *Luteipulveratus mongoliensis*.571913, *Mycobacterium gilvum*, *Mycobacterium goodii*.134601, *Mycobacterium liflandii*, *Mycobacterium ulcerans*, *Rothia dentocariosa*, *Salinispora arenicola*, *Streptomyces glaucescens*.1907, *Streptomyces lydicus*, *Streptomyces* sp. CNQ-509.444103, *Streptomyces xiamenensis*.408015

- HIGH1  
7 Amycolatopsis methanolica, Bifidobacterium bifidum.1681, Cellulomonas gilvus, Coriobacteriaceae bacterium, Corynebacterium aurimucosum, Corynebacterium efficiens, Corynebacterium epidermidicanis.1050174, Corynebacterium kutscheri.35755, Corynebacterium stationis.1705, Gardnerella vaginalis, Kineococcus radiotolerans, Leifsonia xyli, Mycobacterium sp. KMS.189918, Mycobacterium sp. VKM, Nakamurella multipartita, Nocardia nova, Nocardioopsis dassonvillei, Olsenella uli, Propionibacterium freudenreichii, Saccharomonospora viridis, Streptomyces cyaneogriseus, Streptomyces hygroscopicus, Streptomyces sp. CNQ-509.444103, Streptomyces sp. Mg1.465541, Streptomyces vietnamensis.362257, Verrucosipora maris
- HIGH1  
8 Actinoplanes missouriensis, Amycolatopsis orientalis, Arthrobacter sp. A3.595593, Arthrobacter sp. ATCC, Bifidobacterium animalis, Bifidobacterium indicum, Corynebacterium callunae, Corynebacterium humireducens, Corynebacterium ulcerans, Corynebacterium vitaeruminis, Frankia alni, Ilumatobacter coccineus, Mycobacterium bovis, Mycobacterium goodii.134601, Mycobacterium leprae, Propionibacterium acnes, Propionibacterium avidum, Pseudonocardia sp. EC080619-01.1096856, Rothia mucilaginosa, Saccharopolyspora erythraea, Salinispora tropica, Streptomyces sp. 4F.1751294, Streptomyces sp. CdTB01.1725411, Streptomyces sp. SirexAA-E.862751, Streptomyces violaceusniger, Streptosporangium roseum
- HIGH1  
9 Actinoplanes missouriensis, Arthrobacter arilaitensis.256701, Bifidobacterium breve.1685, Brachybacterium faecium, Corynebacteriales bacterium, Corynebacterium glutamicum, Corynebacterium stationis.1705, Corynebacterium urealyticum, Frankia alni, Frankia sp. Eul1c.298654, Geodermatophilus obscurus, Kocuria flava.446860, Microbacterium testaceum, Mycobacterium haemophilum, Mycobacterium sp. JLS.164757, Mycobacterium sp. MOTT36Y.1168287, Nocardia brasiliensis, Nocardia farcinica.37329, Nocardia nova, Olsenella sp. oral, Renibacterium salmoninarum, Rubrobacter radiotolerans.42256, Stackebrandtia nassauensis, Streptomyces sp. CNQ-509.444103, Streptomyces sp. PAMC26508.1265601, Xylanimonas cellulosilytica
- HIGH2  
0 Actinomyces meyeri.52773, Actinomyces oris.544580, Adlercreutzia equolifaciens, Amycolatopsis methanolica, Arcanobacterium haemolyticum, Beutenbergia cavernae, Clavibacter michiganensis, Corynebacterium atypicum.191610, Corynebacterium camporealensis.161896, Corynebacterium singulare.161899, Frankia sp. Eul1c.298654, Frankia symbiont, Leifsonia xyli, Luteipulveratus mongoliensis.571913, Microbacterium sp. No., Mycobacterium leprae, Propionibacterium freudenreichii, Pseudonocardia dioxanivorans, Saccharomonospora viridis, Streptomyces collinus, Streptomyces glaucescens.1907, Streptomyces griseus, Streptomyces pratensis, Streptomyces reticuli.1926, Streptomyces sp. CdTB01.1725411, Tsukamurella paurometabola

2

3 **Table S20** List of 6 Deinococcus-Thermus (DT) species kept for 20 permutations under MID6 random sampling scenarios (RSS).

| RSS | species kept                                                                                                                                                                                                                              |
|-----|-------------------------------------------------------------------------------------------------------------------------------------------------------------------------------------------------------------------------------------------|
| 0   | Thermus_aquaticus_Y51MC23.498848,Deinococcus_radiodurans_R1.243230,Thermus_scotoductus_SA-01.743525,Truepera_radiovictrix_DSM_17093.649638,Deinococcus_actinosclerus.1768108,Thermus_sp._CCB_US3_UF1.1111069                              |
| 1   | Thermus_aquaticus_Y51MC23.498848,Deinococcus_actinosclerus.1768108,Deinococcus_peraridilitoris_DSM_19664.937777,Thermus_oshimai_JL-2.751945,Deinococcus_swuensis.1182571,Deinococcus_maricopensis_DSM_21211.709986                        |
| 2   | Thermus_scotoductus_SA-01.743525,Oceanithermus_profundus_DSM_14977.670487,Deinococcus_actinosclerus.1768108,Deinococcus_deserti_VCD115.546414,Deinococcus_swuensis.1182571,Thermus_oshimai_JL-2.751945                                    |
| 3   | Oceanithermus_profundus_DSM_14977.670487,Deinococcus_peraridilitoris_DSM_19664.937777,Meiothermus_silvanus_DSM_9946.526227,Deinococcus_soli_Cha_et_al._2014.1309411,Thermus_parvatiensis.456163,Deinococcus_maricopensis_DSM_21211.709986 |
| 4   | Deinococcus_maricopensis_DSM_21211.709986,Truepera_radiovictrix_DSM_17093.649638,Meiothermus_silvanus_DSM_9946.526227,Thermus_scotoductus_SA-01.743525,Deinococcus_radiodurans_R1.243230,Deinococcus_geothermalidis_DSM_11300.319795      |
| 5   | Thermus_oshimai_JL-2.751945,Deinococcus_soli_Cha_et_al._2014.1309411,Deinococcus_proteolyticus_MRP.693977,Marinithermus_hydrothermalis_DSM_14884.869210,Deinococcus_radiodurans_R1.243230,Thermus_scotoductus_SA-01.743525                |
| 6   | Deinococcus_peraridilitoris_DSM_19664.937777,Deinococcus_actinosclerus.1768108,Thermus_thermophilus_JL-18.798128,Deinococcus_deserti_VCD115.546414,Truepera_radiovictrix_DSM_17093.649638,Meiothermus_silvanus_DSM_9946.526227            |

- 7 Oceanithermus\_profundus\_DSM\_14977.670487,Deinococcus\_swuensis.1182571,Thermus\_thermophilus\_JL-18.798128,Deinococcus\_deserti\_VCD115.546414,Deinococcus\_maricopensis\_DSM\_21211.709986,Deinococcus\_gobien-  
nsis\_I-0.745776
- 8 Thermus\_parvatiensis.456163,Oceanithermus\_profundus\_DSM\_14977.670487,Marinithermus\_hydrothermalis\_DSM\_14884.869210,Deinococcus\_proteolyticus\_MRP.693977,Thermus\_thermophilus\_JL-18.798128,Thermus\_sp.\_CCB\_US3\_UF1.1111069
- 9 Thermus\_aquaticus\_Y51MC23.498848,Deinococcus\_gobiensis\_I-0.745776,Truepera\_radiovictrix\_DSM\_17093.649638,Deinococcus\_radiodurans\_R1.243230,Deinococcus\_proteolyticus\_MRP.693977,Thermus\_scotoductus\_SA-01.743525
- 10 Truepera\_radiovictrix\_DSM\_17093.649638,Meiothermus\_silvanus\_DSM\_9946.526227,Thermus\_parvatiensis.456163,Deinococcus\_radiodurans\_R1.243230,Deinococcus\_proteolyticus\_MRP.693977,Marinithermus\_hydrothermalis\_DSM\_14884.869210
- 11 Thermus\_sp.\_CCB\_US3\_UF1.1111069,Thermus\_scotoductus\_SA-01.743525,Deinococcus\_proteolyticus\_MRP.693977,Deinococcus\_swuensis.1182571,Oceanithermus\_profundus\_DSM\_14977.670487,Deinococcus\_geothermalis\_DSM\_11300.319795
- 12 Truepera\_radiovictrix\_DSM\_17093.649638,Deinococcus\_gobiensis\_I-0.745776,Thermus\_oshimai\_JL-2.751945,Deinococcus\_proteolyticus\_MRP.693977,Deinococcus\_maricopensis\_DSM\_21211.709986,Deinococcus\_radiodurans\_R1.243230
- 13 Marinithermus\_hydrothermalis\_DSM\_14884.869210,Thermus\_thermophilus\_JL-18.798128,Thermus\_sp.\_CCB\_US3\_UF1.1111069,Deinococcus\_radiodurans\_R1.243230,Thermus\_oshimai\_JL-2.751945,Deinococcus\_gobiensis\_I-0.745776
- 14 Deinococcus\_deserti\_VCD115.546414,Thermus\_oshimai\_JL-2.751945,Deinococcus\_proteolyticus\_MRP.693977,Thermus\_thermophilus\_JL-18.798128,Deinococcus\_actinosclerus.1768108,Thermus\_aquaticus\_Y51MC23.498848
- 15 Marinithermus\_hydrothermalis\_DSM\_14884.869210,Deinococcus\_proteolyticus\_MRP.693977,Deinococcus\_deserti\_VCD115.546414,Deinococcus\_radiodurans\_R1.243230,Deinococcus\_actinosclerus.1768108,Deinococcus\_geothermalis\_DSM\_11300.319795
- 16 Deinococcus\_peraridilitoris\_DSM\_19664.937777,Thermus\_scotoductus\_SA-01.743525,Marinithermus\_hydrothermalis\_DSM\_14884.869210,Thermus\_parvatiensis.456163,Truepera\_radiovictrix\_DSM\_17093.649638,Deinococcus\_actinosclerus.1768108
- 17 Deinococcus\_swuensis.1182571,Deinococcus\_gobiensis\_I-0.745776,Thermus\_scotoductus\_SA-01.743525,Thermus\_parvatiensis.456163,Deinococcus\_deserti\_VCD115.546414,Deinococcus\_maricopensis\_DSM\_21211.709986
- 18 Thermus\_oshimai\_JL-2.751945,Deinococcus\_maricopensis\_DSM\_21211.709986,Truepera\_radiovictrix\_DSM\_17093.649638,Deinococcus\_radiodurans\_R1.243230,Thermus\_aquaticus\_Y51MC23.498848,Oceanithermus\_profundus\_DSM\_14977.670487
- 19 Truepera\_radiovictrix\_DSM\_17093.649638,Marinithermus\_hydrothermalis\_DSM\_14884.869210,Thermus\_scotoductus\_SA-01.743525,Deinococcus\_proteolyticus\_MRP.693977,Thermus\_oshimai\_JL-2.751945,Thermus\_thermophilus\_JL-18.798128

4

5

6 **Table S21** List of 10 *Deinococcus*-*Thermus* (DT) species kept for 20 permutations under MID10 random sampling scenarios (RSS).

| RSS | species kept                                                                                                                                                                                                                                                                                                                                                                                                                                                                           |
|-----|----------------------------------------------------------------------------------------------------------------------------------------------------------------------------------------------------------------------------------------------------------------------------------------------------------------------------------------------------------------------------------------------------------------------------------------------------------------------------------------|
| 0   | <i>Thermus_scotoductus_SA</i> -01.743525, <i>Thermus_parvatiensis</i> .456163, <i>Thermus_sp._CCB_US3_UF1</i> .1111069, <i>Deinococcus_maricopensis_DSM_21211</i> .709986, <i>Deinococcus_actinosclerus</i> .1768108, <i>Deinococcus_gobiensis_I</i> -0.745776, <i>Deinococcus_peraridilitoris_DSM_19664</i> .937777, <i>Deinococcus_deserti_VCD115</i> .546414, <i>Thermus_thermophilus_JL</i> -18.798128, <i>Marinithermus_hydrothermalis_DSM_14884</i> .869210                      |
| 1   | <i>Deinococcus_gobiensis_I</i> -0.745776, <i>Meiothermus_silvanus_DSM_9946</i> .526227, <i>Deinococcus_soli_Cha_et_al.</i> .2014.1309411, <i>Deinococcus_peraridilitoris_DSM_19664</i> .937777, <i>Deinococcus_deserti_VCD115</i> .546414, <i>Thermus_sp._CCB_US3_UF1</i> .1111069, <i>Oceanithermus_profundus_DSM_14977</i> .670487, <i>Thermus_scotoductus_SA</i> -01.743525, <i>Marinithermus_hydrothermalis_DSM_14884</i> .869210, <i>Thermus_thermophilus_JL</i> -18.798128       |
| 2   | <i>Truepera_radiovictrix_DSM_17093</i> .649638, <i>Oceanithermus_profundus_DSM_14977</i> .670487, <i>Deinococcus_maricopensis_DSM_21211</i> .709986, <i>Thermus_sp._CCB_US3_UF1</i> .1111069, <i>Deinococcus_geothermalis_DSM_11300</i> .319795, <i>Marinithermus_hydrothermalis_DSM_14884</i> .869210, <i>Thermus_thermophilus_JL</i> -18.798128, <i>Deinococcus_gobiensis_I</i> -0.745776, <i>Deinococcus_peraridilitoris_DSM_19664</i> .937777, <i>Thermus_oshimai_JL</i> -2.751945 |
| 3   | <i>Thermus_parvatiensis</i> .456163, <i>Deinococcus_swuensis</i> .1182571, <i>Meiothermus_silvanus_DSM_9946</i> .526227, <i>Deinococcus_maricopensis_DSM_21211</i> .709986, <i>Thermus_sp._CCB_US3_UF1</i> .1111069, <i>Deinococcus_gobiensis_I</i> -0.745776, <i>Deinococcus_peraridilitoris_DSM_19664</i> .937777, <i>Thermus_oshimai_JL</i> -2.751945, <i>Truepera_radiovictrix_DSM_17093</i> .649638, <i>Deinococcus_radiodurans_R1</i> .243230                                    |
| 4   | <i>Deinococcus_swuensis</i> .1182571, <i>Deinococcus_radiodurans_R1</i> .243230, <i>Deinococcus_actinosclerus</i> .1768108, <i>Thermus_aquaticus_Y51MC23</i> .498848, <i>Deinococcus_soli_Cha_et_al.</i> .2014.1309411, <i>Oceanithermus_profundus_DSM_14977</i> .670487, <i>Deinococcus_geothermalis_DSM_11300</i> .319795, <i>Thermus_oshimai_JL</i> -2.751945, <i>Deinococcus_proteolyticus_MRP</i> .693977, <i>Deinococcus_maricopensis_DSM_21211</i> .709986                      |
| 5   | <i>Meiothermus_silvanus_DSM_9946</i> .526227, <i>Oceanithermus_profundus_DSM_14977</i> .670487, <i>Deinococcus_actinosclerus</i> .1768108, <i>Thermus_scotoductus_SA</i> -01.743525, <i>Deinococcus_peraridilitoris_DSM_19664</i> .937777, <i>Deinococcus_deserti_VCD115</i> .546414, <i>Thermus_aquaticus_Y51MC23</i> .498848, <i>Thermus_oshimai_JL</i> -2.751945, <i>Deinococcus_proteolyticus_MRP</i> .693977, <i>Deinococcus_geothermalis_DSM_11300</i> .319795                   |
| 6   | <i>Deinococcus_deserti_VCD115</i> .546414, <i>Truepera_radiovictrix_DSM_17093</i> .649638, <i>Deinococcus_maricopensis_DSM_21211</i> .709986, <i>Thermus_parvatiensis</i> .456163, <i>Deinococcus_radiodurans_R1</i> .243230, <i>Deinococcus_geothermalis_DSM_11300</i> .319795, <i>Deinococcus_peraridilitoris_DSM_19664</i> .937777, <i>Thermus_thermophilus_JL</i> -18.798128, <i>Thermus_oshimai_JL</i> -2.751945, <i>Deinococcus_soli_Cha_et_al.</i> .2014.1309411                |
| 7   | <i>Deinococcus_radiodurans_R1</i> .243230, <i>Marinithermus_hydrothermalis_DSM_14884</i> .869210, <i>Thermus_thermophilus_JL</i> -18.798128, <i>Truepera_radiovictrix_DSM_17093</i> .649638, <i>Deinococcus_proteolyticus_MRP</i> .693977, <i>Deinococcus_deserti_VCD115</i> .546414, <i>Deinococcus_geothermalis_DSM_11300</i> .319795, <i>Deinococcus_actinosclerus</i> .1768108, <i>Deinococcus_gobiensis_I</i> -0.745776, <i>Thermus_scotoductus_SA</i> -01.743525                 |
| 8   | <i>Deinococcus_proteolyticus_MRP</i> .693977, <i>Thermus_oshimai_JL</i> -2.751945, <i>Deinococcus_soli_Cha_et_al.</i> .2014.1309411, <i>Marinithermus_hydrothermalis_DSM_14884</i> .869210, <i>Deinococcus_gobiensis_I</i> -0.745776, <i>Deinococcus_deserti_VCD115</i> .546414, <i>Thermus_sp._CCB_US3_UF1</i> .1111069, <i>Truepera_radiovictrix_DSM_17093</i> .649638, <i>Deinococcus_peraridilitoris_DSM_19664</i> .937777, <i>Deinococcus_swuensis</i> .1182571                   |
| 9   | <i>Thermus_oshimai_JL</i> -2.751945, <i>Thermus_aquaticus_Y51MC23</i> .498848, <i>Thermus_sp._CCB_US3_UF1</i> .1111069, <i>Thermus_thermophilus_JL</i> -18.798128, <i>Deinococcus_soli_Cha_et_al.</i> .2014.1309411, <i>Deinococcus_actinosclerus</i> .1768108, <i>Meiothermus_silvanus_DSM_9946</i> .526227, <i>Oceanithermus_profundus_DSM_14977</i> .670487, <i>Deinococcus_gobiensis_I</i> -0.745776, <i>Deinococcus_swuensis</i> .1182571                                         |
| 10  | <i>Thermus_aquaticus_Y51MC23</i> .498848, <i>Thermus_oshimai_JL</i> -2.751945, <i>Deinococcus_swuensis</i> .1182571, <i>Deinococcus_actinosclerus</i> .1768108, <i>Deinococcus_peraridilitoris_DSM_19664</i> .937777, <i>Thermus_parvatiensis</i> .456163, <i>Deinococcus_maricopensis_DSM_21211</i> .709986, <i>Deinococcus_soli_Cha_et_al.</i> .2014.1309411, <i>Deinococcus_gobiensis_I</i> -0.745776, <i>Deinococcus_geothermalis_DSM_11300</i> .319795                            |
| 11  | <i>Marinithermus_hydrothermalis_DSM_14884</i> .869210, <i>Deinococcus_deserti_VCD115</i> .546414, <i>Thermus_sp._CCB_US3_UF1</i> .1111069, <i>Deinococcus_maricopensis_DSM_21211</i> .709986, <i>Deinococcus_gobiensis_I</i> -0.745776, <i>Thermus_oshimai_JL</i> -                                                                                                                                                                                                                    |



2.751945, *Thermus*\_parvatiensis.456163, *Deinococcus*\_geothermalis\_DSM\_11300.319795, *Oceanithermus*\_profundus\_DSM\_14977.670487, *Deinococcus*\_proteolyticus\_MRP.693977

- 12 *Deinococcus*\_maricopenis\_DSM\_21211.709986, *Deinococcus*\_swuensis.1182571, *Truepera*\_radiovictrix\_DSM\_17093.649638, *Marinithermus*\_hydrothermalis\_DSM\_14884.869210, *Thermus*\_scotoductus\_SA-01.743525, *Deinococcus*\_gobiensis\_I-0.745776, *Deinococcus*\_actinosclerus.1768108, *Thermus*\_parvatiensis.456163, *Thermus*\_thermophilus\_JL-18.798128, *Thermus*\_sp.\_CCB\_US3\_UF1.1111069
- 13 *Deinococcus*\_swuensis.1182571, *Deinococcus*\_geothermalis\_DSM\_11300.319795, *Deinococcus*\_soli\_\_Cha\_et\_al.\_2014.1309411, *Thermus*\_sp.\_CCB\_US3\_UF1.1111069, *Marinithermus*\_hydrothermalis\_DSM\_14884.869210, *Deinococcus*\_proteolyticus\_MRP.693977, *Thermus*\_scotoductus\_SA-01.743525, *Truepera*\_radiovictrix\_DSM\_17093.649638, *Deinococcus*\_maricopenis\_DSM\_21211.709986, *Deinococcus*\_actinosclerus.1768108
- 14 *Deinococcus*\_deserti\_VCD115.546414, *Meiothermus*\_silvanus\_DSM\_9946.526227, *Thermus*\_scotoductus\_SA-01.743525, *Marinithermus*\_hydrothermalis\_DSM\_14884.869210, *Deinococcus*\_peraridilitoris\_DSM\_19664.937777, *Oceanithermus*\_profundus\_DSM\_14977.670487, *Deinococcus*\_gobiensis\_I-0.745776, *Deinococcus*\_swuensis.1182571, *Truepera*\_radiovictrix\_DSM\_17093.649638, *Thermus*\_sp.\_CCB\_US3\_UF1.1111069
- 15 *Marinithermus*\_hydrothermalis\_DSM\_14884.869210, *Deinococcus*\_proteolyticus\_MRP.693977, *Thermus*\_scotoductus\_SA-01.743525, *Deinococcus*\_gobiensis\_I-0.745776, *Thermus*\_parvatiensis.456163, *Oceanithermus*\_profundus\_DSM\_14977.670487, *Thermus*\_thermophilus\_JL-18.798128, *Thermus*\_oshimai\_JL-2.751945, *Deinococcus*\_soli\_\_Cha\_et\_al.\_2014.1309411, *Thermus*\_aquaticus\_Y51MC23.498848
- 16 *Oceanithermus*\_profundus\_DSM\_14977.670487, *Thermus*\_scotoductus\_SA-01.743525, *Deinococcus*\_soli\_\_Cha\_et\_al.\_2014.1309411, *Deinococcus*\_maricopenis\_DSM\_21211.709986, *Deinococcus*\_geothermalis\_DSM\_11300.319795, *Truepera*\_radiovictrix\_DSM\_17093.649638, *Deinococcus*\_actinosclerus.1768108, *Deinococcus*\_gobiensis\_I-0.745776, *Thermus*\_aquaticus\_Y51MC23.498848, *Thermus*\_thermophilus\_JL-18.798128
- 17 *Meiothermus*\_silvanus\_DSM\_9946.526227, *Thermus*\_sp.\_CCB\_US3\_UF1.1111069, *Deinococcus*\_gobiensis\_I-0.745776, *Deinococcus*\_geothermalis\_DSM\_11300.319795, *Thermus*\_parvatiensis.456163, *Oceanithermus*\_profundus\_DSM\_14977.670487, *Thermus*\_aquaticus\_Y51MC23.498848, *Deinococcus*\_actinosclerus.1768108, *Thermus*\_oshimai\_JL-2.751945, *Deinococcus*\_deserti\_VCD115.546414
- 18 *Thermus*\_sp.\_CCB\_US3\_UF1.1111069, *Marinithermus*\_hydrothermalis\_DSM\_14884.869210, *Deinococcus*\_radiodurans\_R1.243230, *Thermus*\_oshimai\_JL-2.751945, *Meiothermus*\_silvanus\_DSM\_9946.526227, *Oceanithermus*\_profundus\_DSM\_14977.670487, *Thermus*\_scotoductus\_SA-01.743525, *Thermus*\_parvatiensis.456163, *Deinococcus*\_peraridilitoris\_DSM\_19664.937777, *Deinococcus*\_deserti\_VCD115.546414
- 19 *Deinococcus*\_radiodurans\_R1.243230, *Thermus*\_aquaticus\_Y51MC23.498848, *Truepera*\_radiovictrix\_DSM\_17093.649638, *Thermus*\_sp.\_CCB\_US3\_UF1.1111069, *Deinococcus*\_gobiensis\_I-0.745776, *Thermus*\_thermophilus\_JL-18.798128, *Oceanithermus*\_profundus\_DSM\_14977.670487, *Deinococcus*\_proteolyticus\_MRP.693977, *Thermus*\_parvatiensis.456163, *Deinococcus*\_swuensis.1182571

9 **Table S22** List of 10 Actinobacteria (ACT) species kept for 20 permutations under MID10 random sampling scenarios (RSS).

RSS species kept

- 0 Streptomyces\_globisporus\_C-1027.1172567,Rhodoluna\_lacicola.529884,Arthrobacter\_sp.\_PAMC25486.1494608,Corynebacterium\_ulcerans\_FRC58.1408268,Tsukamurella\_paurometabola\_DSM\_20162.521096,Arthrobacter\_phenanthrenivorans\_Sphe3.930171,Kocuria\_rhizophila\_DC2201.378753,Thermobifida\_fusca\_YX.269800,Frankia\_sp.\_Eu11c.298654,Corynebacterium\_aurimucosum\_ATCC\_700975.548476
- 1 Verrucosipora\_maris\_AB-18-032.263358,Salinispora\_tropica\_CNB-440.369723,Salinispora\_arenicola\_CNS-205.391037,Geodermatophilus\_obscurus\_DSM\_43160.526225,Streptomyces\_vietnamensis.362257,Arthrobacter\_sp.\_Y C-RL1.1652545,Corynebacterium\_stationis.1705,Actinomyces\_meyeri.52773,Ilumatobacter\_coccineus\_YM16-304.1313172,Corynebacterium\_terpenotabidum\_Y-11.1200352
- 2 Arthrobacter\_aurescens\_TC1.290340,Corynebacterium\_glyciniphilum\_AJ\_3170.1404245,Streptomyces\_lydicus\_A02.14 03539,Pseudonocardia\_dioxanivorans\_CB1190.675635,Streptomyces\_scabiei\_87.22.680198,Corynebacterium\_singular e.161899,Corynebacterium\_urealyticum\_DSM\_7109.504474,Streptomyces\_collinus\_Tu\_365.1214242,Corynebacterium \_lactis\_RW2-5.1408189,Streptomyces\_xiamenensis.408015
- 3 Adlercreutzia\_equilifaciens\_DSM\_19450.1384484,Corynebacterium\_atypicum.191610,Mycobacterium\_yongonense\_05-1390.1138871,Bifidobacterium\_bifidum.1681,Cellulomonas\_flavigena\_DSM\_20109.446466,Rhodococcus\_jostii\_RHA1.1 01510,Corynebacterium\_kutscheri.35755,Microbacterium\_sp.\_XT11.367477,Microbacterium\_sp.\_PAMC\_28756.179505 3,Mycobacterium\_intracellulare\_MOTT-64.1138383
- 4 Corynebacterium\_aurimucosum\_ATCC\_700975.548476,Streptomyces\_glaucescens.1907,Segniliparus\_rotundus\_DSM\_44985.640132,Bifidobacterium\_pseudolongum\_PV8-2.1447715,Actinoplanes\_sp.\_SE50\_110.134676,Corynebacterium\_argentoratense\_DSM\_44202.1348662,Corynebacteri um\_pseudotuberculosis.1719,Mycobacterium\_africanum.33894,Rhodococcus\_erythropolis\_PR4.234621,Corynebacteri um\_camporealensis.161896
- 5 Mycobacterium\_marinum\_M.216594,Amycolicococcus\_subflavus\_DQS3-9A1.443218,Atopobium\_parvulum\_DSM\_20469.521095,Pseudonocardia\_sp.\_HH130629-09.1641402,Microbacterium\_sp.\_PAMC\_28756.1795053,Mycobacterium\_sp.\_VKM\_Ac-1817D.1273687,Mycobacterium\_haemophilum\_DSM\_44634.1202450,Corynebacterium\_humireducens\_NBRC\_106098\_ \_DSM\_45392.1223515,Corynebacterium\_maris\_DSM\_45190.1224163,Streptomyces\_reticuli.1926
- 6 Corynebacterium\_falsenii\_DSM\_44353.1451189,Frankia\_sp.\_Eu11c.298654,Rhodococcus\_erythropolis\_PR4.234621,Str eptomyces\_avermitilis\_MA-4680\_ \_NBRC\_14893.227882,Actinomyces\_meyeri.52773,Nocardiopsis\_alba\_ATCC\_BAA-2165.1205910,Mycobacterium\_africanum.33894,Geodermatophilus\_obscurus\_DSM\_43160.526225,Streptomyces\_sp.\_7 69.1262452,Amycolatopsis\_lurida\_NRRL\_2430.1460371
- 7 Streptomyces\_ambofaciens\_ATCC\_23877.278992,Mycobacterium\_haemophilum\_DSM\_44634.1202450,Coriobacteriac eae\_bacterium\_68-1-3.1531429,Corynebacterium\_uterequi.1072256,Thermobispora\_bispora\_DSM\_43833.469371,Rhodococcus\_erythropolis \_PR4.234621,Mycobacterium\_goodii.134601,Frankia\_sp.\_Eu11c.298654,Mycobacterium\_chubuense\_NBB4.710421,Sla ckia\_heliotrinireducens\_DSM\_20476.471855
- 8 Corynebacterium\_camporealensis.161896,Streptomyces\_pratensis\_ATCC\_33331.591167,Streptomyces\_venezuelae.54 571,Corynebacterium\_maris\_DSM\_45190.1224163,Bifidobacterium\_breve.1685,Bifidobacterium\_kashiwanohense\_JCM \_15439\_ \_DSM\_21854.1150460,Corynebacterium\_urealyticum\_DSM\_7109.504474,Corynebacterium\_efficiens\_YS-314.196164,Thermobispora\_bispora\_DSM\_43833.469371,Mycobacterium\_sp.\_MOTT36Y.1168287

- 9 Arthrobacter\_sulfonivorans.121292,Mycobacterium\_fortuitum.1766,Kocuria\_rhizophila\_DC2201.378753,Propionibacterium\_avidum\_44067.1170318,Micromonospora\_aurantiaca\_ATCC\_27029.644283,Pseudonocardia\_sp.\_AL041005-10.445576,Arthrobacter\_sp.\_ATCC\_21022.1771959,Streptosporangium\_roseum\_DSM\_43021.479432,Mycobacterium\_rhodesiae\_NBB3.710685,Bifidobacterium\_breve.1685
- 10 Mycobacterium\_sp.\_JLS.164757,Clavibacter\_michiganensis\_subsp.\_sepedonicus.31964,Amycolatopsis\_japonica.208439,Kineococcus\_radiotolerans\_SRS30216\_\_\_\_ATCC\_BAA-149.266940,Actinomyces\_meyeri.52773,Atopobium\_parvulum\_DSM\_20469.521095,Mycobacterium\_kansasii\_ATCC\_12478.557599,Arthrobacter\_sp.\_Hiyo8.1588023,Streptomyces\_sp.\_4F.1751294,Streptomyces\_pristinaespiralis.38300
- 11 Amycolatopsis\_lurida\_NRRL\_2430.1460371,Streptomyces\_sp.\_Mg1.465541,Rothia\_mucilaginoso\_DY-18.680646,Rathayibacter\_toxicus.145458,Mycobacterium\_sp.\_KMS.189918,Streptomyces\_cattlea\_NRRL\_8057\_\_\_\_DSM\_46488.1003195,Devriesea\_agamarum.472569,Bifidobacterium\_pseudocatenulatum\_DSM\_20438\_\_\_\_JCM\_1200\_\_\_\_LMG\_10505.547043,Trueperella\_pyogenes\_TP8.1435056,Corynebacterium\_kroppenstedtii\_DSM\_44385.645127
- 12 Corynebacteriales\_bacterium\_X1036.1528099,Trueperella\_pyogenes\_TP8.1435056,Mycobacterium\_sp.\_JLS.164757,Mycobacterium\_bovis\_BCG.33892,Bifidobacterium\_breve.1685,Corynebacterium\_glutamicum\_R.340322,Coriobacteriaceae\_bacterium\_68-1-3.1531429,Micromonospora\_sp.\_L5.648999,Corynebacterium\_maris\_DSM\_45190.1224163,Arcanobacterium\_haemolyticum\_DSM\_20595.644284
- 13 Corynebacterium\_glutamicum\_R.340322,Microbacterium\_sp.\_XT11.367477,Aeromicrobium\_erythreum.2041,Mycobacterium\_tuberculosis.1773,Mycobacterium\_indicus\_pranii\_MTCC\_9506.1232724,Arthrobacter\_arilaitensis.256701,Corynebacterium\_maris\_DSM\_45190.1224163,Actinomyces\_sp.\_oral\_taxon\_414.712122,Corynebacterium\_sp.\_ATCC\_6931.1487956,Mycobacterium\_sp.\_EPa45.1545728
- 14 Arthrobacter\_sp.\_FB24.290399,Mycobacterium\_sp.\_KMS.189918,Arthrobacter\_sp.\_IHBB\_11108.1618207,Mycobacterium\_bovis\_BCG.33892,Cellulomonas\_flavigena\_DSM\_20109.446466,Corynebacterium\_halotolerans\_YIM\_70093\_\_\_\_DSM\_44683.1121362,Arthrobacter\_alpinus.656366,Propionibacterium\_freudenreichii\_subsp.\_shermanii\_CIRM-BIA1.754252,Corynebacterium\_ureicelerivorans.401472,Actinomyces\_oris.544580
- 15 Rathayibacter\_toxicus.145458,Propionibacterium\_acidipropionici\_ATCC\_4875.1171373,Saccharopolyspora\_erythraea\_NRRL\_2338.405948,Geodermatophilus\_obscurus\_DSM\_43160.526225,Streptomyces\_ambofaciens\_ATCC\_23877.278992,Arthrobacter\_phenanthrenivorans\_Sphe3.930171,Corynebacteriales\_bacterium\_X1698.1562462,Mycobacterium\_sp.\_MCS.164756,Bifidobacterium\_indicum\_LMG\_11587\_\_\_\_DSM\_20214.1341694,Corynebacterium\_glutamicum\_R.340322
- 16 Corynebacteriales\_bacterium\_X1698.1562462,Nocardia\_nova\_SH22a.1415166,Streptomyces\_pratensis\_ATCC\_33331.591167,Streptomyces\_avermitilis\_MA-4680\_\_\_\_NBRC\_14893.227882,Corynebacterium\_resistens\_DSM\_45100.662755,Streptomyces\_vietnamensis.362257,Streptomyces\_glaucescens.1907,Leifsonia\_xylii\_subsp.\_cynodontis\_DSM\_46306.1389489,Bifidobacterium\_longum\_subsp.\_infantis\_ATCC\_15697\_\_\_\_JCM\_1222\_\_\_\_DSM\_20088.391904,Frankia\_sp.\_CcI3.106370
- 17 Corynebacterium\_camporealensis.161896,Kocuria\_palustris.71999,Streptomyces\_sp.\_769.1262452,Mycobacterium\_ulcerans\_Agy99.362242,Tropheryma\_whipplei\_str.\_Twist.203267,Streptomyces\_sp.\_SirexAA-E.862751,Cellulomonas\_flavigena\_DSM\_20109.446466,Propionibacterium\_avidum\_44067.1170318,Streptomyces\_violaceusniger\_Tu\_4113.653045,Clavibacter\_michiganensis\_subsp.\_sepedonicus.31964
- 18 Mycobacterium\_yongonense\_05-1390.1138871,Corynebacterium\_urealyticum\_DSM\_7109.504474,Aeromicrobium\_erythreum.2041,Olsenella\_sp.\_oral\_taxon\_807.712411,Bifidobacterium\_breve.1685,Olsenella\_uli\_DSM\_7084.633147,Actinomyces\_meyeri.52773,Corynebacterium\_kroppenstedtii\_DSM\_44385.645127,Corynebacterium\_doosanense\_CAU\_212\_\_\_\_DSM\_45436.558173,Corynebacterium\_testudinoris.136857
- 19 Gordonia\_polyisoprenivorans\_VH2.1112204,Stackebrandtia\_nassauensis\_DSM\_44728.446470,Microbacterium\_testaceum\_STLB037.979556,Xylanimonas\_cellulosilytica\_DSM\_15894.446471,Arthrobacter\_sp.\_LS16.1690248,Corynebacterium\_diphtheriae\_31A.698962,Frankia\_alni\_ACN14a.326424,Rathayibacter\_toxicus.145458,Bifidobacterium\_breve.1685,Arthrobacter\_sp.\_Rue61a.1118963

10 **Table S23** List of 17 Actinobacteria (ACT) species kept for 20 permutations under MID17 random sampling scenarios (RSS).

RSS species kept

- 0 Mycobacterium\_sp.\_KMS.189918,Streptomyces\_pristinaespiralis.38300,Streptomyces\_violaceusniger\_Tu\_4113.653045,Arthrobacter\_sp.\_Rue61a.1118963,Rothia\_dentocariosa\_ATCC\_17931.762948,Conexibacter\_woesei\_DSM\_14684.469383,Arcanobacterium\_haemolyticum\_DSM\_20595.644284,Arthrobacter\_phenanthrenivorans\_Sphe3.930171,Propionibacterium\_acidipropionici\_ATCC\_4875.1171373,Microbacterium\_sp.\_PAMC\_28756.1795053,Corynebacterium\_singulare.161899,Streptomyces\_albus.1888,Mycobacterium\_kansasii\_ATCC\_12478.557599,Microbacterium\_sp.\_No.\_7.1714373,Arthrobacter\_sp.\_ATCC\_21022.1771959,Bifidobacterium\_catenuatum\_DSM\_16992\_\_\_\_JCM\_1194\_\_\_\_LMG\_11043.566552,Micromonospora\_aurantiaca\_ATCC\_27029.644283
- 1 Amycolatopsis\_lurida\_NRRL\_2430.1460371,Arthrobacter\_phenanthrenivorans\_Sphe3.930171,Leifsonia\_xyli\_subsp.\_cyodontis\_DSM\_46306.1389489,Frankia\_alni\_ACN14a.326424,Kibdelosporangium\_phytohabitans.860235,Rhodococcus\_jostii\_RHA1.101510,Microbacterium\_sp.\_PAMC\_28756.1795053,Nocardia\_brasiliensis\_ATCC\_700358.1133849,Gordonia\_polyisoprenivorans\_VH2.1112204,Arsenicococcus\_sp.\_oral\_taxon\_190.1658671,Streptomyces\_xiamenensis.408015,Corynebacterium\_casei\_LMG\_S-19264.1285583,Brachybacterium\_faecium\_DSM\_4810.446465,Saccharopolyspora\_erythraea\_NRRL\_2338.405948,Streptomyces\_cyaneogriseus\_subsp.\_noncyanogenus.477245,Actinobacteria\_bacterium\_IMCC26256.1650658,Slackia\_hellotrinireducens\_DSM\_20476.471855
- 2 Gordonia\_sp.\_KTR9.337191,Arthrobacter\_sp.\_IHBB\_11108.1618207,Blastococcus\_saxosidens\_DD2.1146883,Arthrobacter\_phenanthrenivorans\_Sphe3.930171,Arthrobacter\_sp.\_FB24.290399,Arthrobacter\_sp.\_ERGS1\_01.1704044,Mycobacterium\_leprae\_Br4923.561304,Kutzneria\_albida\_DSM\_43870.1449976,Frankia\_sp.\_Ccl3.106370,Corynebacteriales\_bacterium\_X1036.1528099,Corynebacterium\_glutamicum\_R.340322,Arthrobacter\_arilaitensis.256701,Nocardia\_nova\_S\_H22a.1415166,Corynebacterium\_callunae\_DSM\_20147.1121353,Atopobium\_parvulum\_DSM\_20469.521095,Saccharopolyspora\_erythraea\_NRRL\_2338.405948,Pseudonocardia\_sp.\_EC080625-04.1096868
- 3 Bifidobacterium\_adolescentis.1680,Actinoplanes\_missouriensis\_431.512565,Corynebacterium\_sp.\_ATCC\_6931.1487956,Acidothermus\_cellulolyticus\_11B.351607,Actinoplanes\_friuliensis\_DSM\_7358.1246995,Corynebacterium\_glutamicum\_R.340322,Mycobacterium\_avium\_104.243243,Mycobacterium\_intracellulare\_MOTT-64.1138383,Actinoplanes\_sp.\_SE50\_110.134676,Mycobacterium\_vanbaalenii\_PYR-1.350058,Streptomyces\_pristinaespiralis.38300,Kutzneria\_albida\_DSM\_43870.1449976,Arthrobacter\_sp.\_FB24.290399,Arthrobacter\_sp.\_LS16.1690248,Coriobacterium\_glomerans\_PW2.700015,Pimelobacter\_simplex.2045,Mycobacterium\_sp.\_MCS.164756
- 4 Corynebacterium\_kroppenstedtii\_DSM\_44385.645127,Mycobacterium\_leprae\_Br4923.561304,Amycolatopsis\_japonica.208439,Segniliparus\_rotundus\_DSM\_44985.640132,Rubrobacter\_radiotolerans.42256,Mycobacterium\_kansasii\_ATCC\_12478.557599,Nocardia\_brasiliensis\_ATCC\_700358.1133849,Mycobacterium\_haemophilum\_DSM\_44634.1202450,Actinomyces\_oris.544580,Actinotignum\_schaalii.59505,Corynebacterium\_ureicelerivorans.401472,Propionibacterium\_freudenreichii\_subsp.\_shermanii\_CIRM-BIA1.754252,Brevibacterium\_flavum.92706,Microlunatus\_phosphovorax\_NM-1.1032480,Mycobacterium\_ulcerans\_Agy99.362242,Arthrobacter\_sp.\_PAMC25486.1494608,Corynebacterium\_sp.\_ATCC\_C\_6931.1487956
- 5 Streptomyces\_reticuli.1926,Propionibacterium\_propionicum\_F0230a.767029,Rothia\_dentocariosa\_ATCC\_17931.762948,Propionibacterium\_avidum\_44067.1170318,Streptomyces\_sp.\_SirexAA-E.862751,Nocardia\_farcinica.37329,Corynebacterium\_vitaeruminis\_DSM\_20294.1224164,Mycobacterium\_indicus\_pranii\_MTCC\_9506.1232724,Thermobifida\_fusca\_YX.269800,Mycobacterium\_chubuense\_NBB4.710421,Corynebacteriales\_bacterium\_X1698.1562462,Bifidobacterium\_dentium\_JCM\_1195\_\_\_\_DSM\_20436.1150423,Gordonia\_polyisoprenivorans\_VH2.1112204,Arthrobacter\_sulfonivorans.121292,Catenulispora\_acidiphila\_DSM\_44928.479433,Coriobacterium\_glomerans\_PW2.700015,Mycobacterium\_ulcerans\_Agy99.362242
- 6 Intraporangium\_calvum\_DSM\_43043.710696,Rothia\_mucilaginos\_a\_DY-18.680646,Frankia\_sp.\_Ccl3.106370,Pseudonocardia\_sp.\_EC080625-04.1096868,Actinoplanes\_missouriensis\_431.512565,Bifidobacterium\_angulatum\_DSM\_20098\_\_\_\_JCM\_7096.518635,Arthrobacter\_sp.\_PAMC25486.1494608,Amycolatopsis\_lurida\_NRRL\_2430.1460371,Corynebacterium\_ureicelerivorans.401472,Nakamurella\_multipartita\_DSM\_44233.479431,Mycobacterium\_neoaurum\_VKM\_Ac-1815D.700508,Rubrobacter\_radiotolerans.42256,Corynebacterium\_diphtheriae\_31A.698962,Arthrobacter\_sp.\_IHBB\_11108.1618207,Corynebacterium\_aurimucosum\_ATCC\_700975.548476,Rathayibacter\_toxicus.145458,Scardovia\_inopinata\_JCM\_12537.1150468
- 7 Corynebacterium\_mustelae.571915,Corynebacterium\_efficiens\_YS-314.196164,Arthrobacter\_sp.\_ERGS1\_01.1704044,Streptomyces\_albus.1888,Arthrobacter\_sp.\_Rue61a.1118963,Arthrobacter\_sp.\_PAMC25486.1494608,Actinomyces\_oris.544580,Adlercreutzia\_equilifaciens\_DSM\_19450.1384484,Jonesia\_denitrificans\_DSM\_20603.471856,Corynebacterium\_humireducens\_NBRC\_106098\_\_\_\_DSM\_45392.1223515,Saccharomonospora\_viridis\_DSM\_43017.471857,Mycobacterium\_gilvum\_PYR-GCK.350054,Actinoplanes\_sp.\_SE50\_110.134676,Coriobacterium\_glomerans\_PW2.700015,Nocardia\_farcinica.37329,Corynebacterium\_lactis\_RW2-5.1408189,Corynebacterium\_glutamicum\_R.340322

- 8 Mycobacterium\_sp.\_VKM\_Ac-1817D.1273687,Corynebacterium\_imitans.156978,Bifidobacterium\_asteroides\_PRL2011.1147128,Mycobacterium\_sp.\_KMS.189918,Arthrobacter\_sp.\_YC-RL1.1652545,Kribbella\_flavida\_DSM\_17836.479435,Microterricola\_viridarii.412690,Microlunatus\_phosphovorus\_NM-1.1032480,Streptomyces\_sp.\_CdTB01.1725411,Rubrobacter\_radiotolerans.42256,Coriobacteriaceae\_bacterium\_68-1-3.1531429,Pseudonocardia\_sp.\_HH130629-09.1641402,Bifidobacterium\_angulatum\_DSM\_20098\_\_\_\_JCM\_7096.518635,Arthrobacter\_sp.\_Rue61a.1118963,Corynebacterium\_argentoratense\_DSM\_44202.1348662,Microbacterium\_sp.\_No.\_7.1714373,Streptomyces\_glaucescens.1907
- 9 Mycobacterium\_haemophilum\_DSM\_44634.1202450,Streptomyces\_venezuelae.54571,Corynebacterium\_urealyticum\_DSM\_7109.504474,Arthrobacter\_sulfonivorans.121292,Kytococcus\_sedentarius\_DSM\_20547.478801,Jonesia\_denitrificans\_DSM\_20603.471856,Streptomyces\_sp.\_4F.1751294,Gordonia\_polyisoprenivorans\_VH2.1112204,Arthrobacter\_aurescens\_TC1.290340,Gordonia\_sp.\_QH-11.1136941,Streptomyces\_xiamenensis.408015,Rathayibacter\_toxicus.145458,Mycobacterium\_sp.\_EPa45.1545728,Amycolatopsis\_japonica.208439,Gordonia\_sp.\_KTR9.337191,Kitasatospora\_setae\_KM-6054.452652,Mycobacterium\_marinum\_M.216594
- 10 Corynebacteriales\_bacterium\_X1036.1528099,Nakamurella\_multipartita\_DSM\_44233.479431,Microlunatus\_phosphovorus\_NM-1.1032480,Mycobacterium\_liflandii\_128FXT.459424,Pseudonocardia\_dioxanivorans\_CB1190.675635,Streptomyces\_ambofaciens\_ATCC\_23877.278992,Actinoplanes\_sp.\_N902-109.649831,Kocuria\_palustris.71999,Streptomyces\_violaceusniger\_Tu.4113.653045,Streptomyces\_xiamenensis.408015,Kineococcus\_radiotolerans\_SRS30216\_\_\_\_ATCC\_BAA-149.266940,Propionibacterium\_acidipropionici\_ATCC\_4875.1171373,Salinispora\_tropica\_CNB-440.369723,Rubrobacter\_radiotolerans.42256,Corynebacterium\_doosanense\_CAU\_212\_\_\_\_DSM\_45436.558173,Blastococcus\_saxobidens\_DD2.1146883,Rhodococcus\_opacus\_PD630.543736
- 11 Actinomyces\_meyeri.52773,Corynebacterium\_halotolerans\_YIM\_70093\_\_\_\_DSM\_44683.1121362,Mycobacterium\_yongonense\_05-1390.1138871,Frankia\_sp.\_Ccl3.106370,Arthrobacter\_sulfonivorans.121292,Bifidobacterium\_dentium\_JCM\_1195\_\_\_\_DSM\_20436.1150423,Pseudonocardia\_sp.\_EC080619-01.1096856,Mycobacterium\_sp.\_MCS.164756,Micromonospora\_aurantiaca\_ATCC\_27029.644283,Corynebacterium\_testudinoris.136857,Xylanimonas\_cellulosilytica\_DSM\_15894.446471,Cryptobacterium\_curtum\_DSM\_15641.469378,Arthrobacter\_sp.\_FB24.290399,Micrococcus\_luteus\_NCTC\_2665.465515,Thermobifida\_fusca\_YX.269800,Streptomyces\_sp.\_PAMC26508.1265601,Mycobacterium\_marinum\_M.216594
- 12 Arthrobacter\_sp.\_LS16.1690248,Intrasporangium\_calvum\_DSM\_43043.710696,Streptomyces\_griseus\_subsp.\_griseus\_NBRC\_13350.455632,Pseudonocardia\_sp.\_HH130629-09.1641402,Streptomyces\_pratensis\_ATCC\_33331.591167,Bifidobacterium\_catenuatum\_DSM\_16992\_\_\_\_JCM\_1194\_\_\_\_LMG\_11043.566552,Rhodococcus\_opacus\_PD630.543736,Mycobacterium\_chubuense\_NBB4.710421,Corynebacterium\_argentoratense\_DSM\_44202.1348662,Rhodococcus\_sp.\_B7740.1564114,Gordonia\_bronchialis\_DSM\_43247.526226, Frankia\_symbiont\_of\_Datisca\_glomerata.656024, Brevibacterium\_flavum.92706,Salinispora\_tropica\_CNB-440.369723,Actinotignum\_schaalii.59505,Beutenbergia\_cavernae\_DSM\_12333.471853,Jonesia\_denitrificans\_DSM\_20603.471856
- 13 Corynebacterium\_casei\_LMG\_S-19264.1285583,Streptomyces\_fulvissimus\_DSM\_40593.1303692,Jonesia\_denitrificans\_DSM\_20603.471856,Rhodococcus\_opacus\_PD630.543736,Corynebacterium\_callunae\_DSM\_20147.1121353,Tropheryma\_whipplei\_str.\_Twist.203267,Mycobacterium\_sinense.875328,Slackia\_heliotrinireducens\_DSM\_20476.471855,Rhodococcus\_jostii\_RHA1.101510,Mycobacterium\_gilvum\_PYR-GCK.350054,Streptomyces\_sp.\_CNQ-509.444103,Arthrobacter\_sp.\_FB24.290399,Pseudonocardia\_dioxanivorans\_CB1190.675635,Corynebacterium\_testudinoris.136857,Coriobacterium\_glomerans\_PW2.700015,Rubrobacter\_radiotolerans.42256,Mycobacterium\_chubuense\_NBB4.710421
- 14 Mycobacterium\_vanbaalenii\_PYR-1.350058,Kitasatospora\_setae\_KM-6054.452652,Arthrobacter\_sp.\_PAMC25486.1494608,Corynebacterium\_mustelae.571915,Intrasporangium\_calvum\_DSM\_43043.710696,Mycobacterium\_indicus\_pranii\_MTCC\_9506.1232724,Salinispora\_arenicola\_CNS-205.391037,Mycobacterium\_kansasii\_ATCC\_12478.557599,Microbacterium\_testaceum\_StLB037.979556,Kibdelosporangium\_phytohabitans.860235,Arthrobacter\_sp.\_IHBB\_11108.1618207,Corynebacterium\_efficiens\_YS-314.196164,Corynebacterium\_pseudotuberculosis.1719,Catenulispora\_acidiphila\_DSM\_44928.479433,Mycobacterium\_ipeprae\_Br4923.561304,Bifidobacterium\_pseudocatenuatum\_DSM\_20438\_\_\_\_JCM\_1200\_\_\_\_LMG\_10505.547043,Actinomyces\_radicidentis.111015
- 15 Actinoplanes\_sp.\_SE50\_110.134676,Arthrobacter\_sp.\_YC-RL1.1652545,Bifidobacterium\_animalis\_subsp.\_lactis\_CNMC-I-2494.1042403,Corynebacterium\_kutscheri.35755,Adlercreutzia\_equolifaciens\_DSM\_19450.1384484,Microbacterium\_sp.

\_PAMC\_28756.1795053,Bifidobacterium\_thermophilum\_RBL67.1254439,Corynebacterium\_lactis\_RW2-5.1408189,Bifidobacterium\_asteroides\_PRL2011.1147128,Corynebacterium\_kroppenstedtii\_DSM\_44385.645127,Mycobacterium\_rhodesiae\_NBB3.710685,Mycobacterium\_sinense.875328,Mycobacterium\_microti.1806,Actinomyces\_oris.544580,Bifidobacterium\_bifidum.1681,Arthrobacter\_alpinus.656366,Bifidobacterium\_adolescentis.1680

16 Streptomyces\_violaceusniger\_Tu\_4113.653045,Microbacterium\_testaceum\_StLB037.979556,Nocardia\_nova\_SH22a.1415166,Corynebacterium\_callunae\_DSM\_20147.1121353,Mycobacterium\_rhodesiae\_NBB3.710685,Acidothermus\_cellulolyticus\_11B.351607,Streptomyces\_hygroscopicus\_subsp.\_jinggangensis\_5008.1133850,Pseudonocardia\_sp.\_AL041005-10.445576,Geodermatophilus\_obscurus\_DSM\_43160.526225,Micromonospora\_aurantiaca\_ATCC\_27029.644283,Cellulomonas\_fimi\_ATCC\_484.590998,Streptomyces\_sp.\_Mg1.465541,Streptomyces\_collinus\_Tu\_365.1214242,Kibdelosporangium\_phytohabitans.860235,Bifidobacterium\_indicum\_LMG\_11587\_\_\_\_DSM\_20214.1341694,Olsenella\_sp.\_oral\_taxon\_807.712411,Slackia\_heliotrinireducens\_DSM\_20476.471855

17 Thermobispora\_bispora\_DSM\_43833.469371,Pseudonocardia\_sp.\_HH130629-09.1641402,Amycolatopsis\_japonica.208439,Amycolatopsis\_lurida\_NRRL\_2430.1460371,Corynebacterium\_kutscheri.35755,Corynebacterium\_doosanense\_CAU\_212\_\_\_\_DSM\_45436.558173,Micromonospora\_sp.\_L5.648999,Corynebacterium\_falsenii\_DSM\_44353.1451189,Bifidobacterium\_animalis\_subsp.\_lactis\_CNCM\_I-2494.1042403,Mycobacterium\_tuberculosis.1773,Arthrobacter\_sp.\_ERGS1\_01.1704044,Salinispora\_tropica\_CNB-440.369723,Corynebacterium\_mustelae.571915,Streptomyces\_globisporus\_C-1027.1172567,Bifidobacterium\_indicum\_LMG\_11587\_\_\_\_DSM\_20214.1341694,Corynebacterium\_callunae\_DSM\_20147.1121353,Corynebacterium\_efficiens\_YS-314.196164

18 Actinoplanes\_friuliensis\_DSM\_7358.1246995,Arthrobacter\_sulfonivorans.121292,Corynebacterium\_kroppenstedtii\_DSM\_44385.645127,Corynebacterium\_glyciniphilum\_AJ\_3170.1404245,Propionibacterium\_propionicum\_F0230a.767029,Stactobacterium\_nassauensis\_DSM\_44728.446470,Corynebacterium\_vitaeruminis\_DSM\_20294.1224164,Microbacterium\_sp.\_CGR1.1696072,Arthrobacter\_alpinus.656366,Corynebacterium\_callunae\_DSM\_20147.1121353,Micrococcus\_luteus\_NCTC\_2665.465515,Coriobacteriaceae\_bacterium\_68-1-3.1531429,Actinoplanes\_sp.\_N902-109.649831,Bifidobacterium\_breve.1685,Arthrobacter\_sp.\_A3.595593,Corynebacterium\_aurimucosum\_ATCC\_700975.548476,Corynebacterium\_resistens\_DSM\_45100.662755

19 Illuminibacter\_coccineus\_YM16-304.1313172,Arthrobacter\_alpinus.656366,Rubrobacter\_xylanophilus\_DSM\_9941.266117,Coriobacteriaceae\_bacterium\_68-1-3.1531429,Mycobacterium\_africanum.33894,Rhodococcus\_sp.\_B7740.1564114,Nocardiopsis\_alba\_ATCC\_BAA-2165.1205910,Corynebacterium\_singulare.161899,Corynebacterium\_glyciniphilum\_AJ\_3170.1404245,Rhodococcus\_erythropolis\_PR4.234621,Olsenella\_sp.\_oral\_taxon\_807.712411,Nocardia\_nova\_SH22a.1415166,Microbacterium\_sp.\_CGR1.1696072,Mycobacterium\_sp.\_JLS.164757,Catenulispora\_acidiphila\_DSM\_44928.479433,Streptomyces\_sp.\_Mg1.465541,Actinoplanes\_friuliensis\_DSM\_7358.1246995

13 **Table S24** List of 19 Actinobacteria (ACT) species kept for 20 permutations under MID19 random sampling scenarios (RSS).

| RSS | species kept                                                                                                                                                                                                                                                                                                                                                                                                                                                                                                                                                                                                                                                                                                                                                                                                                                                                                                                                                                       |
|-----|------------------------------------------------------------------------------------------------------------------------------------------------------------------------------------------------------------------------------------------------------------------------------------------------------------------------------------------------------------------------------------------------------------------------------------------------------------------------------------------------------------------------------------------------------------------------------------------------------------------------------------------------------------------------------------------------------------------------------------------------------------------------------------------------------------------------------------------------------------------------------------------------------------------------------------------------------------------------------------|
| 0   | <i>Amycolatopsis_methanolica_239.1068978</i> , <i>Streptomyces_violaceusniger_Tu_4113.653045</i> , <i>Amycolatopsis_lurida_NRR L_2430.1460371</i> , <i>Mycobacterium_kansasii_ATCC_12478.557599</i> , <i>Corynebacterium_terpenotabidum_Y-11.1200352</i> , <i>Corynebacterium_variabile_DSM_44702.858619</i> , <i>Blastococcus_saxobsidens_DD2.1146883</i> , <i>Arthrobacter_s p_LS16.1690248</i> , <i>Mycobacterium_sp._EPa45.1545728</i> , <i>Propionibacterium_freudenreichii_subsp._shermanii_CIRM-BIA1.754252</i> , <i>Tropheryma_whipplei_str._Twist.203267</i> , <i>Streptomyces_venezuelae.54571</i> , <i>Modestobacter_marinus.4776 41</i> , <i>Mycobacterium_yongonense_05-1390.1138871</i> , <i>Corynebacterium_maris_DSM_45190.1224163</i> , <i>Bifidobacterium_pseudocatenulatum_DSM_20438_ JCM_1200_ LMG_10505.547043</i> , <i>Slackia_heliotrinireducens_DSM_20476.471855</i> , <i>Dermacoccus_nishinomiyaensis.1274</i> , <i>Isoptricola_variabilis_225.743718</i> |
| 1   | <i>Streptomyces_collinus_Tu_365.1214242</i> , <i>Propionibacterium_acnes_C1.1234380</i> , <i>Actinoplanes_missouriensis_431.5125 65</i> , <i>Streptomyces_sp._769.1262452</i> , <i>Arthrobacter_alpinus.656366</i> , <i>Rhodoluna_lacicola.529884</i> , <i>Frankia_sp._EAN1pec.29 8653</i> , <i>Pseudonocardia_sp._EC080610-09.1688404</i> , <i>Arthrobacter_aurescens_TC1.290340</i> , <i>Mycobacterium_sp._MOTT36Y.1168287</i> , <i>Bifidobacterium_kashiwano hense_JCM_15439_ DSM_21854.1150460</i> , <i>Corynebacterium_kroppenstedtii_DSM_44385.645127</i> , <i>Rhodococcus_sp._ B7740.1564114</i> , <i>Tsakumurella_paurometabola_DSM_20162.521096</i> , <i>Rathayibacter_toxicus.145458</i> , <i>Mycobacterium_gil vum_PYR-GCK.350054</i> , <i>Coriobacterium_glomerans_PW2.700015</i> , <i>Microbacterium_sp._CGR1.1696072</i> , <i>Frankia_sp._Eul1c.298654</i>                                                                                                           |
| 2   | <i>Micrococcus_luteus_NCTC_2665.465515</i> , <i>Bifidobacterium_breve.1685</i> , <i>Geodermatophilus_obscurus_DSM_43160.5262 25</i> , <i>Eggerthella_lenta_DSM_2243.479437</i> , <i>Rhodococcus_opacus_PD630.543736</i> , <i>Mycobacterium_chubuense_NBB4.71 0421</i> , <i>Scardovia_inopinata_JCM_12537.1150468</i> , <i>Mycobacterium_gilvum_PYR-GCK.350054</i> , <i>Streptomyces_bingchenggensis_BCW-1.749414</i> , <i>Pseudonocardia_dioxanivorans_CB1190.675635</i> , <i>Kribbella_flavida_DSM_17836.479435</i> , <i>Amycolatopsis_orien talis_HCCB10007.1156913</i> , <i>Bifidobacterium_coryneforme.1687</i> , <i>Olsenella_uli_DSM_7084.633147</i> , <i>Actinoplanes_sp._N9 02-109.649831</i> , <i>Corynebacterium_halotolerans_YIM_70093_ DSM_44683.1121362</i> , <i>Corynebacterium_imitans.156978</i> , <i>Bifi dobacterium_thermophilum_RBL67.1254439</i> , <i>Rhodococcus_erythropolis_PR4.234621</i>                                                                 |
| 3   | <i>Streptomyces_collinus_Tu_365.1214242</i> , <i>Frankia_symbiont_of_Datisca_glomerata.656024</i> , <i>Mycobacterium_gilvum_PY R-GCK.350054</i> , <i>Pseudonocardia_sp._AL041005-10.445576</i> , <i>Dermacoccus_nishinomiyaensis.1274</i> , <i>Nocardia_brasiliensis_ATCC_700358.1133849</i> , <i>Mycobacterium_kansa sii_ATCC_12478.557599</i> , <i>Corynebacterium_doosanense_CAU_212_ DSM_45436.558173</i> , <i>Corynebacteriales_bacteri um_X1698.1562462</i> , <i>Microbacterium_sp._XT11.367477</i> , <i>Mycobacterium_fortuitum.1766</i> , <i>Cellulomonas_flavigena_DSM_20109.446466</i> , <i>Actinosynnema_mirum_DSM_43827.446462</i> , <i>Corynebacterium_deserti_GIMN1.010.931089</i> , <i>Corynebact erium_glyciniphilum_AJ_3170.1404245</i> , <i>Bifidobacterium_pseudocatenulatum_DSM_20438_ JCM_1200_ LMG_1050 5.547043</i> , <i>Corynebacterium_ureicelerivorans.401472</i> , <i>Cryptobacterium_curtum_DSM_15641.469378</i> , <i>Gordonia_sp._KTR 9.337191</i>    |
| 4   | <i>Mycobacterium_vanbaalenii_PYR-1.350058</i> , <i>Corynebacterium_mustelae.571915</i> , <i>Arthrobacter_sp._ERGS1_01.1704044</i> , <i>Brachybacterium_faecium_DSM_4810.446465</i> , <i>Streptomyces_cyaneogriseus_subsp._noncyanogenus.477245</i> , <i>Streptomyces_violaceusniger_Tu_4113.65 3045</i> , <i>Bifidobacterium_asteroides_PRL2011.1147128</i> , <i>Streptomyces_sp._769.1262452</i> , <i>Nocardia_farcinica.37329</i> , <i>Bifidob acterium_coryneforme.1687</i> , <i>Arthrobacter_aurescens_TC1.290340</i> , <i>Corynebacterium_singulare.161899</i> , <i>Mycobacterium_ sp._KMS.189918</i> , <i>Nocardia_nova_SH22a.1415166</i> , <i>Olsenella_uli_DSM_7084.633147</i> , <i>Amycolatopsis_orientalis_HCCB1 0007.1156913</i> , <i>Mycobacterium_sp._JLS.164757</i> , <i>Streptomyces_fulvissimus_DSM_40593.1303692</i> , <i>Bifidobacterium_ani malis_subsp._lactis_CNCM_I-2494.1042403</i>                                                                         |
| 5   | <i>Corynebacterium_glyciniphilum_AJ_3170.1404245</i> , <i>Corynebacterium_maris_DSM_45190.1224163</i> , <i>Pseudonocardia_dio xanivorans_CB1190.675635</i> , <i>Pseudonocardia_sp._AL041005-10.445576</i> , <i>Mycobacterium_tuberculosis.1773</i> , <i>Bifidobacterium_asteroides_PRL2011.1147128</i> , <i>Conexibacter_woesei_DS M_14684.469383</i> , <i>Mycobacterium_sinense.875328</i> , <i>Streptomyces_vietnamensis.362257</i> , <i>Tsakumurella_paurometabola_ DSM_20162.521096</i> , <i>Arthrobacter_sp._ATCC_21022.1771959</i> , <i>Actinoplanes_missouriensis_431.512565</i> , <i>Actinomyces_o ris.544580</i> , <i>Microclunatus_phosphovorans_NM-1.1032480</i> , <i>Streptomyces_albus.1888</i> , <i>Mycobacterium_yongonense_05-1390.1138871</i> , <i>Bifidobacterium_adolescentis.1680</i> , <i>Atopobium_parvulum_DSM_20469.521095</i> , <i>Frankia_sp._Eul1c.2986 54</i>                                                                                          |
| 6   | <i>Frankia_sp._EAN1pec.298653</i> , <i>Propionibacterium_avidum_44067.1170318</i> , <i>Corynebacteriales_bacterium_X1698.15624 62</i> , <i>Bifidobacterium_scardovii_JCM_12489_ DSM_13734.1150461</i> , <i>Pimelobacter_simplex.2045</i> , <i>Nocardia_nova_SH22 a.1415166</i> , <i>Actinosynnema_mirum_DSM_43827.446462</i> , <i>Corynebacterium_glyciniphilum_AJ_3170.1404245</i> , <i>Mycobacter ium_marinum_M.216594</i> , <i>Mycobacterium_sp._MCS.164756</i> , <i>Arthrobacter_sp._YC-RL1.1652545</i> , <i>Frankia_sp._Eul1c.298654</i> , <i>Bifidobacterium_catenulatum_DSM_16992_ JCM_1194_ LMG_11043.566</i>                                                                                                                                                                                                                                                                                                                                                              |

- 552, *Cellulomonas gilvus* ATCC\_13127.593907, *Arcanobacterium haemolyticum* DSM\_20595.644284, *Corynebacterium urealyticum* DSM\_7109.504474, *Streptomyces lydicus* A02.1403539, *Rhodococcus jostii* RHA1.101510, *Thermomonospora curvata* DSM\_43183.471852
- 7 Bifidobacterium\_indicum\_LMG\_11587\_\_\_DSM\_20214.1341694, *Corynebacterium uterequi*.1072256, *Bifidobacterium\_s cardovii*\_JCM\_12489\_\_\_DSM\_13734.1150461, *Mycobacterium microti*.1806, *Streptomyces*\_sp\_.769.1262452, *Mycobacterium abscessus*\_subsp.\_bolletii\_50594.1303024, *Actinosynnema mirum*\_DSM\_43827.446462, *Rothia mucilaginosa*\_D Y-18.680646, *Corynebacteriales bacterium*\_X1698.1562462, *Corynebacterium doosanense*\_CAU\_212\_\_\_DSM\_45436.558173, *Mycobacterium gilvum*\_PYR-GCK.350054, *Actinotignum schaalii*.59505, *Kribbella flavida*\_DSM\_17836.479435, *Mycobacterium rhodesiae*\_NBB3.710685, *Corynebacterium vitaeruminis*\_DSM\_20294.1224164, *Bifidobacterium kashiwanohense*\_JCM\_15439\_\_\_DSM\_21854.1150460, *Corynebacterium argentoratense*\_DSM\_44202.1348662, *Streptomyces ambofaciens*\_ATCC\_23877.278992, *Nocardioopsis dassonvillei*\_subsp.\_dassonvillei\_DSM\_43111.446468
- 8 *Pseudonocardia*\_sp.\_EC080610-09.1688404, *Streptomyces pratensis*\_ATCC\_33331.591167, *Streptomyces avermitilis*\_MA-4680\_\_\_NBRC\_14893.227882, *Kibdelosporangium phytohabitans*.860235, *Devriesea agamarum*.472569, *Brevibacterium flavum*.92706, *Corynebacterium glutamicum*\_R.340322, *Actinomyces meyeri*.52773, *Aeromicrobium erythreum*.2041, *Bifidobacterium animalis*\_subsp.\_lactis\_CNCM\_I-2494.1042403, *Luteipulveratus mongoliensis*.571913, *Salinispora arenicola*\_CNS-205.391037, *Arsenicicoccus*\_sp.\_oral\_taxon\_190.1658671, *Micromonospora aurantiaca*\_ATCC\_27029.644283, *Mycobacterium microti*.1806, *Rhodococcus opacus*\_PD630.543736, *Blastococcus saxobsidens*\_DD2.1146883, *Microbacterium*\_sp.\_XT11.367477, *Slackia heliotrinireducens*\_DSM\_20476.471855
- 9 *Beutenbergia cavernae*\_DSM\_12333.471853, *Olsenella*\_sp.\_oral\_taxon\_807.712411, *Actinoplanes*\_sp.\_N902-109.649831, *Streptomyces ambofaciens*\_ATCC\_23877.278992, *Arthrobacter arilaitensis*.256701, *Kytococcus sedentarius*\_DSM\_20547.478801, *Mycobacterium ulcerans*\_Agy99.362242, *Catenulispora acidiphila*\_DSM\_44928.479433, *Streptomyces collinus*\_Tu\_365.1214242, *Kocuria palustris*.71999, *Corynebacterium glutamicum*\_R.340322, *Cellulomonas flavigena*\_DSM\_20109.446466, *Microbacterium*\_sp.\_XT11.367477, *Frankia*\_sp.\_EAN1pec.298653, *Rhodococcus*\_sp.\_B7740.1564114, *Propionibacterium avidum*.44067.1170318, *Saccharomonospora viridis*\_DSM\_43017.471857, *Microterricola viridarii*.412690, *Amycolatopsis japonica*.208439
- 10 *Pseudonocardia*\_sp.\_HH130629-09.1641402, *Arthrobacter sulfonivorans*.121292, *Mycobacterium gilvum*\_PYR-GCK.350054, *Bifidobacterium pseudocatenulatum*\_DSM\_20438\_\_\_JCM\_1200\_\_\_LMG\_10505.547043, *Propionibacterium freudenreichii*\_subsp.\_shermanii\_CIRM-BIA1.754252, *Salinispora tropica*\_CNCB-440.369723, *Mycobacterium microti*.1806, *Bifidobacterium longum*\_subsp.\_infantis\_ATCC\_15697\_\_\_JCM\_1222\_\_\_DSM\_20088.391904, *Kibdelosporangium phytohabitans*.860235, *Corynebacterium deserti*\_GIMN1.010.931089, *Eggerthella*\_sp.\_YY7918.502558, *Corynebacterium mustelae*.571915, *Arthrobacter*\_sp.\_FB24.290399, *Actinoplanes missouriensis*.431.512565, *Geodermatophilus obscurus*\_DSM\_43160.526225, *Streptomyces pratensis*\_ATCC\_33331.591167, *Devriesea agamarum*.472569, *Actinomyces oris*.544580, *Saccharomonospora viridis*\_DSM\_43017.471857
- 11 *Amycolatopsis orientalis*\_HCCB10007.1156913, *Rhodococcus pyridinivorans*\_SB3094.1435356, *Microbacterium testaceum*\_StLB037.979556, *Micromonospora*\_sp.\_L5.648999, *Corynebacterium kroppenstedtii*\_DSM\_44385.645127, *Actinosynnema mirum*\_DSM\_43827.446462, *Mycobacterium rhodesiae*\_NBB3.710685, *Mobiluncus curtisii*\_ATCC\_43063.548479, *Mycobacterium*\_sp.\_JLS.164757, *Frankia alni*\_ACN14a.326424, *Mycobacterium kansasii*\_ATCC\_12478.557599, *Arthrobacter alpinus*.656366, *Bifidobacterium catenulatum*\_DSM\_16992\_\_\_JCM\_1194\_\_\_LMG\_11043.566552, *Streptomyces pristinaespiralis*.38300, *Geodermatophilus obscurus*\_DSM\_43160.526225, *Streptomyces*\_sp.\_Mg1.465541, *Stackebrandtia nassauensis*\_DSM\_44728.446470, *Corynebacterium variable*\_DSM\_44702.858619, *Bifidobacterium angulatum*\_DSM\_20098\_\_\_JCM\_7096.518635
- 12 *Eggerthella lenta*\_DSM\_2243.479437, *Arthrobacter*\_sp.\_Hiyo8.1588023, *Propionibacterium freudenreichii*\_subsp.\_shermanii\_CIRM-BIA1.754252, *Sanguibacter keddieii*\_DSM\_10542.446469, *Streptomyces reticuli*.1926, *Gordonia*\_sp.\_KTR9.337191, *Bifidobacterium adolescentis*.1680, *Dermacoccus nishinomiyaensis*.1274, *Arsenicicoccus*\_sp.\_oral\_taxon\_190.1658671, *Streptomyces globisporus*\_C-1027.1172567, *Bifidobacterium animalis*\_subsp.\_lactis\_CNCM\_I-2494.1042403, *Cellulomonas flavigena*\_DSM\_20109.446466, *Streptomyces pristinaespiralis*.38300, *Corynebacterium lactis*\_RW2-5.1408189, *Nakamurella multipartita*\_DSM\_44233.479431, *Frankia alni*\_ACN14a.326424, *Kineococcus radiotolerans*\_SRS30216\_\_\_ATCC\_BAA-149.266940, *Bifidobacterium bifidum*.1681, *Amycolatopsis japonica*.208439
- 13 *Rothia dentocariosa*\_ATCC\_17931.762948, *Cryptobacterium curtum*\_DSM\_15641.469378, *Amycolatopsis mediterranei*\_S699.713604, *Frankia*\_sp.\_EAN1pec.298653, *Corynebacterium resistens*\_DSM\_45100.662755, *Rhodococcus erythropolis*\_PR4.234621, *Microbacterium*\_sp.\_PAMC\_28756.1795053, *Actinotignum schaalii*.59505, *Corynebacterium halotolerans*\_YIM\_70093\_\_\_DSM\_44683.1121362, *Brevibacterium flavum*.92706, *Amycolicoccus subflavus*\_DQS3-9A1.443218, *Arthrobacter*\_sp.\_ATCC\_21022.1771959, *Streptomyces lydicus*\_A02.1403539, *Corynebacterium jeikeium*\_



K411.306537,*Nocardia\_cyriaci*georgica\_GUH-  
2.1127134,*Acidothermus\_cellulolyticus*\_11B.351607,*Gordonia\_polyisoprenivorans*\_VH2.1112204,*Arthrobacter\_phenanthrenivorans*\_Sphe3.930171,*Bifidobacterium\_adolescentis*.1680

- 14 *Bifidobacterium\_actinocoloniiforme*\_DSM\_22766.1437605,*Actinoplanes\_sp.\_N902*-109.649831,*Mycobacterium\_kansasii*\_ATCC\_12478.557599,*Corynebacterium\_aurimucosum*\_ATCC\_700975.548476,*Kibdelosporangium\_phytohabitans*.860235,*Mycobacterium\_yongonense*\_05-1390.1138871,*Streptomyces\_sp.\_Mg1*.465541,*Bifidobacterium\_coryneforme*.1687,*Adlercreutzia\_euquolifaciens*\_DSM\_19450.1384484,*Amycolatopsis\_japonica*.208439,*Mycobacterium\_africanum*.33894,*Streptomyces\_sp.\_PAMC26508*.1265601,*Trueperella\_pyogenes*\_TP8.1435056,*Arthrobacter\_sulfonivorans*.121292,*Aeromicrobium\_erythreum*.2041,*Brevibacterium\_flavum*.92706,*Coriobacteriaceae\_bacterium*\_68-1-3.1531429,*Corynebacterium\_epidermidicantis*.1050174,*Mycobacterium\_sp.\_JS623*.212767
- 15 *Micrococcus\_luteus*\_NCTC\_2665.465515,*Mycobacterium\_intracellulare*\_MOTT-64.1138383,*Nocardia\_farcinica*.37329,*Cellulomonas\_fimi*\_ATCC\_484.590998,*Rhodococcus\_erythropolis*\_PR4.234621,*Kitasatospora\_setae*\_KM-6054.452652,*Gordonia\_bronchialis*\_DSM\_43247.526226,*Corynebacterium\_variabile*\_DSM\_44702.858619,*Actinosynnema\_mirum*\_DSM\_43827.446462,*Arthrobacter\_sulfonivorans*.121292,*Nocardiopsis\_alba*\_ATCC\_BAA-2165.1205910,*Verrucosipora\_maris\_AB*-18-032.263358,*Corynebacteriales\_bacterium\_X*1698.1562462,*Nocardioides\_sp.\_JS614*.196162,*Streptomyces\_scabiei*\_87.22.680198,*Mycobacterium\_sp.\_JS623*.212767,*Streptomyces\_collinus\_Tu*\_365.1214242,*Rhodococcus\_pyridinivorans*\_SB3094.1435356,*Actinoplanes\_missouriensis*\_431.512565
- 16 *Corynebacterium\_callunae*\_DSM\_20147.1121353,*Mycobacterium\_sp.\_MCS*.164756,*Streptomyces\_albus*.1888,*Amycolaticoccus\_subflavus*\_DQS3-9A1.443218,*Tsukamurella\_paurometabola*\_DSM\_20162.521096,*Tropheryma\_whipplei\_str.\_Twist*.203267,*Streptomyces\_leeuwenhoekii*.1437453,*Mycobacterium\_sinense*.875328,*Streptomyces\_glaucescens*.1907,*Micrococcus\_luteus*\_NCTC\_2665.465515,*Microbacterium\_testaceum*\_StLB037.979556,*Mycobacterium\_chubuense*\_NBB4.710421,*Actinomycetes\_sp.\_oral\_taxon\_414*.712122,*Frankia\_sp.\_EAN1pec*.298653,*Bifidobacterium\_coryneforme*.1687,*Actinoplanes\_missouriensis*\_431.512565,*Kocuria\_rhizophila*\_DC2201.378753,*Mycobacterium\_gilvum\_PYR*-GCK.350054,*Rubrobacter\_radiotolerans*.42256
- 17 *Cellulomonas\_gilvus*\_ATCC\_13127.593907,*Mycobacterium\_africanum*.33894,*Mycobacterium\_gilvum\_PYR*-GCK.350054,*Bifidobacterium\_asteroides*\_PRL2011.1147128,*Streptomyces\_sp.\_Sirex*AA-E.862751,*Corynebacterium\_marinum*\_DSM\_44953.1224162,*Nocardia\_nova*\_SH22a.1415166,*Corynebacterium\_diphtheriae*\_31A.698962,*Brachybacterium\_faecium*\_DSM\_4810.446465,*Rothia\_mucilaginosa\_DY*-18.680646,*Streptomyces\_cattleia\_NRRL\_8057*\_\_\_DSM\_46488.1003195,*Actinomycetes\_radidentis*.111015,*Rhodococcus\_sp.\_B7740*.1564114,*Jonesia\_denitrificans*\_DSM\_20603.471856,*Streptomyces\_cyaneogriseus\_subsp.\_noncyanogenus*.477245,*Corynebacterium\_mustelae*.571915,*Bifidobacterium\_dentium*\_JCM\_1195\_\_\_DSM\_20436.1150423,*Bifidobacterium\_actinocoloniiforme*\_DSM\_22766.1437605,*Kineococcus\_radiotolerans*\_SRS30216\_\_\_ATCC\_BAA-149.266940
- 18 *Kytococcus\_sedentarius*\_DSM\_20547.478801,*Pseudonocardia\_sp.\_EC080619*-01.1096856,*Nocardia\_nova*\_SH22a.1415166,*Mobiluncus\_curtisii*\_ATCC\_43063.548479,*Coriobacterium\_glomerans*\_PW2.700015,*Nocardia\_farcinica*.37329,*Bifidobacterium\_catenulatum*\_DSM\_16992\_\_\_JCM\_1194\_\_\_LMG\_11043.566552,*Microbacterium\_testaceum*\_StLB037.979556,*Corynebacterium\_imitans*.156978,*Amycolatopsis\_methanolica*\_239.1068978,*Thermomonospora\_curvata*\_DSM\_43183.471852,*Tsukamurella\_paurometabola*\_DSM\_20162.521096,*Propionibacterium\_propionicum*\_F0230a.767029,*Nocardiopsis\_alba*\_ATCC\_BAA-2165.1205910,*Actinoplanes\_sp.\_N902*-109.649831,*Cellulomonas\_gilvus*\_ATCC\_13127.593907,*Streptomyces\_glaucescens*.1907,*Arthrobacter\_phenanthrenivorans*\_Sphe3.930171,*Eggerthella\_lenta*\_DSM\_2243.479437
- 19 *Mycobacterium\_yongonense*\_05-1390.1138871,*Nocardiopsis\_dassonvillei\_subsp.\_dassonvillei*\_DSM\_43111.446468,*Geodermatophilus\_obscurus*\_DSM\_43160.526225,*Streptomyces\_xiamenensis*.408015,*Amycolatopsis\_methanolica*\_239.1068978,*Pseudonocardia\_sp.\_A*L04100\_10.445576,*Gardnerella\_vaginalis*\_ATCC\_14019.525284,*Microbacterium\_sp.\_CGR1*.1696072,*Bifidobacterium\_bifidum*.1681,*Rubrobacter\_radiotolerans*.42256,*Streptomyces\_glaucescens*.1907,*Arthrobacter\_sp.\_IHBB*\_11108.1618207,*Corynebacterium\_doosanense*\_CAU\_212\_\_\_DSM\_45436.558173,*Mobiluncus\_curtisii*\_ATCC\_43063.548479,*Leifsonia\_xylii\_subsp.\_cynodontis*\_DSM\_46306.1389489,*Nocardia\_cyriaci*georgica\_GUH-2.1127134,*Mycobacterium\_gilvum\_PYR*-GCK.350054,*Streptomyces\_sp.\_PAMC26508*.1265601,*Renibacterium\_salmoninarum*\_ATCC\_33209.288705

16 **Table S25** List of 32 Actinobacteria (ACT) species kept for 20 permutations under MID32 random sampling scenarios (RSS).

| RSS | species kept                                                                                                                                                                                                                                                                                                                                                                                                                                                                                                                                                                                                                                                                                                                                                                                                                                                                                                                                                                                                                                                                                                                                                                                                                                                                                                                                                                          |
|-----|---------------------------------------------------------------------------------------------------------------------------------------------------------------------------------------------------------------------------------------------------------------------------------------------------------------------------------------------------------------------------------------------------------------------------------------------------------------------------------------------------------------------------------------------------------------------------------------------------------------------------------------------------------------------------------------------------------------------------------------------------------------------------------------------------------------------------------------------------------------------------------------------------------------------------------------------------------------------------------------------------------------------------------------------------------------------------------------------------------------------------------------------------------------------------------------------------------------------------------------------------------------------------------------------------------------------------------------------------------------------------------------|
| 0   | Microbacterium_sp._PAMC_28756.1795053,Kytococcus_sedentarius_DSM_20547.478801,Micromonospora_sp._L5.648999,Pseudonocardia_dioxanivorans_CB1190.675635,Streptomyces_sp._CdTB01.1725411,Kitasatospora_setae_KM-6054.452652,Propionibacterium_acnes_C1.1234380,Streptomyces_vietnamensis.362257,Actinoplanes_missouriensis_431.512565,Clavibacter_michiganensis_subsp._sepedonicus.31964,Mycobacterium_sp._KMS.189918,Nakamurella_multi-<br>partita_DSM_44233.479431,Bifidobacterium_dentium_JCM_1195_DSM_20436.1150423,Cellulomonas_gilvus_ATCC_13127.593907,Olsenella_sp._oral_taxon_807.712411,Streptomyces_sp._769.1262452,Eggerthella_lenta_DSM_2243.479437,Actinomyces_radici-<br>dentis.111015,Arthrobacter_sp._Rue61a.1118963,Thermomonospora_curvata_DSM_43183.471852,Cryptobacterium_curtum_DSM_15641.469378,Arthrobacter_sp._PAMC25486.1494608,Saccharopolyspora_eryth-<br>raea_NRRL_2338.405948,Actinotignum_schaalii.59505,Gordonia_polyisoprenivorans_VH2.1112204,Mycobacterium_go-<br>odii.134601,Mobiluncus_curtisii_ATCC_43063.548479,Mycobacterium_fortuitum.1766,Rubrobacter_radiotolerans.42256,<br>Arthrobacter_chlorophenolicus_A6.452863,Amycolatopsis_orientalis_HCCB10007.1156913,Streptomyces_lydicus_A02-<br>1403539                                                                                                                                          |
| 1   | Mycobacterium_sp._EPa45.1545728,Bifidobacterium_catenulatum_DSM_16992_JCM_1194_LMG_11043.566552,<br>Bifidobacterium_pseudocatenulatum_DSM_20438_JCM_1200_LMG_10505.547043,Streptomyces_hygroscopicus_<br>subsp._jinggangensis_5008.1133850,Streptomyces_sp._CFMR_7.1649184,Streptomyces_glaucescens.1907,Corynebac-<br>terium_jeikeium_K411.306537,Arthrobacter_sp._LS16.1690248,Mycobacterium_haemophilum_DSM_44634.1202450,Ce-<br>llulomonas_fimi_ATCC_484.590998,Rhodococcus_erythropolis_PR4.234621,Mycobacterium_neoaurum_VKM_Ac-<br>1815D.700508,Mycobacterium_ulcerans_Agy99.362242,Actinotignum_schaalii.59505,Streptomyces_scabiei_87.22.6801<br>98,Coriobacterium_glomerans_PW2.700015,Arthrobacter_sp._ERGS1_01.1704044,Corynebacterium_halotolerans_YIM_70093_DSM_44683.1121362,Nocardiopsis_dassonvillei_subsp._dassonvillei_DSM_43111.446468,Streptomyces_sp_769.1262452,Corynebacterium_kroppenstedtii_DSM_44385.645127,Pseudonocardia_sp._HH130629-<br>09.1641402,Mycobacterium_intracellulare_MOTT-64.1138383,Thermobifida_fusca_YX.269800,Rothia_mucilaginoso_DY-<br>18.680646,Bifidobacterium_asteroides_PRL2011.1147128,Arthrobacter_sulfonivorans.121292,Kribbella_flavida_DSM_17836.479435,Intrasporangium_calvum_DSM_43043.710696,Bifidobacterium_pseudolongum_PV8-<br>2.1447715,Bifidobacterium_indicum_LMG_11587_DSM_20214.1341694,Rhodoluna_lacicola.529884 |
| 2   | Rothia_mucilaginoso_DY-18.680646,Geodermatophilus_obscurus_DSM_43160.526225,Streptomyces_vietnamensis.362257,Arthrobacter_sp._YC-RL1.1652545,Pseudonocardia_sp._AL041005-10.445576,Arthrobacter_sp._Hiyo8.1588023,Streptomyces_sp._Mg1.465541,Mycobacterium_kansasii_ATCC_12478.557599,Rhodococcus_sp._B7740.1564114,Gardnerella_vaginalis_ATCC_14019.525284,Bifidobacterium_breve.1685,Myco-<br>bacterium_indicus_pranii_MTCC_9506.1232724,Nocardiopsis_dassonvillei_subsp._dassonvillei_DSM_43111.446468,Th-<br>ermobifida_fusca_YX.269800,Saccharopolyspora_erythraea_NRRL_2338.405948,Rhodococcus_pyridinivorans_SB3094<br>.1435356,Mycobacterium_tuberculosis.1773,Bifidobacterium_longum_subsp._infantis_ATCC_15697_JCM_1222_DSM_20088.391904,Streptomyces_sp._CFMR_7.1649184,Mycobacterium_vanbaalenii_PYR-1.350058,Corynebacterium_uterequi.1072256,Mycobacterium_haemophilum_DSM_44634.1202450,Mycobacterium_neo-<br>aurum_VKM_Ac-1815D.700508,Streptomyces_sp._769.1262452,Kocuria_flava.446860,Kineococcus_radiotolerans_SRS30216_ATCC_BAA-149.266940,Olsenella_sp._oral_taxon_807.712411,Arthrobacter_sp._LS16.1690248,Streptomyces_leeuwenhoekii.1437453,Corynebacterium_glyciniphilum_AJ_3170.1404245,Kytococcus_sedentarius_DSM_20547.478801,Arthrobacter_aure-<br>scens_TC1.290340                                                                                    |
| 3   | Corynebacteriales_bacterium_X1698.1562462,Streptomyces_albulus_ZPM.1434306,Isoptericola_variabilis_225.743718,<br>Bifidobacterium_indicum_LMG_11587_DSM_20214.1341694,Bifidobacterium_adolescentis.1680,Intrasporangium_cal-<br>vum_DSM_43043.710696,Arthrobacter_alpinus.656366,Arthrobacter_sp._IHBB_11108.1618207,Corynebacterium_arge-<br>ntoratense_DSM_44202.1348662,Rathayibacter_toxicus.145458,Streptomyces_sp._SirexAA-E.862751,Mycobacterium_abscessus_subsp._bolletii_50594.1303024,Arthrobacter_arilaitensis.256701,Bifidobacterium_ka-<br>shiwano_hense_JCM_15439_DSM_21854.1150460,Streptomyces_sp._769.1262452,Kribbella_flavida_DSM_17836.479435,Micrococcus_luteus_NCTC_2665.465515,Actinobacteria_bacterium_IMCC26256.1650658,Mycobacterium_afric-<br>anum.33894,Frankia_sp._Ccl3.106370,Corynebacterium_sp._ATCC_6931.1487956,Actinosynnema_mirum_DSM_43827.446462,Actinoplanes_sp._N902-109.649831,Jonesia_denitrificans_DSM_20603.471856,Amycolatopsis_orientalis_HCCB10007.1156913,Corynebacteriu-<br>m_atypicum.191610,Bifidobacterium_thermophilum_RBL67.1254439,Rhodococcus_jostii_RHA1.101510,Rothia_mucilagi-<br>nosa_DY-18.680646,Actinomyces_meyeri.52773,Corynebacterium_camporealeensis.161896,Corynebacterium_variabile_DSM_44702.858619                                                                                                             |
| 4   | Corynebacterium_humireducens_NBRC_106098_DSM_45392.1223515,Clavibacter_michiganensis_subsp._sepedoni-<br>cus.31964,Mycobacterium_rhodesiae_NBB3.710685,Actinomyces_radici-<br>dentis.111015,Mycobacterium_kansasii_ATCC_13127.593907                                                                                                                                                                                                                                                                                                                                                                                                                                                                                                                                                                                                                                                                                                                                                                                                                                                                                                                                                                                                                                                                                                                                                  |

- 12478.557599,Pseudonocardia\_sp.\_AL041005-10.445576,Mycobacterium\_sp.\_VKM\_Ac-1817D.1273687,Corynebacterium\_imitans.156978,Gardnerella\_vaginalis\_ATCC\_14019.525284,Kutzneria\_albida\_DSM\_43870.1449976,Slackia\_heliotrinireducens\_DSM\_20476.471855,Mycobacterium\_fortuitum.1766,Conexibacter\_woesei\_DSM\_14684.469383,Mycobacterium\_sp.\_MCS.164756,Luteipulveratus\_mongoliensis.571913,Eggerthella\_sp.\_YY7918.502558,Frankia\_sp.\_Ccl3.106370,Bifidobacterium\_breve.1685,Corynebacterium\_resistens\_DSM\_45100.662755,Rubrobacter\_radiotolerans.42256,Arthrobacter\_sp.\_FB24.290399,Streptomyces\_globisporus\_C-1027.1172567,Amycolatopsis\_mediterranei\_S699.713604,Rhodococcus\_jostii\_RHA1.101510,Corynebacterium\_glyciniphilum\_AJ\_3170.1404245,Streptomyces\_griseus\_subsp.\_griseus\_NBRC\_13350.455632,Gordonia\_bronchialis\_DSM\_43247.526226,Streptomyces\_cyaneogriseus\_subsp.\_noncyanogenus.477245,Streptomyces\_leeuwenhoekii.1437453,Mycobacterium\_indicus\_pranii\_MTCC\_9506.1232724,Mycobacterium\_liflandii\_128FXT.459424,Arthrobacter\_aurescens\_TC1.290340
- 5 Corynebacterium\_falsenii\_DSM\_44353.1451189,Bifidobacterium\_kashiwanohense\_JCM\_15439\_DSM\_21854.1150460,Nakamurella\_multipartita\_DSM\_44233.479431,Bifidobacterium\_pseudocatenulatum\_DSM\_20438\_JCM\_1200\_LMG\_10505.547043,Salinispora\_arenicola\_CNS-205.391037,Microbacterium\_sp.\_CGR1.1696072,Xylanimonas\_cellulosilytica\_DSM\_15894.446471,Mycobacterium\_sp.\_KMS.189918,Kocuria\_rhizophila\_DC2201.378753,Streptomyces\_scabiei\_87.22.680198,Arthrobacter\_alpinus.656366,Streptomyces\_leeuwenhoekii.1437453,Corynebacterium\_efficiens\_Ys-314.196164,Bifidobacterium\_longum\_subsp.\_infantis\_ATCC\_15697\_JCM\_1222\_DSM\_20088.391904,Frankia\_alni\_ACN14a.326424,Mycobacterium\_bovis\_BCG.33892,Pseudonocardia\_sp.\_EC080619-01.1096856,Frankia\_sp.\_Ccl3.106370,Actinobacteria\_bacterium\_IMCC26256.1650658,Gordonia\_bronchialis\_DSM\_43247.526226,Arthrobacter\_sp.\_LS16.1690248,Arthrobacter\_sp.\_IHBB\_11108.1618207,Bifidobacterium\_actinocoloniiforme\_DSM\_22766.1437605,Gordonia\_polyisoprenivorans\_VH2.1112204,Rhodococcus\_opacus\_PD630.543736,Dermacoccus\_nishinomiyaensis.1274,Corynebacterium\_pseudotuberculosis.1719,Modestobacter\_marinus.477641,Mycobacterium\_tuberculosis.1773,Amycolatopsis\_orientalis\_HCCB10007.1156913,Rathayibacter\_toxicus.145458,Arthrobacter\_sp.\_ERG\_S1\_01.1704044
- 6 Kribbella\_flavida\_DSM\_17836.479435,Corynebacterium\_singulare.161899,Microbacterium\_sp.\_XT11.367477,Mycobacterium\_tuberculosis.1773,Bifidobacterium\_adolescentis.1680,Adlercreutzia\_equilifaciens\_DSM\_19450.1384484,Nocardia\_cyriacigeorgica\_GUH-2.1127134,Arthrobacter\_sp.\_FB24.290399,Kocuria\_flava.446860,Nocardioides\_sp.\_JS614.196162,Mycobacterium\_bovis\_BCG.33892,Gordonia\_sp.\_KTR9.337191,Rhodococcus\_erythropolis\_PR4.234621,Thermobifida\_fusca\_YX.269800,Eggerthella\_lenta\_DSM\_2243.479437,Arthrobacter\_phenanthrenivorans\_Spe3.930171,Arthrobacter\_sp.\_ATCC\_21022.171959,Streptomyces\_vietnamensis.362257,Arthrobacter\_sp.\_Rue61a.1118963,Cellulomonas\_fimi\_ATCC\_484.590998,Truerperella\_pyogenes\_TP8.1435056,Mycobacterium\_microti.1806,Kitasatospora\_setae\_KM-6054.452652,Mycobacterium\_kansasii\_ATCC\_12478.557599,Cryptobacterium\_curtum\_DSM\_15641.469378,Arthrobacter\_sp.\_Hiyo8.1588023,Corynebacterium\_utequei.1072256,Mycobacterium\_sp.\_MOTT36Y.1168287,Arthrobacter\_arilaiteensis.256701,Bifidobacterium\_catenulatum\_DSM\_16992\_JCM\_1194\_LMG\_11043.566552,Arthrobacter\_alpinus.656366,Nocardia\_farcinica.37329
- 7 Corynebacterium\_imitans.156978,Pseudonocardia\_sp.\_HH130629-09.1641402,Corynebacterium\_ulcerans\_FRC58.1408268,Amycolatopsis\_orientalis\_HCCB10007.1156913,Streptomyces\_collinus\_Tu\_365.1214242,Slackia\_heliotrinireducens\_DSM\_20476.471855,Eggerthella\_lenta\_DSM\_2243.479437,Streptomyces\_sp.\_CNQ-509.444103,Amycolatopsis\_lurida\_NRRL\_2430.1460371,Streptomyces\_sp.\_CdTB01.1725411,Bifidobacterium\_thermophilum\_RBL67.1254439,Mycobacterium\_indicus\_pranii\_MTCC\_9506.1232724,Mycobacterium\_ulcerans\_Agy99.362242,Arthrobacter\_sulfonivorans.121292,Corynebacteriales\_bacterium\_X1698.1562462,Arthrobacter\_sp.\_FB24.290399,Streptomyces\_sp.\_Mg1.465541,Rhodococcus\_erythropolis\_PR4.234621,Frankia\_sp.\_EAN1pec.298653,Corynebacterium\_mariis\_DSM\_45190.1224163,Corynebacterium\_mustelae.571915,Corynebacterium\_aurimucosum\_ATCC\_700975.548476,Mycobacterium\_microti.1806,Tropheryma\_whipplei\_str.\_Twist.203267,Streptomyces\_leeuwenhoekii.1437453,Thermobifida\_fusca\_YX.269800,Intrasporangium\_calvum\_DSM\_43043.710696,Salinispora\_tropica\_CNB-440.369723,Mycobacterium\_fortuitum.1766,Amycolatopsis\_mediterranei\_S699.713604,Arthrobacter\_sp.\_Rue61a.1118963,Bifidobacterium\_scardovii\_JCM\_12489\_DSM\_13734.1150461
- 8 Mycobacterium\_gilvum\_PYR-GCK.350054,Bifidobacterium\_indicum\_LMG\_11587\_DSM\_20214.1341694,Amycolaticoccus\_subflavus\_DQS3-9A1.443218,Arthrobacter\_sp.\_Hiyo8.1588023,Arthrobacter\_phenanthrenivorans\_Spe3.930171,Nocardia\_opsis\_dassonvillei\_subsp.\_dassonvillei\_DSM\_43111.446468,Actinomyces\_sp.\_oral\_taxon\_414.712122,Sanguibacter\_keddiei\_DSM\_10542.446469,Cellulomonas\_gilvus\_ATCC\_13127.593907,Pseudonocardia\_sp.\_AL041005-10.445576,Streptomyces\_griseus\_subsp.\_griseus\_NBRC\_13350.455632,Corynebacterium\_imitans.156978,Corynebacterium\_deserti\_GIMN1.010.931089,Kocuria\_rhizophila\_DC2201.378753,Corynebacterium\_ureicelivorans.401472,Arthrobacter\_sp.\_YC-RL1.1652545,Arthrobacter\_sp.\_LS16.1690248,Corynebacterium\_variabile\_DSM\_44702.858619,Mycobacterium\_abscessus\_subsp.\_bolletii\_50594.1303024,Mycobacterium\_intracellulare\_MOTT-64.1138383,Streptomyces\_leeuwenhoekii.1437453,Bifidobacterium\_bifidum.1681,Corynebacterium\_aurimucosum\_ATCC\_700975.548476,Microbacterium\_sp.\_XT11.367477,Luteipulveratus\_mongoliensis.571913,Frankia\_sp.\_Eul1c.298654,

Actinosynnema\_mirum\_DSM\_43827.446462,Propionibacterium\_propionicum\_F0230a.767029,Saccharothrix\_espanaensis\_DSM\_44229.1179773,Geodermatophilus\_obscurus\_DSM\_43160.526225,Corynebacterium\_vitaeruminis\_DSM\_20294.1224164,Cellulomonas\_fimi\_ATCC\_484.590998

- 9 Leifsonia\_xyli\_subsp.\_cynodontis\_DSM\_46306.1389489,Cellulomonas\_flavigena\_DSM\_20109.446466,Arthrobacter\_sp.\_Hiyo8.1588023,Microlunatus\_phosphovorus\_NM-1.1032480,Streptomyces\_reticuli.1926,Propionibacterium\_avidum\_44067.1170318,Kocuria\_rhizophila\_DC2201.378753,Amycolaticoccus\_subflavus\_DQS3-9A1.443218,Kibdelosporangium\_phytohabitans.860235,Actinoplanes\_friuliensis\_DSM\_7358.1246995,Atopobium\_parvulum\_DSM\_20469.521095,Salinispora\_tropica\_CNB-440.369723,Kitasatospora\_setae\_KM-6054.452652,Corynebacterium\_glyciniphilum\_AJ\_3170.1404245,Microbacterium\_sp.\_CGR1.1696072,Amycolatopsis\_mediterranei\_S699.713604,Rubrobacter\_radiotolerans.42256,Corynebacterium\_kutscheri.35755,Dermaecoccus\_nishinomiyaensis.1274,Streptomyces\_griseus\_subsp.\_griseus\_NBRC\_13350.455632,Mycobacterium\_yongonense\_05-1390.1138871,Bifidobacterium\_longum\_subsp.\_infantis\_ATCC\_15697\_\_\_JCM\_1222\_\_\_DSM\_20088.391904,Pseudonocardia\_sp.\_EC080619-01.1096856,Streptomyces\_collinus\_Tu\_365.1214242,Corynebacterium\_halotolerans\_YIM\_70093\_\_\_DSM\_44683.1121362,Olsenella\_uli\_DSM\_7084.633147,Corynebacterium\_imitans.156978,Corynebacterium\_kroppenstedtii\_DSM\_44385.645127,Frankia\_alni\_ACN14a.326424,Streptomyces\_pristinaespiralis.38300,Nocardiopsis\_alba\_ATCC\_BAA-2165.1205910,Actinomyces\_radiciensis.111015
- 10 Propionibacterium\_freudenreichii\_subsp.\_shermanii\_CIRM-BIA1.754252,Coriobacterium\_glomerans\_PW2.700015,Mycobacterium\_yongonense\_05-1390.1138871,Arthrobacter\_sp.\_ATCC\_21022.1771959,Corynebacteriales\_bacterium\_X1036.1528099,Corynebacterium\_camporealensis.161896,Brevibacterium\_flavum.92706,Ilumatobacter\_coccineus\_YM16-304.1313172,Mycobacterium\_sp.\_JLS.164757,Bifidobacterium\_coryneforme.1687,Catenulispora\_acidiphila\_DSM\_44928.479433,Pseudonocardia\_sp.\_EC080625-04.1096868,Streptomyces\_vietnamensis.362257,Brachybacterium\_faecium\_DSM\_4810.446465,Nocardiopsis\_alba\_ATCC\_BAA-2165.1205910,Corynebacteriales\_bacterium\_X1698.1562462,Dermaecoccus\_nishinomiyaensis.1274,Mycobacterium\_aviu\_104.243243,Mycobacterium\_marinum\_M.216594,Cellulomonas\_gilvus\_ATCC\_13127.593907,Corynebacterium\_statonis.1705,Rhodococcus\_sp.\_B7740.1564114,Corynebacterium\_lactis\_RW2-5.1408189,Arthrobacter\_chlorophenolicus\_A6.452863,Mycobacterium\_liflandii\_128FXT.459424,Actinomyces\_radiciensis.111015,Corynebacterium\_variabile\_DSM\_44702.858619,Mycobacterium\_indicus\_pranii\_MTCC\_9506.1232724,Bifidobacterium\_pseudolongum\_PV8-2.1447715,Microbacterium\_sp.\_PAMC\_28756.1795053,Conexibacter\_woesei\_DSM\_14684.469383,Corynebacterium\_mustelae.571915
- 11 Corynebacterium\_casei\_LMG\_S-19264.1285583,Corynebacterium\_ureicelerivorans.401472,Mycobacterium\_africanum.33894,Mycobacterium\_kansasii\_ATCC\_12478.557599,Acidothermus\_cellulolyticus\_11B.351607,Brevibacterium\_flavum.92706,Sanguibacter\_keddiei\_DSM\_10542.446469,Corynebacterium\_kutscheri.35755,Tsukamurella\_paurometabola\_DSM\_20162.521096,Microbacterium\_sp.\_No\_7.1714373,Streptomyces\_bingchenggensis\_BCW-1.749414,Bifidobacterium\_pseudocatenulatum\_DSM\_20438\_\_\_JCM\_1200\_\_\_LMG\_10505.547043,Amycolatopsis\_orientalis\_HCCB10007.1156913,Kibdelosporangium\_phytohabitans.860235,Mycobacterium\_haemophilum\_DSM\_44634.1202450,Microbacterium\_sp.\_XT11.367477,Gordonia\_sp.\_KTR9.337191,Conexibacter\_woesei\_DSM\_14684.469383,Frankia\_sp.\_Ccl3.106370,Aeromicrobium\_erythreum.2041,Renibacterium\_salmoninarum\_ATCC\_33209.288705,Actinosynnema\_mirum\_DSM\_43827.446462,Streptomyces\_reticuli.1926,Streptomyces\_hygroscopicus\_subsp.\_jinggangensis\_5008.1133850,Mycobacterium\_tuberculosis.1773,Bifidobacterium\_dentium\_JCM\_1195\_\_\_DSM\_20436.1150423,Mycobacterium\_sp.\_EPA45.1545728,Arthrobacter\_sulfonivorans.121292,Segniliparus\_rotundus\_DSM\_44985.640132,Corynebacterium\_efficiens\_YS-314.196164,Corynebacterium\_argentoratense\_DSM\_44202.1348662,Stackebrandtia\_nassauensis\_DSM\_44728.446470
- 12 Mycobacterium\_indicus\_pranii\_MTCC\_9506.1232724,Mycobacterium\_africanum.33894,Corynebacterium\_atypicum.191610,Streptomyces\_cattlea\_NRRL\_8057\_\_\_DSM\_46488.1003195,Streptomyces\_sp.\_CNQ-509.444103,Salinispora\_arenicola\_CNS-205.391037,Gordonia\_bronchialis\_DSM\_43247.526226,Micrococcus\_luteus\_NCTC\_2665.465515,Bifidobacterium\_coryneforme.1687,Gordonia\_polyisoprenivorans\_VH2.1112204,Nocardia\_farcinica.37329,Gordonia\_sp.\_QH-11.1136941,Corynebacterium\_glutamicum\_R.340322,Streptomyces\_venezuelae.54571,Amycolatopsis\_lurida\_NRRL\_2430.1460371,Corynebacterium\_stationis.1705,Rothia\_mucilaginosa\_DY-18.680646,Arthrobacter\_sp.\_PAMC25486.1494608,Bifidobacterium\_longum\_subsp.\_infantis\_ATCC\_15697\_\_\_JCM\_1222\_\_\_DSM\_20088.391904,Pseudonocardia\_sp.\_EC080625-04.1096868,Mycobacterium\_liflandii\_128FXT.459424,Mycobacterium\_testaceum\_StLB037.979556,Gardnerella\_vaginalis\_ATCC\_14019.525284,Mycobacterium\_sp.\_VKM\_Ac-1817D.1273687,Streptomyces\_reticuli.1926,Rhodococcus\_sp.\_B7740.1564114,Renibacterium\_salmoninarum\_ATCC\_3

3209.288705,Arthrobacter\_sp.\_Hiyo8.1588023,Corynebacterium\_kutscheri.35755,Scardovia\_inopinata\_JCM\_12537.1150468,Corynebacterium\_vitaeruminis\_DSM\_20294.1224164,Slackia\_heliotrinireducens\_DSM\_20476.471855

- 13 Microbacterium\_testaceum\_StLB037.979556,Kocuria\_rhizophila\_DC2201.378753,Streptomyces\_pratensis\_ATCC\_3333.1.591167,Pseudonocardia\_dioxanivorans\_CB1190.675635,Olsenella\_uli\_DSM\_7084.633147,Streptomyces\_vietnamensis.362257,Kibdelosporangium\_phytohabitans.860235,Jonesia\_denitrificans\_DSM\_20603.471856,Corynebacterium\_epidermidicantis.1050174,Corynebacterium\_aurimucosum\_ATCC\_700975.548476,Streptomyces\_albulus\_ZPM.1434306,Kocuria\_flava.446860,Leifsonia\_xyli\_subsp.\_cynodontis\_DSM\_46306.1389489,Corynebacterium\_uteriquei.1072256,Arthrobacter\_sp.\_FB24.290399,Sanguibacter\_keddiei\_DSM\_10542.446469,Mycobacterium\_tuberculosis.1773,Segniliparus\_rotundus\_DSM\_44985.640132,Streptomyces\_violaceusniger\_Tu\_4113.653045,Bifidobacterium\_asteroides\_PRL2011.1147128,Streptomyces\_cattleya\_NRRL\_8057\_DSM\_46488.1003195,Arthrobacter\_sp.\_A3.595593,Streptomyces\_sp.\_CNQ-509.444103,Olsenella\_sp.\_oral\_taxon\_807.712411,Illumatobacter\_coccineus\_YM16-304.1313172,Stackebrandtia\_nassauensis\_DSM\_44728.446470,Mycobacterium\_chubuense\_NBB4.710421,Streptomyces\_glaucescens.1907,Isoptricicola\_variabilis\_225.743718,Mycobacterium\_intracellulare\_MOTT-64.1138383,Corynebacterium\_atypicum.191610,Geodermatophilus\_obscurus\_DSM\_43160.526225
- 14 Corynebacterium\_marinum\_DSM\_44953.1224162,Mycobacterium\_ulcerans\_Agy99.362242,Corynebacterium\_atypicum.191610,Arthrobacter\_sp.\_Hiyo8.1588023,Streptomyces\_sp.\_PAMC26508.1265601,Streptomyces\_hygroscopicus\_subsp.\_jinggangensis\_5008.1133850,Nocardioides\_sp.\_JS614.196162,Amycolatopsis\_mediterranei\_S699.713604,Sanguibacter\_keddiei\_DSM\_10542.446469,Rhodoluna\_lacicola.529884,Bifidobacterium\_actinocoloniiforme\_DSM\_22766.1437605,Saccharopolyspora\_erythraea\_NRRL\_2338.405948,Mycobacterium\_abscessus\_subsp.\_bolletii\_50594.1303024,Mycobacterium\_leprae\_Br4923.561304,Mycobacterium\_testaceum\_StLB037.979556,Bifidobacterium\_pseudocatenulatum\_DSM\_20438\_JCM\_1200\_LMG\_10505.547043,Leifsonia\_xyli\_subsp.\_cynodontis\_DSM\_46306.1389489,Brachybacterium\_faecium\_DSM\_4810.446465,Thermobifida\_fusca\_YX.269800,Bifidobacterium\_scardovii\_JCM\_12489\_DSM\_13734.1150461,Bifidobacterium\_thermophilum\_RBL67.1254439,Actinomyces\_meyeri.52773,Propionibacterium\_acnes\_C1.1234380,Corynebacterium\_argentoratense\_DSM\_44202.1348662,Beutenbergia\_cavernae\_DSM\_12333.471853,Rhodococcus\_sp.\_B7740.1564114,Arsenicicoccus\_sp.\_oral\_taxon\_190.1658671,Salinispora\_arenicola\_CNS-205.391037,Modestobacter\_marinus.477641,Frankia\_sp.\_EAN1pec.298653,Arthrobacter\_alpinus.656366,Bifidobacterium\_dentium\_JCM\_1195\_DSM\_20436.1150423
- 15 Nakamurella\_multipartita\_DSM\_44233.479431,Corynebacterium\_marinum\_DSM\_44953.1224162,Rubrobacter\_radiotolerans.42256,Streptomyces\_sp.\_4F.1751294,Arthrobacter\_sp.\_A3.595593,Cryptobacterium\_curtum\_DSM\_15641.469378,Actinoplanes\_sp.\_SE50\_110.134676,Pseudonocardia\_sp.\_HH130629-09.1641402,Mycobacterium\_sp.\_JLS.164757,Mycobacterium\_haemophilum\_DSM\_44634.1202450,Arthrobacter\_arilaiteensis.256701,Kineococcus\_radiotolerans\_SRS30216\_ATCC\_BAA-149.266940,Corynebacterium\_terpenetabidum\_Y-11.1200352,Streptomyces\_violaceusniger\_Tu\_4113.653045,Mycobacterium\_gilvum\_PYR-GCK.350054,Mycobacterium\_goodii.134601,Bifidobacterium\_scardovii\_JCM\_12489\_DSM\_13734.1150461,Streptomyces\_orangium\_roseum\_DSM\_43021.479432,Streptomyces\_cattleya\_NRRL\_8057\_DSM\_46488.1003195,Cellulomonas\_fla-vigena\_DSM\_20109.446466,Rhodococcus\_pyridinivorans\_SB3094.1435356,Arthrobacter\_aurescens\_TC1.290340,Tsukamurella\_paurometabola\_DSM\_20162.521096,Coriobacterium\_glomerans\_PW2.700015,Streptomyces\_ambotaciensis\_ATCC\_23877.278992,Mycobacterium\_kansasii\_ATCC\_12478.557599,Streptomyces\_sp.\_PAMC26508.1265601,Saccharothrix\_espansensis\_DSM\_44229.1179773,Arthrobacter\_sp.\_FB24.290399,Corynebacterium\_pseudotuberculosis.1719,Jonesia\_denitrificans\_DSM\_20603.471856,Arthrobacter\_sp.\_ERGS1\_01.1704044
- 16 Mycobacterium\_marinum\_M.216594,Mycobacterium\_avium\_104.243243,Mycobacterium\_intracellulare\_MOTT-64.1138383,Arthrobacter\_aurescens\_TC1.290340,Microlunatus\_phosphovorus\_NM-1.1032480,Mycobacterium\_bovis\_BCG.33892,Actinotignum\_schaalii.59505,Amycolatopsis\_methanolica\_239.1068978,Rubrobacter\_radiotolerans.42256,Mycobacterium\_chubuense\_NBB4.710421,Mycobacterium\_sp.\_VKM\_Ac-1817D.1273687,Microterricola\_viridarii.412690,Rhodococcus\_pyridinivorans\_SB3094.1435356,Nocardia\_nova\_SH22a.1415166,Scardovia\_inopinata\_JCM\_12537.1150468,Streptomyces\_venezuelae.54571,Verrucosipora\_maris\_AB-18-032.263358,Cellulomonas\_fimi\_ATCC\_484.590998,Corynebacterium\_glyciniphilum\_AJ\_3170.1404245,Modestobacter\_marinus.477641,Beutenbergia\_cavernae\_DSM\_12333.471853,Corynebacterium\_halotolerans\_YIM\_70093\_DSM\_44683.1121362,Nocardioides\_sp.\_JS614.196162,Corynebacterium\_ureicelerivorans.401472,Streptomyces\_sp.\_4F.1751294,Pseudonocardia\_sp.\_AL041005-10.445576,Streptomyces\_glaucescens.1907,Micromonospora\_sp.\_L5.648999,Actinobacteria\_bacterium\_IMCC26256.1650658,Intrasporangium\_calvum\_DSM\_43043.710696,Pseudonocardia\_sp.\_HH130629-09.1641402,Streptomyces\_sp.\_Mg1.465541
- 17 Mycobacterium\_rhodesiae\_NBB3.710685,Bifidobacterium\_kashiwanohense\_JCM\_15439\_DSM\_21854.1150460,Frankia\_sp.\_Eu1c.298654,Mycobacterium\_marinum\_M.216594,Pseudonocardia\_sp.\_AL041005-10.445576,Mycobacterium\_sp.\_MCS.164756,Mycobacterium\_avium\_104.243243,Streptomyces\_sp.\_Mg1.465541,Propionibacterium\_freudenreichii\_subsp.\_shermanii\_CIRM-BIA1.754252,Corynebacterium\_maris\_DSM\_45190.1224163,Arcanobacterium\_haemolyticum\_DSM\_20595.644284,Thermobispora\_bispora\_DSM\_43833.469371,Arthrobacter\_arilaiteensis.256701,Nakamurella\_multipartita\_DSM\_44233.479431,Mycobacterium\_chubuense\_NBB4.710421,Rhodoluna\_lacicola.529884,Arthrobacter\_sp.\_YC-RL1.1652545,Micromonospora\_aurantiaca\_ATCC\_27029.644283,Corynebacterium\_glyciniphilum\_AJ\_3170.1404245,Ki

neococcus\_radiotolerans\_SRS30216\_\_\_\_ATCC\_BAA-  
 149.266940,Rubrobacter\_xylanophilus\_DSM\_9941.266117,Atopobium\_parvulum\_DSM\_20469.521095,Corynebacterium\_atypicum.191610,Pseudonocardia\_dioxanivorans\_CB1190.675635,Gardnerella\_vaginalis\_ATCC\_14019.525284,Mycobacterium\_gilvum\_PYR-  
 GCK.350054,Adlercreutzia\_equolifaciens\_DSM\_19450.1384484,Kutzneria\_albida\_DSM\_43870.1449976,Micromonospora\_sp.\_L5.648999,Streptomyces\_sp.\_CdTB01.1725411,Mycobacterium\_abscessus\_subsp.\_bolletii\_50594.1303024,Mycobacterium\_sp.\_JS623.212767

- 18 Mycobacterium\_gilvum\_PYR-  
 GCK.350054,Saccharothrix\_espanaensis\_DSM\_44229.1179773,Nocardioides\_sp.\_JS614.196162,Luteipulveratus\_mon  
 goliensis.571913,Propionibacterium\_freudenreichii\_subsp.\_shermanii\_CIRM-  
 BIA1.754252,Corynebacterium\_lactis\_RW2-5.1408189,Frankia\_alni\_ACN14a.326424,Verrucosispora\_maris\_AB-18-  
 032.263358,Saccharomonospora\_viridis\_DSM\_43017.471857,Corynebacterium\_stationis.1705,Corynebacterium\_testudi  
 noris.136857,Micromonospora\_aurantiaca\_ATCC\_27029.644283,Blastococcus\_saxobsidens\_DD2.1146883,Streptomyces\_lydicus\_A02.1403539,Kocuria\_palustris.71999,Bifidobacterium\_breve.1685,Arthrobacter\_sp.\_LS16.1690248,Mycobacterium\_leprae\_Br4923.561304,Nocardia\_cyriacigeorgica\_GUH-2.1127134,Mycobacterium\_yongonense\_05-  
 1390.1138871,Corynebacterium\_mustelae.571915,Arthrobacter\_alpinus.656366,Corynebacterium\_kutscheri.35755,Micr  
 obacterium\_testaceum\_StLB037.979556,Bifidobacterium\_kashiwanohense\_JCM\_15439\_\_\_\_DSM\_21854.1150460,Xylani  
 monas\_cellulosilytica\_DSM\_15894.446471,Microterricola\_viridarii.412690,Pimelobacter\_simplex.2045,Kineococcus\_radi  
 otolerans\_SRS30216\_\_\_\_ATCC\_BAA-  
 149.266940,Mycobacterium\_indicus\_pranii\_MTCC\_9506.1232724,Arthrobacter\_arilaitensis.256701,Amycolatopsis\_meth  
 anolica\_239.1068978
- 19 Rhodoluna\_lacicola.529884,Scardovia\_inopinata\_JCM\_12537.1150468,Isopterocola\_variabilis\_225.743718,Sanguibacter\_keddiei\_DSM\_10542.446469,Nocardia\_nova\_SH22a.1415166,Kutzneria\_albida\_DSM\_43870.1449976,Nakamurella\_multipartita\_DSM\_44233.479431,Corynebacterium\_camporealensis.161896,Streptomyces\_ambofaciens\_ATCC\_23877.278992,Rothia\_mucilaginoso\_DY-  
 18.680646,Clavibacter\_michiganensis\_subsp.\_sepedonicus.31964,Microbacterium\_sp.\_CGR1.1696072,Aeromicrobium\_erythreum.2041,Corynebacteriales\_bacterium\_X1698.1562462,Actinoplanes\_friuliensis\_DSM\_7358.1246995,Mycobacterium\_sp.\_JS623.212767,Corynebacterium\_glutamicum\_R.340322,Jonesia\_denitrificans\_DSM\_20603.471856,Rubrobacter\_xylanophilus\_DSM\_9941.266117,Streptomyces\_scabiei\_87.22.680198,Streptosporangium\_roseum\_DSM\_43021.479432,Atopobium\_parvulum\_DSM\_20469.521095,Rhodococcus\_pyridinivorans\_SB3094.1435356,Corynebacterium\_humireducens\_NBRC\_106098\_\_\_\_DSM\_45392.1223515,Streptomyces\_collinus\_Tu\_365.1214242,Renibacterium\_salmoninarum\_ATCC\_33209.288705,Salinispora\_arenicola\_CNS-  
 205.391037,Nocardia\_brasiliensis\_ATCC\_700358.1133849,Olsenella\_sp.\_oral\_taxon\_807.712411,Corynebacterium\_de  
 serti\_GIMN1.010.931089,Mycobacterium\_kansasii\_ATCC\_12478.557599,Frankia\_sp.\_EAN1pec.298653

17

18

19 **Table S26** List of 86 Actinobacteria (ACT) species kept for 20 permutations under MID86 random sampling scenarios (RSS).

RSS species kept

- 0 Streptomyces\_sp.\_CdTB01.1725411, Microbacterium\_testaceum\_StLB037.979556, Coriobacteriaceae\_bacterium\_68-1-3.1531429, Streptomyces\_avermitilis\_MA-4680\_\_NBRC\_14893.227882, Arcanobacterium\_haemolyticum\_DSM\_20595.644284, Tropheryma\_whipplei\_str.\_Twist.203267, Bifidobacterium\_longum\_subsp.\_infantis\_ATCC\_15697\_\_JCM\_1222\_\_DSM\_20088.391904, Mycobacterium\_marinum\_M.216594, Mycobacterium\_microti.1806, Microterricola\_viridarii.412690, Actinosynnema\_mirum\_DSM\_43827.446462, Bifidobacterium\_scardovii\_JCM\_12489\_\_DSM\_13734.1150461, Mycobacterium\_yongonense\_05-1390.1138871, Acidimicrobium\_ferroxidans\_DSM\_10331.525909, Streptomyces\_cattleia\_NRRL\_8057\_\_DSM\_46488.1003195, Pseudonocardia\_sp.\_AL041005-10.445576, Propionibacterium\_freudenreichii\_subsp.\_shermanii\_CIRM-BIA1.754252, Thermobifida\_fusca\_YX.269800, Corynebacterium\_urealyticum\_DSM\_7109.504474, Nakamurella\_multipartita\_DSM\_44233.479431, Bifidobacterium\_angulatum\_DSM\_20098\_\_JCM\_7096.518635, Amycolatopsis\_methanolica\_239.1068978, Corynebacterium\_singulare.161899, Actinoplanes\_sp.\_N902-109.649831, Streptomyces\_globisporus\_C-1027.1172567, Kocuria\_palustris.71999, Pseudonocardia\_dioxanivorans\_CB1190.675635, Mycobacterium\_indicus\_pranii\_MTCC\_9506.1232724, Rhodococcus\_opacus\_PD630.543736, Amycolatopsis\_japonica.208439, Corynebacterium\_maris\_DSM\_45190.1224163, Mycobacterium\_aviium\_104.243243, Corynebacterium\_kutscheri.35755, Kocuria\_rhizophila\_DC2201.378753, Mycobacterium\_tuberculosis.1773, Kibdelosporangium\_phytohabitans.860235, Streptomyces\_sp.\_PAMC26508.1265601, Propionibacterium\_propionicum\_F0230a.767029, Mycobacterium\_sinense.875328, Gordonia\_sp.\_QH-11.1136941, Arthrobacter\_sp.\_ATCC\_21022.1771959, Microbacterium\_sp.\_PAMC\_28756.1795053, Arthrobacter\_chlorophenolicus\_A6.452863, Beutenbergia\_cavernae\_DSM\_12333.471853, Xylanimonas\_cellulosilytica\_DSM\_15894.446471, Streptomyces\_violaceusniger\_Tu\_4113.653045, Acidothermus\_cellulolyticus\_11B.351607, Actinoplanes\_sp.\_SE50\_110.134676, Streptomyces\_hygroscopicus\_subsp.\_jinggangensis\_5008.1133850, Actinoplanes\_friuliensis\_DSM\_7358.1246995, Devriesea\_agamarum.472569, Mycobacterium\_africanum.33894, Bifidobacterium\_catenulatum\_DSM\_16992\_\_JCM\_1194\_\_LMG\_11043.566552, Propionibacterium\_acidipropionici\_ATCC\_4875.1171373, Microlunatus\_phosphovorus\_NM-1.1032480, Microbacterium\_sp.\_CGR1.1696072, Nocardiopsis\_dassonvillei\_subsp.\_dassonvillei\_DSM\_43111.446468, Streptomyces\_pratensis\_ATCC\_33331.591167, Streptomyces\_pristinaespiralis.38300, Rhodoluna\_lacicola.529884, Mobiluncus\_curtisii\_ATCC\_43063.548479, Micrococcus\_luteus\_NCTC\_2665.465515, Nocardioides\_sp.\_JS614.196162, Arthrobacter\_sulfonivorans.121292, Corynebacterium\_pseudotuberculosis.1719, Actinoplanes\_missouriensis\_431.512565, Corynebacterium\_kropfenstedtii\_DSM\_44385.645127, Rubrobacter\_xylanophilus\_DSM\_9941.266117, Nocardiopsis\_alba\_ATCC\_BAA-2165.1205910, Gordonia\_sp.\_KTR9.337191, Luteipulveratus\_mongoliensis.571913, Corynebacterium\_testudinoris.136857, Mycobacterium\_sp.\_MOTT36Y.1168287, Gordonia\_polyisoprenivorans\_VH2.1112204, Arthrobacter\_phenanthrenivorans\_Sph\_e3.930171, Atopobium\_parvulum\_DSM\_20469.521095, Mycobacterium\_ulcerans\_Agy99.362242, Streptomyces\_sp.\_Mg1.465541, Thermomonospora\_curvata\_DSM\_43183.471852, Corynebacterium\_resistens\_DSM\_45100.662755, Arthrobacter\_sp.\_FB24.290399, Arthrobacter\_sp.\_Hiyo8.1588023, Mycobacterium\_sp.\_MCS.164756, Bifidobacterium\_animalis\_subsp.\_lactis\_CNCM\_J-2494.1042403, Streptomyces\_fulvissimus\_DSM\_40593.1303692, Bifidobacterium\_asteroides\_PRL2011.1147128
- 1 Streptomyces\_albulus\_ZPM.1434306, Corynebacterium\_stationis.1705, Arthrobacter\_sp.\_Hiyo8.1588023, Atopobium\_parvulum\_DSM\_20469.521095, Mycobacterium\_aviium\_104.243243, Corynebacterium\_camporealensis.161896, Pimelobacter\_simplix.2045, Eggerthella\_lenta\_DSM\_2243.479437, Bifidobacterium\_actinocoloniiforme\_DSM\_22766.1437605, Amycolatopsis\_japonica.208439, Mycobacterium\_sp.\_JS623.212767, Arthrobacter\_arilaitensis.256701, Mycobacterium\_sinense.875328, Bifidobacterium\_kashiwanohense\_JCM\_15439\_\_DSM\_21854.1150460, Corynebacterium\_variabile\_DSM\_44702.858619, Corynebacterium\_testudinoris.136857, Pseudonocardia\_sp.\_EC080610-09.1688404, Thermobispora\_bispora\_DSM\_43833.469371, Gordonia\_bronchialis\_DSM\_43247.526226, Mobiluncus\_curtisii\_ATCC\_43063.548479, Mycobacterium\_sp.\_KMS.189918, Coriobacteriaceae\_bacterium\_68-1-3.1531429, Bifidobacterium\_catenulatum\_DSM\_16992\_\_JCM\_1194\_\_LMG\_11043.566552, Actinoplanes\_sp.\_N902-109.649831, Arthrobacter\_alpinus.656366, Streptomyces\_avermitilis\_MA-4680\_\_NBRC\_14893.227882, Dermacoccus\_nishinomiyaensis.1274, Corynebacterium\_glutamicum\_R.340322, Propionibacterium\_acidipropionici\_ATCC\_4875.1171373, Corynebacterium\_ureicelerivorans.401472, Isosporicola\_variabilis\_225.743718, Streptomyces\_bingchenggensis\_BCW-1.749414, Mycobacterium\_neoaurum\_VKM\_Ac-1815D.700508, Streptomyces\_pratensis\_ATCC\_33331.591167, Cellulomonas\_gilvus\_ATCC\_13127.593907, Rubrobacter\_xylanophilus\_DSM\_9941.266117, Tropheryma\_whipplei\_str.\_Twist.203267, Bifidobacterium\_asteroides\_PRL2011.1147128, Mycobacterium\_microti.1806, Micromonospora\_aurantiaca\_ATCC\_27029.644283, Tsukamurella\_paurometabola\_DSM\_20162.521096, Propionibacterium\_avidum\_44067.1170318, Streptomyces\_venezuelae.54571, Corynebacterium\_glyciniphilum\_AJ\_3170.1404245, Microlunatus\_phosphovorus\_NM-1.1032480, Mycobacterium\_bovis\_BCG.33892, Pseudonocardia\_sp.\_HH130629-09.1641402, Arthrobacter\_sp.\_A3.595593, Cellulomonas\_flavigena\_DSM\_20109.446466, Streptomyces\_cattleia\_NRRL\_8057\_\_DSM\_46488.1003195, Propionibacterium\_propionicum\_F0230a.767029, Arthrobacter\_aurescens\_TC1.290340, Corynebacterium\_imitans.156978, Streptomyces\_leeuwenhoekii.1437453, Streptomyces\_cyaneogriseus\_subsp.\_noncyanogenus.477245, Cryptobacterium\_curtum\_DSM\_15641.469378, Mycobacterium\_sp.\_MOTT36Y.1168287, Actinomyces\_sp.\_oral\_taxon\_414.712122, Corynebacterium\_utequei.1072256, Streptomyces\_glaucescens.1907, Frankia\_sp.\_EAN1pec.298653, Frankia\_symbiont\_of\_Datisca\_glomerata.656024, Streptomyces\_sp.\_CNQ-509.444103, Microbacterium\_sp.\_CGR1.1696072, Arthrobacter\_sp.\_ERGS1\_01.1704044, Corynebacterium\_argentoratense\_DSM\_44202.1348662, Micromonospora\_sp.\_L5.648999, Streptomyces\_scabiei\_87.22.680198, Mycobacterium\_rhodesiae\_N

BB3.710685, *Corynebacterium*\_sp.\_ATCC\_6931.1487956, *Bifidobacterium\_pseudolongum\_PV8-*  
 2.1447715, *Nocardiopsis\_dassonvillei\_subsp.\_dassonvillei\_DSM\_43111.446468*, *Mycobacterium\_africanum.33894*, *Kutzneria*  
*\_albida\_DSM\_43870.1449976*, *Streptomyces\_griseus\_subsp.\_griseus\_NBRC\_13350.455632*, *Olsenella\_uli\_DSM\_7084.633*  
 147, *Saccharothrix\_espanaensis\_DSM\_44229.1179773*, *Mycobacterium\_gilvum\_PYR-*  
 GCK.350054, *Mycobacterium\_leprae\_Br4923.561304*, *Corynebacterium\_deserti\_GIMN1.010.931089*, *Intrasporangium\_calvu*  
*m\_DSM\_43043.710696*, *Scardovia\_inopinata\_JCM\_12537.1150468*, *Corynebacterium\_halotolerans\_YIM\_70093\_DSM\_44*  
 683.1121362, *Beutenbergia\_cavernae\_DSM\_12333.471853*, *Streptomyces\_collinus\_Tu\_365.1214242*, *Streptomyces\_ambofa*  
*ciens\_ATCC\_23877.278992*

- 2 *Rhodoluna\_lacicola.529884*, *Microbacterium\_sp.\_XT11.367477*, *Olsenella\_sp.\_oral\_taxon\_807.712411*, *Trueperella\_pyogene*  
*s\_TP8.1435056*, *Mycobacterium\_neoaurum\_VKM\_Ac-1815D.700508*, *Microlunatus\_phosphovorans\_NM-*  
*1.1032480*, *Cellulomonas\_gilvus\_ATCC\_13127.593907*, *Arthrobacter\_sulfonivorans.121292*, *Bifidobacterium\_angulatum\_DS*  
*M\_20098\_JCM\_7096.518635*, *Streptomyces\_leeuwenhoekii.1437453*, *Amycolatopsis\_japonica.208439*, *Arthrobacter\_sp.\_*  
*A3.595593*, *Olsenella\_uli\_DSM\_7084.633147*, *Streptomyces\_venezuelae.54571*, *Streptomyces\_pratensis\_ATCC\_33331.591*  
*167*, *Mycobacterium\_sinense.875328*, *Corynebacterium\_callunae\_DSM\_20147.1121353*, *Bifidobacterium\_breve.1685*, *Arthrob*  
*acter\_sp.\_ERGS1\_01.1704044*, *Streptomyces\_sp.\_CdTB01.1725411*, *Streptomyces\_avermitilis\_MA-*  
*4680\_NBRC\_14893.227882*, *Bifidobacterium\_bifidum.1681*, *Xylanimonas\_cellulosilytica\_DSM\_15894.446471*, *Arsenicicocc*  
*us\_sp.\_oral\_taxon\_190.1658671*, *Mycobacterium\_sp.\_JS623.212767*, *Mycobacterium\_leprae\_Br4923.561304*, *Geodermatop*  
*hilus\_obscurus\_DSM\_43160.526225*, *Mycobacterium\_sp.\_KMS.189918*, *Scardovia\_inopinata\_JCM\_12537.1150468*, *Actinopl*  
*anes\_friuliensis\_DSM\_7358.1246995*, *Corynebacterium\_kroppenstedtii\_DSM\_44385.645127*, *Streptomyces\_violaceusniger\_Tu\_4113.653045*, *Streptomyces\_lydicus\_A02.1403539*, *Corynebacterium\_imitans.156978*, *Pseudonocardia\_sp.\_AL041005-*  
*10.445576*, *Streptomyces\_sp.\_CNQ-*  
*509.444103*, *Dermacoccus\_nishinomiyaensis.1274*, *Corynebacterium\_glyciniphilum\_AJ\_3170.1404245*, *Streptomyces\_fulvis*  
*mus\_DSM\_40593.1303692*, *Propionibacterium\_acnes\_C1.1234380*, *Microbacterium\_testaceum\_StLB037.979556*, *Arthrobact*  
*er\_sp.\_PAMC25486.1494608*, *Coriobacteriaceae\_bacterium\_68-1-*  
*3.1531429*, *Corynebacterium\_variabile\_DSM\_44702.858619*, *Mycobacterium\_sp.\_VKM\_Ac-*  
*1817D.1273687*, *Arthrobacter\_chlorophenolicus\_A6.452863*, *Nakamurella\_multipartita\_DSM\_44233.479431*, *Corynebacteriu*  
*m\_sp.\_ATCC\_6931.1487956*, *Arthrobacter\_sp.\_LS16.1690248*, *Gardnerella\_vaginalis\_ATCC\_14019.525284*, *Corynebacteriu*  
*m\_ulcerans\_FRC58.1408268*, *Micromonospora\_sp.\_L5.648999*, *Corynebacterium\_singulare.161899*, *Pseudonocardia\_dioxan*  
*ivorans\_CB1190.675635*, *Kineococcus\_radiotolerans\_SRS30216\_ATCC\_BAA-*  
*149.266940*, *Mycobacterium\_goodii.134601*, *Rhodococcus\_jostii\_RHA1.101510*, *Actinomyces\_oris.544580*, *Streptomyces\_reti*  
*culi.1926*, *Saccharothrix\_espanaensis\_DSM\_44229.1179773*, *Jonesia\_denitrificans\_DSM\_20603.471856*, *Kutzneria\_albida\_DSM\_43870.1449976*, *Corynebacterium\_efficiens\_YS-*  
*314.196164*, *Nocardioides\_sp.\_JS614.196162*, *Streptomyces\_collinus\_Tu\_365.1214242*, *Corynebacterium\_mustelae.571915*,  
*Isoptricola\_variabilis\_225.743718*, *Kocuria\_palustris.71999*, *Stackebrandtia\_nassauensis\_DSM\_44728.446470*, *Kocuria\_rhiz*  
*ophila\_DC2201.378753*, *Segniliparus\_rotundus\_DSM\_44985.640132*, *Nocardia\_brasiliensis\_ATCC\_700358.1133849*, *Nocard*  
*ia\_farcinica.37329*, *Mycobacterium\_gilvum\_PYR-*  
 GCK.350054, *Blastococcus\_saxosidens\_DD2.1146883*, *Corynebacterium\_vitaeruminis\_DSM\_20294.1224164*, *Corynebacter*  
*iales\_bacterium\_X1698.1562462*, *Microbacterium\_sp.\_CGR1.1696072*, *Corynebacterium\_atypicum.191610*, *Bifidobacterium\_catenu*  
*latulum\_DSM\_16992\_JCM\_1194\_LMG\_11043.566552*, *Corynebacteriales\_bacterium\_X1036.1528099*, *Arthrobact*  
*er\_sp.\_Hiyo8.1588023*, *Propionibacterium\_avidum\_44067.1170318*, *Corynebacterium\_doosanense\_CAU\_212\_DSM\_4543*  
*6.558173*, *Rhodococcus\_opacus\_PD630.543736*, *Clavibacter\_michiganensis\_subsp.\_sepedonicus.31964*
- 3 *Leifsonia\_xyli\_subsp.\_cynodontis\_DSM\_46306.1389489*, *Microbacterium\_sp.\_PAMC\_28756.1795053*, *Mycobacterium\_indic*  
*us\_pranii\_MTCC\_9506.1232724*, *Corynebacterium\_lactis\_RW2-*  
*5.1408189*, *Gordonia\_bronchialis\_DSM\_43247.526226*, *Nakamurella\_multipartita\_DSM\_44233.479431*, *Arthrobacter\_penan*  
*threnivorans\_Sphe3.930171*, *Pseudonocardia\_sp.\_EC080610-*  
*09.1688404*, *Corynebacteriales\_bacterium\_X1036.1528099*, *Thermobifida\_fusca\_YX.269800*, *Streptomyces\_xiamenensis.40*  
*8015*, *Arthrobacter\_chlorophenolicus\_A6.452863*, *Mycobacterium\_leprae\_Br4923.561304*, *Mycobacterium\_goodii.134601*, *Str*  
*eptomycies\_albulus\_ZPM.1434306*, *Actinoplanes\_missouriensis\_431.512565*, *Pseudonocardia\_sp.\_AL041005-*  
*10.445576*, *Luteipulveratus\_mongoliensis.571913*, *Pimelobacter\_simplex.2045*, *Xylanimonas\_cellulosilytica\_DSM\_15894.446*  
*471*, *Corynebacterium\_humireducens\_NBRC\_106098\_DSM\_45392.1223515*, *Bifidobacterium\_bifidum.1681*, *Micromonosp*  
*ora\_aurantiaca\_ATCC\_27029.644283*, *Mycobacterium\_vanbaalenii\_PYR-*  
*1.350058*, *Frankia\_symbiont\_of\_Datisca\_glomerata.656024*, *Blastococcus\_saxosidens\_DD2.1146883*, *Streptomyces\_hygro*  
*scopicus\_subsp.\_jinggagensis\_5008.1133850*, *Mycobacterium\_liflandii\_128FXT.459424*, *Streptomyces\_reticuli.1926*, *Actino*  
*myces\_oris.544580*, *Slackia\_heliotrinireducens\_DSM\_20476.471855*, *Mycobacterium\_fortuitum.1766*, *Streptomyces\_violaceu*  
*sniger\_Tu\_4113.653045*, *Frankia\_sp.\_EAN1pec.298653*, *Saccharothrix\_espanaensis\_DSM\_44229.1179773*, *Actinomyces\_sp*  
*\_oral\_taxon\_414.712122*, *Actinomyces\_radicidentis.111015*, *Corynebacterium\_argentoratense\_DSM\_44202.1348662*, *Bifido*  
*bacterium\_scardovii\_JCM\_12489\_DSM\_13734.1150461*, *Arthrobacter\_sp.\_YC-*  
*RL1.1652545*, *Streptomyces\_sp.\_769.1262452*, *Mycobacterium\_intracellulare\_MOTT-*  
*64.1138383*, *Corynebacterium\_halotolerans\_YIM\_70093\_DSM\_44683.1121362*, *Rhodoluna\_lacicola.529884*, *Corynebacter*  
*ium\_callunae\_DSM\_20147.1121353*, *Mycobacterium\_rhodesiae\_NBB3.710685*, *Bifidobacterium\_thermophilum\_RBL67.1254*  
*439*, *Mycobacterium\_yongonense\_05-*  
*1390.1138871*, *Corynebacterium\_resistens\_DSM\_45100.662755*, *Actinobacteria\_bacterium\_IMCC26256.1650658*, *Micromon*  
*ospora\_sp.\_L5.648999*, *Nocardia\_cyriaci-georgica\_GUH-2.1127134*, *Kitasatospora\_setae\_KM-*



6054.452652, *Mycobacterium\_kansasii*\_ATCC\_12478.557599, *Propionibacterium\_propionicum*\_F0230a.767029, *Bifidobacterium\_catenumulatum*\_DSM\_16992\_\_\_JCM\_1194\_\_\_LMG\_11043.566552, *Corynebacterium\_maris*\_DSM\_45190.1224163, *Salinispora\_arenicola*\_CNS-205.391037, *Bifidobacterium\_coryneforme*.1687, *Arcanobacterium\_haemolyticum*\_DSM\_20595.644284, *Nocardia\_nova*\_SH22a.1415166, *Streptomyces\_glaucescens*.1907, *Corynebacterium\_diphtheriae*\_31A.698962, *Gordonia\_sp.\_QH*-11.1136941, *Sanguibacter\_keddiei*\_DSM\_10542.446469, *Ilumatobacter\_coccineus*\_YM16-304.1313172, *Arthrobacter\_aureus*\_TC1.290340, *Modestobacter\_marinus*.477641, *Renibacterium\_salmoninarum*\_ATCC\_33209.288705, *Arthrobacter\_sp.\_ERGS1\_01*.1704044, *Salinispora\_tropica*\_CNB-440.369723, *Kocuria\_rhizophila*\_DC2201.378753, *Microbacterium\_testaceum*\_StLB037.979556, *Microbacterium\_sp.\_No.\_7*.1714373, *Streptomyces\_sp.\_CdTB01*.1725411, *Isopetricola\_variabilis*.225.743718, *Streptomyces\_bingchenggensis*\_BCW-1.749414, *Kribbella\_flavida*\_DSM\_17836.479435, *Rothia\_mucilaginosa*\_DY-18.680646, *Streptomyces\_pratensis*\_ATCC\_33331.591167, *Bifidobacterium\_asteroides*\_PRL2011.1147128, *Thermomonospora\_curvata*\_DSM\_43183.471852, *Bifidobacterium\_breve*.1685, *Propionibacterium\_freudenreichii\_subsp.\_shermanii*\_CIRM-BIA1.754252, *Streptomyces\_albus*.1888, *Mycobacterium\_haemophilum*\_DSM\_44634.1202450

4 *Corynebacterium\_jeikeium*\_K411.306537, *Scardovia\_inopinata*\_JCM\_12537.1150468, *Propionibacterium\_acnes*\_C1.1234380, *Actinomyces\_sp.\_oral\_taxon\_414*.712122, *Streptomyces\_sp.\_769*.1262452, *Streptomyces\_sp.\_CFMR\_7*.1649184, *Corynebacterium\_halotolerans*\_YIM\_70093\_\_\_DSM\_44683.1121362, *Streptomyces\_fulvisimus*\_DSM\_40593.1303692, *Amycolatopsis\_japonica*.208439, *Streptomyces\_vietnamensis*.362257, *Microterricola\_viridarii*.412690, *Nocardia\_cyriacigeorgica*\_GUH-2.1127134, *Corynebacteriales\_bacterium\_X1036*.1528099, *Corynebacterium\_humireducens*\_NBRC\_106098\_\_\_DSM\_45392.1223515, *Corynebacterium\_glyciniphilum\_AJ\_3170*.1404245, *Blastococcus\_saxobsidens*\_DD2.1146883, *Corynebacterium\_uterequi*.1072256, *Nocardiosis\_dassonvillei\_subsp.\_dassonvillei*\_DSM\_43111.446468, *Pseudonocardia\_sp.\_AL041005*-10.445576, *Corynebacterium\_marinum*\_DSM\_44953.1224162, *Arthrobacter\_phenanthrenivorans*\_Sphe3.930171, *Bifidobacterium\_thermophilum\_RBL67*.1254439, *Micromonospora\_sp.\_L5*.648999, *Propionibacterium\_acidipropionici*\_ATCC\_4875.1171373, *Mycobacterium\_yongonense*\_05-1390.1138871, *Slackia\_heliotrinireducens*\_DSM\_20476.471855, *Streptomyces\_xiamenensis*.408015, *Bifidobacterium\_indicium\_LMG\_11587\_\_\_DSM\_20214*.1341694, *Frankia\_symbiont\_of\_Datisca\_glomerata*.656024, *Actinoplanes\_sp.\_N902*-109.649831, *Mycobacterium\_sp.\_KMS*.189918, *Bifidobacterium\_pseudolongum\_PV8*-2.1447715, *Streptomyces\_glaucescens*.1907, *Mycobacterium\_microti*.1806, *Geodermatophilus\_obscurus*\_DSM\_43160.526225, *Microtholunatus\_phosphovorus*\_NM-1.1032480, *Coriobacteriaceae\_bacterium\_68*-1-3.1531429, *Bifidobacterium\_angulatum*\_DSM\_20098\_\_\_JCM\_7096.518635, *Brachybacterium\_faecium*\_DSM\_4810.446465, *Mycobacterium\_rhodesiae*\_NBB3.710685, *Eggerthella\_lenta*\_DSM\_2243.479437, *Corynebacterium\_kutscheri*.35755, *Actinoplanes\_missouriensis*.431.512565, *Frankia\_sp.\_EAN1pec*.298653, *Actinoplanes\_friuliensis*\_DSM\_7358.1246995, *Saccharomonospora\_viridis*\_DSM\_43017.471857, *Sanguibacter\_keddiei*\_DSM\_10542.446469, *Arthrobacter\_aureus*\_TC1.290340, *Streptomyces\_sp.\_CdTB01*.1725411, *Gordonia\_sp.\_QH*-11.1136941, *Corynebacterium\_kroppenstedtii*\_DSM\_44385.645127, *Cryptobacterium\_curtum*\_DSM\_15641.469378, *Gordonia\_sp.\_KTR9*.337191, *Corynebacterium\_camporealis*.161896, *Arthrobacter\_sp.\_PAMC25486*.1494608, *Actinosynnema\_mirum*\_DSM\_43827.446462, *Bifidobacterium\_asteroides*\_PRL2011.1147128, *Corynebacterium\_dooanense*\_CAU\_212\_\_\_DSM\_45436.558173, *Actinomyces\_meyeri*.52773, *Rathayibacter\_toxicus*.145458, *Rhodococcus\_opacus\_P*D630.543736, *Actinoplanes\_sp.\_SE50*\_110.134676, *Arthrobacter\_sp.\_LS16*.1690248, *Verrucosipora\_maris\_AB*-18-032.263358, *Mycobacterium\_sinense*.875328, *Intrasporangium\_calvum*\_DSM\_43043.710696, *Jonesia\_denitrificans*\_DSM\_20603.471856, *Corynebacterium\_diphtheriae*\_31A.698962, *Bifidobacterium\_animalis\_subsp.\_lactis*\_CNCM\_I-2494.1042403, *Kitasatospora\_setae*\_KM-6054.452652, *Mycobacterium\_sp.\_MCS*.164756, *Corynebacterium\_callunae*\_DSM\_20147.1121353, *Mycobacterium\_gilvum\_PYR*-GCK.350054, *Corynebacterium\_deserti*\_GIMN1.010.931089, *Mycobacterium\_marinum\_M*.216594, *Corynebacterium\_casei*\_LMG\_S-19264.1285583, *Rothia\_dentocariosa*\_ATCC\_17931.762948, *Amycolatopsis\_mediterranei*\_S699.713604, *Corynebacterium\_maris*\_DSM\_45190.1224163, *Streptomyces\_avermitilis*\_MA-4680\_\_\_NBRC\_14893.227882, *Microbacterium\_sp.\_PAMC\_28756*.1795053, *Streptomyces\_hygroscopicus\_subsp.\_jinggangensis*\_5008.1133850, *Amycolicococcus\_subflavus*\_DQS3-9A1.443218, *Bifidobacterium\_longum\_subsp.\_infantis*\_ATCC\_15697\_\_\_JCM\_1222\_\_\_DSM\_20088.391904, *Actinomyces\_oris*.544580, *Nakamurella\_multipartita*\_DSM\_44233.479431

5 *Streptomyces\_avermitilis*\_MA-4680\_\_\_NBRC\_14893.227882, *Frankia\_sp.\_EAN1pec*.298653, *Olsenella\_sp.\_oral\_taxon\_807*.712411, *Corynebacterium\_glutamicum\_R*.340322, *Catenulipora\_acidiphila*\_DSM\_44928.479433, *Mycobacterium\_goodii*.134601, *Bifidobacterium\_pseudolongum\_PV8*-2.1447715, *Propionibacterium\_propionicum*\_F0230a.767029, *Actinomyces\_sp.\_oral\_taxon\_414*.712122, *Gordonia\_sp.\_KTR9*.337191, *Propionibacterium\_freudenreichii\_subsp.\_shermanii*\_CIRM-BIA1.754252, *Corynebacterium\_falsenii*\_DSM\_44353.1451189, *Corynebacteriales\_bacterium\_X1698*.1562462, *Gordonia\_polysoprenivorans\_VH2*.1112204, *Actinoplanes\_missouriensis*.431.512565, *Arthrobacter\_sp.\_Hiyo8*.1588023, *Rathayibacter\_toxicus*.145458, *Eggerthella\_lenta*\_DSM\_2243.479437, *Mycobacterium\_sp.\_MCS*.164756, *Leifsonia\_xyli\_subsp.\_cynodontis*\_DSM\_46306.1389489, *Arthrobacter\_sp.\_LS16*.1690248, *Segniliparus\_rotundus*\_DSM\_44985.640132, *Arcanobacterium\_haemolyticum*\_DSM\_20595.644284, *Thermobifida\_fusca\_YX*.269800, *Atopobium\_parvulum*\_DSM\_20469.521095, *Bifidobacterium\_b*

reve.1685,Streptomyces\_sp.\_CNQ-  
509.444103,Corynebacterium\_kutscheri.35755,Sanguibacter\_keddiei\_DSM\_10542.446469,Aeromicrobium\_erythreum.204  
1,Actinobacteria\_bacterium\_IMCC26256.1650658,Kytococcus\_sedentarius\_DSM\_20547.478801,Arthrobacter\_alpinus.6563  
66,Mycobacterium\_rhodesiae\_NBB3.710685,Coriobacterium\_glomerans\_PW2.700015,Corynebacterium\_casei\_LMG\_S-  
19264.1285583,Rubrobacter\_xylanophilus\_DSM\_9941.266117,Mycobacterium\_intracellulare\_MOTT-  
64.1138383,Mycobacterium\_sp.\_VKM\_Ac-  
1817D.1273687,Bifidobacterium\_kashiwanohense\_JCM\_15439\_\_\_DSM\_21854.1150460,Conexibacter\_woesei\_DSM\_1468  
4.469383,Frankia\_alni\_ACN14a.326424,Streptomyces\_hygroscopicus\_subsp.\_jinggangensis\_5008.1133850,Olsenella\_uli  
DSM\_7084.633147,Nocardia\_farcinica.37329,Streptosporangium\_roseum\_DSM\_43021.479432,Actinotignum\_schaalii.5950  
5,Blastococcus\_saxobsidens\_DD2.1146883,Kutzneria\_albida\_DSM\_43870.1449976,\_Brevibacterium\_\_flavum.92706,Rhod  
ococcus\_erythropilis\_PR4.234621,Streptomyces\_sp.\_CFMR\_7.1649184,Streptomyces\_glaucescens.1907,Streptomyces\_g  
lobisporus\_C-  
1027.1172567,Corynebacterium\_kroppenstedtii\_DSM\_44385.645127,Arthrobacter\_phenanthrenivorans\_Sphe3.930171,Aci  
dothermus\_cellulolyticus\_11B.351607,Corynebacterium\_argentoratense\_DSM\_44202.1348662,Cryptobacterium\_curtum\_D  
SM\_15641.469378,Corynebacterium\_testudinoris.136857,Salinispora\_tropica\_CNB-  
440.369723,Arthrobacter\_aureusens\_TC1.290340,Saccharothrix\_espanaensis\_DSM\_44229.1179773,Rhodococcus\_opacu  
s\_PD630.543736,Actinomyces\_oris.544580,Adlercreutzia\_equolifaciens\_DSM\_19450.1384484,Salinispora\_arenicola\_CNS-  
205.391037,Streptomyces\_vietnamensis.362257,Frankia\_sp.\_Ccl3.106370,Mycobacterium\_sp.\_EPa45.1545728,Bifidobact  
erium\_catenulatum\_DSM\_16992\_\_\_JCM\_1194\_\_\_LMG\_11043.566552,Corynebacterium\_ureicelerivorans.401472,Frankia  
\_symbiont\_of\_Datisca\_glomerata.656024,Coriobacteriaceae\_bacterium\_68-1-  
3.1531429,Eggerthella\_sp.\_YY7918.502558,Bifidobacterium\_indicum\_LMG\_11587\_\_\_DSM\_20214.1341694,Kibdelosporan  
gium\_phytohabitans.860235,Mycobacterium\_neoaurum\_VKM\_Ac-  
1815D.700508,Amycolatopsis\_orientalis\_HCCB10007.1156913,Rothia\_dentocariosa\_ATCC\_17931.762948,Bifidobacterium  
\_scardovii\_JCM\_12489\_\_\_DSM\_13734.1150461,Pseudonocardia\_sp.\_EC080625-  
04.1096868,Microbacterium\_sp.\_XT11.367477,Arthrobacter\_sulfonivorans.121292,Arthrobacter\_sp.\_IHBB\_11108.1618207,  
Cellulomonas\_fimi\_ATCC\_484.590998

6 Streptomyces\_vietnamensis.362257,Rhodoluna\_lacicola.529884,Mycobacterium\_rhodesiae\_NBB3.710685,Frankia\_alni\_A  
CN14a.326424,Micromonospora\_sp.\_L5.648999,Eggerthella\_sp.\_YY7918.502558,Rathayibacter\_toxicus.145458,Streptosp  
orangium\_roseum\_DSM\_43021.479432,Streptomyces\_leeuwenhoekii.1437453,Corynebacterium\_halotolerans\_YIM\_70093  
\_\_\_DSM\_44683.1121362,Illumatobacter\_coccineus\_YM16-  
304.1313172,Saccharothrix\_espanaensis\_DSM\_44229.1179773,Coriobacterium\_glomerans\_PW2.700015,Beutenbergia\_ca  
vernae\_DSM\_12333.471853,Actinomyces\_sp.\_oral\_taxon\_414.712122,Rhodococcus\_jostii\_RHA1.101510,Mycobacterium\_  
ulcerans\_Agy99.362242,Actinotignum\_schaalii.59505,Frankia\_sp.\_Eul1c.298654,Mycobacterium\_bovis\_BCG.33892,Coryn  
ebacterium\_singulare.161899,Mycobacterium\_chubuense\_NBB4.710421,Mycobacterium\_gilvum\_PYR-  
GCK.350054,Bifidobacterium\_coryneforme.1687,Corynebacterium\_efficiens\_YS-  
314.196164,Kutzneria\_albida\_DSM\_43870.1449976,Brachybacterium\_faecium\_DSM\_4810.446465,Mycobacterium\_sp.\_K  
MS.189918,Nocardiopsis\_alba\_ATCC\_BAA-  
2165.1205910,Microbacterium\_sp.\_CGR1.1696072,Bifidobacterium\_animalis\_subsp.\_lactis\_CNCM\_I-  
2494.1042403,Corynebacterium\_diphtheriae\_31A.698962,Mycobacterium\_sp.\_JS623.212767,Corynebacterium\_marinum\_  
DSM\_44953.1224162,Propionibacterium\_acidipropionici\_ATCC\_4875.1171373,Luteipulveratus\_mongoliensis.571913,Cory  
nebacterium\_atypicum.191610,Stackebrandtia\_nassauensis\_DSM\_44728.446470,Mycobacterium\_avium\_104.243243,Cellu  
lomonas\_fimi\_ATCC\_484.590998,Bifidobacterium\_actinocoloniiforme\_DSM\_22766.1437605,Coriobacteriaceae\_bacterium\_  
68-1-  
3.1531429,Corynebacterium\_doosanense\_CAU\_212\_\_\_DSM\_45436.558173,Rubrobacter\_xylanophilus\_DSM\_9941.26611  
7,Bifidobacterium\_asteroides\_PRL2011.1147128,Bifidobacterium\_pseudolongum\_PV8-  
2.1447715,Arthrobacter\_sp.\_Rue61a.1118963,Pseudonocardia\_sp.\_EC080610-  
09.1688404,Mycobacterium\_sinense.875328,Rothia\_mucilaginis\_DY-  
18.680646,Mycobacterium\_marinum\_M.216594,Streptomyces\_fulvissimus\_DSM\_40593.1303692,Streptomyces\_venezuela  
e.54571,Sanguibacter\_keddiei\_DSM\_10542.446469,Kitasatospora\_setae\_KM-6054.452652,Streptomyces\_avermitilis\_MA-  
4680\_\_\_NBRC\_14893.227882,Mycobacterium\_goodii.134601,Rhodococcus\_sp.\_B7740.1564114,Corynebacterium\_ulceran  
s\_FRC58.1408268,Rothia\_dentocariosa\_ATCC\_17931.762948,Microbacterium\_sp.\_XT11.367477,Streptomyces\_cattleya\_  
NRRL\_8057\_\_\_DSM\_46488.1003195,Pseudonocardia\_sp.\_HH130629-  
09.1641402,Renibacterium\_salmoninarum\_ATCC\_33209.288705,Streptomyces\_scabiei\_87.22.680198,Intrasporangium\_cal  
vum\_DSM\_43043.710696,Arthrobacter\_alpinus.656366,Actinoplanes\_sp.\_N902-  
109.649831,Corynebacterium\_argentoratense\_DSM\_44202.1348662,Streptomyces\_sp.\_4F.1751294,Mycobacterium\_vanb  
aalenii\_PYR-  
1.350058,Streptomyces\_albus.1888,Blastococcus\_saxobsidens\_DD2.1146883,Jonesia\_denitrificans\_DSM\_20603.471856,  
Corynebacterium\_falsenii\_DSM\_44353.1451189,Streptomyces\_collinus\_Tu\_365.1214242,Actinoplanes\_sp.\_SE50\_110.134  
676,Cellulomonas\_flavigena\_DSM\_20109.446466,Streptomyces\_hygroscopicus\_subsp.\_jinggangensis\_5008.1133850,Bifid  
obacterium\_thermophilum\_RBL67.1254439,Bifidobacterium\_angulatum\_DSM\_20098\_\_\_JCM\_7096.518635,Corynebacteria  
les\_bacterium\_X1698.1562462,Arthrobacter\_sp.\_ATCC\_21022.1771959,Bifidobacterium\_kashiwanohense\_JCM\_15439\_\_\_  
DSM\_21854.1150460,Trueperella\_pyogenes\_TP8.1435056,Verrucosipora\_maris\_AB-18-032.263358

- 7 Streptomyces\_albulus\_ZPM.1434306,Mycobacterium\_sp.\_JS623.212767,Trueperella\_pyogenes\_TP8.1435056,Corynebacterium\_lactis\_RW2-5.1408189,Streptomyces\_sp.\_CdTB01.1725411,Actinoplanes\_sp.\_SE50\_110.134676,Microbacterium\_sp.\_No.\_7.1714373,Cellulomonas\_gilvus\_ATCC\_13127.593907,Mycobacterium\_microti.1806,Bifidobacterium\_dentium\_JCM\_1195\_DSM\_20436.1150423,Rhodococcus\_jostii\_RHA1.101510,Intrasporangium\_calvum\_DSM\_43043.710696,Stackebrandtia\_nassauensis\_DSM\_44728.446470,Verrucosipora\_maris\_AB-18-032.263358,Nocardia\_cyriacigeorgica\_GUH-2.1127134,Corynebacterium\_ureicelerivorans.401472,Bifidobacterium\_bifidum.1681,Actinoplanes\_friuliensis\_DSM\_7358.1246995,Kibdelosporangium\_phytohabitans.860235,Streptomyces\_violaceusniger\_Tu\_4113.653045,Luteipulveratus\_mongolensis.571913,Pimelobacter\_simplex.2045,Corynebacterium\_kroppenstedtii\_DSM\_44385.645127,Amycolatopsis\_mediterranei\_S699.713604,Bifidobacterium\_adolescentis.1680,Streptomyces\_scabiei\_87.22.680198,Bifidobacterium\_scardovii\_JCM\_12489\_DSM\_13734.1150461,Mobiluncus\_curtisii\_ATCC\_43063.548479,Arthrobacter\_sp.\_FB24.290399,Mycobacterium\_kansasii\_ATCC\_12478.557599,Mycobacterium\_sp.\_MCS.164756,Mycobacterium\_gilvum\_PYR-GCK.350054,Propionibacterium\_propionicum\_F0230a.767029,Brevibacterium\_flavum\_92706,Microbacterium\_sp.\_PAMC\_28756.1795053,Conexibacter\_woesei\_DSM\_14684.469383,Amycolatopsis\_japonica.208439,Kitasatospora\_setae\_KM-6054.452652,Nocardia\_farcinica.37329,Cryptobacterium\_curtum\_DSM\_15641.469378,Amycolicicoccus\_subflavus\_DQS3-9A1.443218,Cellulomonas\_flavigena\_DSM\_20109.446466,Thermobifida\_fusca\_YX.269800,Streptomyces\_vietnamensis.362257,Rubrobacter\_radiotolerans.42256,Mycobacterium\_liflandii\_128FXT.459424,Illumatobacter\_coccineus\_YM16-304.1313172,Corynebacterium\_resistens\_DSM\_45100.662755,Streptomyces\_sp.\_769.1262452,Nocardioopsis\_dassonvillei\_subsp.\_dassonvillei\_DSM\_43111.446468,Streptomyces\_cattleya\_NRRL\_8057\_DSM\_46488.1003195,Arthrobacter\_phenanthrenivorans\_Sphe3.930171,Microterricola\_viridarii.412690,Saccharothrix\_espansensis\_DSM\_44229.1179773,Nakamuraella\_multipartita\_DSM\_44233.479431,Gordonia\_bronchialis\_DSM\_43247.526226,Nocardia\_nova\_SH22a.1415166,Arthrobacter\_sp.\_A3.595593,Arthrobacter\_sp.\_Rue61a.1118963,Actinobacteria\_bacterium\_IMCC26256.1650658,Arthrobacter\_sp.\_ATCC\_21022.1771959,Mycobacterium\_neoaurum\_VKM\_Ac-1815D.700508,Segniliparus\_rotundus\_DSM\_44985.640132,Jonesia\_denitrificans\_DSM\_20603.471856,Streptomyces\_albus.1888,Bifidobacterium\_coryneforme.1687,Streptomyces\_lydicus\_A02.1403539,Micrococcus\_luteus\_NCTC\_2665.465515,Coriobacteriaceae\_bacterium\_68-1-3.1531429,Mycobacterium\_sp.\_JLS.164757,Acidothermus\_cellulolyticus\_11B.351607,Pseudonocardia\_sp.\_EC080610-09.1688404,Leifsonia\_xylii\_subsp.\_cynodontis\_DSM\_46306.1389489,Arthrobacter\_arilaitensis.256701,Actinotignum\_schaalii.59505,Streptosporangium\_roseum\_DSM\_43021.479432,Corynebacterium\_camporealensis.161896,Dermaecoccus\_nishino-miyaensis.1274,Rhodococcus\_erythropolis\_PR4.234621,Mycobacterium\_leprae\_Br4923.561304,Micromonospora\_sp.\_L5.648999,Saccharomonospora\_viridis\_DSM\_43017.471857,Mycobacterium\_abscessus\_subsp.\_bolletii\_50594.1303024,Actinomyces\_radicidentis.111015,Kocuria\_palustris.71999,Microbacterium\_sp.\_XT11.367477
- 8 Corynebacterium\_vitaeruminis\_DSM\_20294.1224164,Streptomyces\_sp.\_4F.1751294,Corynebacterium\_diphtheriae\_31A.698962,Micrococcus\_luteus\_NCTC\_2665.465515,Pseudonocardia\_sp.\_EC080610-09.1688404,Rathayibacter\_toxicus.145458,Bifidobacterium\_pseudocatenulatum\_DSM\_20438\_JCM\_1200\_LMG\_10505.547043,Bifidobacterium\_longum\_subsp.\_infantis\_ATCC\_15697\_JCM\_1222\_DSM\_20088.391904,Rhodococcus\_opacus\_PD630.543736,Brachybacterium\_faecium\_DSM\_4810.446465,Bifidobacterium\_indicum\_LMG\_11587\_DSM\_20214.1341694,Propionibacterium\_propionicum\_F0230a.767029,Illumatobacter\_coccineus\_YM16-304.1313172,Bifidobacterium\_dentium\_JCM\_1195\_DSM\_20436.1150423,Frankia\_sp.\_EAN1pec.298653,Corynebacterium\_ureicelerivorans.401472,Nocardia\_cyriacigeorgica\_GUH-2.1127134,Modestobacter\_marinus.477641,Mycobacterium\_indicus\_pranii\_MTCC\_9506.1232724,Actinomyces\_oris.544580,Mycobacterium\_chubuense\_NBB4.710421,Arthrobacter\_arilaitensis.256701,Bifidobacterium\_bifidum.1681,Arthrobacter\_sp.\_ATCC\_21022.1771959,Rothia\_mucilaginosa\_DY-18.680646,Corynebacterium\_stationis.1705,Verrucosipora\_maris\_AB-18-032.263358,Kocuria\_palustris.71999,Acidimicrobium\_ferroxidans\_DSM\_10331.525909,Mycobacterium\_marinum\_M.216594,Kitasatospora\_setae\_KM-6054.452652,Mycobacterium\_sp.\_JS623.212767,Corynebacterium\_atypicum.191610,Arcanobacterium\_haemolyticum\_DS\_M\_20595.644284,Mycobacterium\_sp.\_EPa45.1545728,Kibdelosporangium\_phytohabitans.860235,Intrasporangium\_calvum\_DSM\_43043.710696,Arthrobacter\_sp.\_LS16.1690248,Corynebacterium\_pseudotuberculosis.1719,Arthrobacter\_sp.\_ERGS1\_01.1704044,Eggerthella\_lenta\_DSM\_2243.479437,Corynebacterium\_humireducens\_NBRC\_106098\_DSM\_45392.1223515,Actinosynnema\_mirum\_DSM\_43827.446462,Coriobacterium\_glomerans\_PW2.700015,Renibacterium\_salmoninarum\_ATCC\_33209.288705,Corynebacterium\_deserti\_GIMN1.010.931089,Bifidobacterium\_scardovii\_JCM\_12489\_DSM\_13734.1150461,Rubrobacter\_xylanophilus\_DSM\_9941.266117,Corynebacterium\_ulcerans\_FRC58.1408268,Rubrobacter\_radiotolerans.42256,Dermaecoccus\_nishinomiyaensis.1274,Mycobacterium\_haemophilum\_DSM\_44634.1202450,Adlercreutzia\_eq\_uolificiens\_DSM\_19450.1384484,Nocardia\_nova\_SH22a.1415166,Streptomyces\_pristinaespiralis.38300,Mycobacterium\_kansasii\_ATCC\_12478.557599,Mycobacterium\_leprae\_Br4923.561304,Amycolatopsis\_lurida\_NRRL\_2430.1460371,Cryptobacterium\_curtum\_DSM\_15641.469378,Nocardioopsis\_alba\_ATCC\_BAA-2165.1205910,Streptomyces\_bingchenggensis\_BCW-1.749414,Streptomyces\_lydicus\_A02.1403539,Tropheryma\_whipplei\_str.\_Twist.203267,Kutzneria\_albida\_DSM\_43870.1449976,Isopterocola\_variabilis\_225.743718,Gordonia\_polyisoprenivorans\_VH2.1112204,Bifidobacterium\_adolescentis.1680,Actinoplanes\_missouriensis\_431.512565,Streptomyces\_sp.\_CNQ-509.444103,Corynebacterium\_marinum\_DSM\_44953.1224162,Corynebacterium\_jeikeium\_K411.306537,Streptomyces\_sp.\_Mg1.465541,Nocardioopsis\_dassonvillei\_subsp.\_dassonvillei\_DSM\_43111.446468,Rhodococcus\_sp.\_B7740.1564114,Streptomyces\_violaceusniger\_Tu\_4113.653045,Microbacterium\_sp.\_PAMC\_28756.1795053,Bifidobacterium\_pseudolongum\_P

V8-2.1447715,Corynebacterium\_camporealis.161896,Streptomyces\_globisporus\_C-1027.1172567,Devriesea\_agamarum.472569,Corynebacterium\_argentoratense\_DSM\_44202.1348662,Mycobacterium\_neoaurum\_VKM\_Ac-1815D.700508,Corynebacteriales\_bacterium\_X1698.1562462,Actinomyces\_radidentis.111015,Actinoplanes\_friulensis\_DSM\_7358.1246995,Catenulispora\_acidiphila\_DSM\_44928.479433

- 9 Mycobacterium\_sp.\_JS623.212767,Streptomyces\_vietnamensis.362257,Acidimicrobium\_ferroxidans\_DSM\_10331.525909,Mycobacterium\_avium\_104.243243,Kribbella\_flavida\_DSM\_17836.479435,Corynebacterium\_uterequi.1072256,Kocuria\_fla va.446860,Streptomyces\_hygroscopicus\_subsp.\_jinggangensis\_5008.1133850,Nocardia\_brasiliensis\_ATCC\_700358.11338 49,Mycobacterium\_liflandii\_128FXT.459424,Corynebacterium\_ulcerans\_FRC58.1408268,Cellulomonas\_gilvus\_ATCC\_1312 7.593907,Corynebacterium\_epidermidicanis.1050174,Atopobium\_parvulum\_DSM\_20469.521095,Arthrobacter\_sp.\_IHBB\_1 1108.1618207,Streptomyces\_collinus\_Tu\_365.1214242,Mycobacterium\_tuberculosis.1773,Thermobispora\_bispora\_DSM\_4 3833.469371,Saccharopolyspora\_erythraea\_NRRL\_2338.405948,Bifidobacterium\_angulatum\_DSM\_20098\_\_\_\_JCM\_7096.5 18635,Arthrobacter\_sp.\_PAMC25486.1494608,Streptomyces\_bingchenggensis\_BCW-1.749414,Mycobacterium\_sp.\_KMS.189918,Ilumatobacter\_coccineus\_YM16-304.1313172,Streptomyces\_cattleya\_NRRL\_8057\_\_\_\_DSM\_46488.1003195,Corynebacterium\_variabile\_DSM\_44702.85861 9,Corynebacterium\_argentoratense\_DSM\_44202.1348662,Streptomyces\_ambofaciens\_ATCC\_23877.278992,Arthrobacter\_chlorophenolicus\_A6.452863,Frankia\_sp.\_Eul1c.298654,Corynebacterium\_imitans.156978,Corynebacterium\_glyciniphilum\_AJ\_3170.1404245,Intrasporangium\_calvum\_DSM\_43043.710696,Mycobacterium\_chubuense\_NBB4.710421,Isopterocola\_variabilis\_225.743718,Gordonia\_polyisoprenivorans\_VH2.1112204,Mycobacterium\_sp.\_Epa45.1545728,Actinomyces\_mey eri.52773,Streptomyces\_sp.\_PAMC26508.1265601,Corynebacterium\_diphtheriae\_31A.698962,Bifidobacterium\_coryneform e.1687,Modestobacter\_marinus.477641,Streptomyces\_leeuwenhoekii.1437453,Corynebacterium\_jeikeium\_K411.306537,Bi fidobacterium\_bifidum.1681,Corynebacterium\_camporealis.161896,Xylanimonas\_cellulosilytica\_DSM\_15894.446471,My cobacterium\_indicus\_pranii\_MITCC\_9506.1232724,Arthrobacter\_sp.\_LS16.1690248,Mycobacterium\_ulcerans\_Agy99.36224 2,Bifidobacterium\_pseudolongum\_PV8-2.1447715,Corynebacterium\_pseudotuberculosis.1719,Streptomyces\_lydicus\_A02.1403539,Actinomyces\_sp.\_oral\_taxon\_4 14.712122,Arthrobacter\_sp.\_ATCC\_21022.1771959,Mycobacterium\_marinum\_M.216594,Blastococcus\_saxobsidens\_DD2. 1146883,Mycobacterium\_sp.\_MOTT36Y.1168287,Streptomyces\_sp.\_4F.1751294,Microbacterium\_sp.\_CGR1.1696072,Stre ptomyces\_xiamenensis.408015,Pseudonocardia\_dioxanivorans\_CB1190.675635,Corynebacterium\_humireducens\_NBRC\_106098\_\_\_\_DSM\_45392.1223515,Propionibacterium\_freudenreichii\_subsp.\_shermanii\_CIRM-BIA1.754252,Streptomyces\_venezuelae.54571,Gordonia\_bronchialis\_DSM\_43247.526226,Propionibacterium\_acidipropioni ci\_ATCC\_4875.1171373,Bifidobacterium\_longum\_subsp.\_infantis\_ATCC\_15697\_\_\_\_JCM\_1222\_\_\_\_DSM\_20088.391904,Cor ynebacterium\_casei\_LMG\_S-19264.1285583,Streptomyces\_reticuli.1926,Rubrobacter\_xylanophilus\_DSM\_9941.266117,Nakamurella\_multipartita\_DSM\_44233.479431,Corynebacterium\_mustelae.571915,Mycobacterium\_gilvum\_PYR-GCK.350054,Bifidobacterium\_catenulatum\_DSM\_16992\_\_\_\_JCM\_1194\_\_\_\_LMG\_11043.566552,Trueperella\_pyogenes\_TP8 1.435056,Thermobifida\_fusca\_YX.269800,Corynebacterium\_vitaeruminis\_DSM\_20294.1224164,Kitasatospora\_setae\_KM-6054.452652,Streptomyces\_violaceusniger\_Tu\_4113.653045,Corynebacterium\_kutscheri.35755,Conexibacter\_woesei\_DS M\_14684.469383,Streptomyces\_glaucescens.1907,Nocardiopsis\_alba\_ATCC\_BAA-2165.1205910,Corynebacterium\_urealyticum\_DSM\_7109.504474,Brachybacterium\_faecium\_DSM\_4810.446465
- 10 Mycobacterium\_sp.\_VKM\_Ac-1817D.1273687,Actinobacteria\_bacterium\_IMCC26256.1650658,Arthrobacter\_sp.\_LS16.1690248,Kocuria\_rhizophila\_DC22 01.378753,Streptomyces\_cyaneogriseus\_subsp.\_noncyanogenus.477245,Actinomyces\_meyeri.52773,Gardnerella\_vaginali s\_ATCC\_14019.525284,Kribbella\_flavida\_DSM\_17836.479435,Microlunatus\_phosphovorus\_NM-1.1032480,Streptomyces\_bingchenggensis\_BCW-1.749414,Mycobacterium\_ulcerans\_Agy99.362242,Streptomyces\_venezuelae.54571,Corynebacterium\_pseudotuberculosis. 1719,Corynebacterium\_glyciniphilum\_AJ\_3170.1404245,Arthrobacter\_sp.\_PAMC25486.1494608,Geodermatophilus\_obscur us\_DSM\_43160.526225,Streptomyces\_scabiei\_87.22.680198,Bifidobacterium\_bifidum.1681,Streptomyces\_collinus\_Tu\_36 5.1214242,Clavibacter\_michiganensis\_subsp.\_sepedonicus.31964,Corynebacterium\_mustelae.571915,Cellulomonas\_flavig ena\_DSM\_20109.446466,Cellulomonas\_fimi\_ATCC\_484.590998,Corynebacterium\_epidermidicanis.1050174,Streptomyces \_albulus\_ZPM.1434306,Streptomyces\_ambofaciens\_ATCC\_23877.278992,Bifidobacterium\_longum\_subsp.\_infantis\_ATCC \_15697\_\_\_\_JCM\_1222\_\_\_\_DSM\_20088.391904,Microbacterium\_sp.\_PAMC\_28756.1795053,Amycolatopsis\_orientalis\_HCC B10007.1156913,Propionibacterium\_propionicum\_F0230a.767029,Frankia\_symbiont\_of\_Datisca\_glomerata.656024,Myco bacterium\_chubuense\_NBB4.710421,Corynebacterium\_stationis.1705,Bifidobacterium\_scardovii\_JCM\_12489\_\_\_\_DSM\_1373 4.1150461,Eggerthella\_lenta\_DSM\_2243.479437,Streptomyces\_glaucescens.1907,Streptomyces\_sp.\_CNQ-509.444103,Pseudonocardia\_dioxanivorans\_CB1190.675635,Nocardioides\_sp.\_JS614.196162,Brachybacterium\_faecium\_ DSM\_4810.446465,Mycobacterium\_sinense.875328,Microbacterium\_sp.\_No\_7.1714373,Actinoplanes\_sp.\_N902-109.649831,Bifidobacterium\_animalis\_subsp.\_lactis\_CNCM\_I-2494.1042403,Frankia\_alni\_ACN14a.326424,Kytococcus\_sedentarius\_DSM\_20547.478801,Saccharopolyspora\_erythraea\_ NRRL\_2338.405948,Saccharothrix\_espanaensis\_DSM\_44229.1179773,Luteipulveratus\_mongoliensis.571913,Bifidobacteri um\_angulatum\_DSM\_20098\_\_\_\_JCM\_7096.518635,Arthrobacter\_sulfonivorans.121292,Intrasporangium\_calvum\_DSM\_430 43.710696,Frankia\_sp.\_Ccl3.106370,Gordonia\_bronchialis\_DSM\_43247.526226,Microbacterium\_sp.\_CGR1.1696072,Kine ococcus\_radiotolerans\_SRS30216\_\_\_\_ATCC\_BAA-149.266940,Micromonospora\_sp.\_L5.648999,Propionibacterium\_acnes\_C1.1234380,Mycobacterium\_sp.\_KMS.189918,Beu

- tenbergia\_cavernae\_DSM\_12333.471853,Corynebacterium\_sp.\_ATCC\_6931.1487956,Mycobacterium\_intracellulare\_MOT T-
- 64.1138383,Corynebacterium\_halotolerans\_YIM\_70093\_\_\_DSM\_44683.1121362,Corynebacterium\_urealyticum\_DSM\_710 9.504474,Sanguibacter\_keddiei\_DSM\_10542.446469,Streptomyces\_griseus\_subsp.\_griseus\_NBRC\_13350.455632,Actino myces\_sp.\_oral\_taxon\_414.712122,Arthrobacter\_sp.\_IHBB\_11108.1618207,Saccharomonospora\_viridis\_DSM\_43017.4718 57,Corynebacterium\_deserti\_GIMN1.010.931089,Nocardia\_nova\_SH22a.1415166,Corynebacterium\_efficiens\_YS- 314.196164,Salinispora\_arenicola\_CNS- 205.391037,Streptomyces\_sp.\_Mg1.465541,Cellulomonas\_gilvus\_ATCC\_13127.593907,Arthrobacter\_sp.\_Hiyo8.1588023, Rhodococcus\_opacus\_PD630.543736,Mycobacterium\_goodii.134601,Streptomyces\_pristinaespiralis.38300,Mycobacterium \_bovis\_BCG.33892,Gordonia\_sp.\_KTR9.337191,Jonesia\_denitrificans\_DSM\_20603.471856,Kocuria\_flava.446860,Microba cterium\_testaceum\_StLB037.979556,Corynebacterium\_lactis\_RW2-5.1408189,Corynebacterium\_imitans.156978
- 11 Streptomyces\_sp.\_Mg1.465541,Amycolatopsis\_mediterranei\_S699.713604,Corynebacterium\_variabile\_DSM\_44702.85861 9,Frankia\_sp.\_EAN1pec.298653,Amycolatopsis\_japonica.208439,Actinoplanes\_sp.\_N902- 109.649831,Geodermatophilus\_obscurus\_DSM\_43160.526225,Corynebacterium\_epidermidicantis.1050174,Gordonia\_bronc hialis\_DSM\_43247.526226,Frankia\_symbiont\_of\_Datisca\_glomerata.656024,Mycobacterium\_sp.\_KMS.189918,Frankia\_sp. \_Ccl3.106370,Propionibacterium\_acidipropionici\_ATCC\_4875.1171373,Tropheryma\_whipplei\_str.\_Twist.203267,Arthrobact er\_sp.\_LS16.1690248,Mycobacterium\_indicus\_pranii\_MTCC\_9506.1232724,Rhodococcus\_pyridinivorans\_SB3094.143535 6,Micromonospora\_sp.\_L5.648999,Streptomyces\_sp.\_SirexAA- E.862751,Olsenella\_uli\_DSM\_7084.633147,Bifidobacterium\_kashiwanohense\_JCM\_15439\_\_\_DSM\_21854.1150460,Strept omyces\_albulus\_ZPM.1434306,Streptomyces\_sp.\_CNQ- 509.444103,Leifsonia\_xyli\_subsp.\_cynodontis\_DSM\_46306.1389489,Micrococcus\_luteus\_NCTC\_2665.465515,Pseudonoc ardia\_sp.\_EC080625- 04.1096868,Mycobacterium\_chubuense\_NBB4.710421,Gordonia\_polyisoprenivorans\_VH2.1112204,Corynebacterium\_testu dinoris.136857,Bifidobacterium\_angulatum\_DSM\_20098\_\_\_JCM\_7096.518635,Adlercreutzia\_equolifaciens\_DSM\_19450.1 384484,Corynebacterium\_aurimucosum\_ATCC\_700975.548476,Amycolatopsis\_methanolica\_239.1068978,Nocardioidea s\_p.\_JS614.196162,Nocardiopsis\_alba\_ATCC\_BAA- 2165.1205910,Propionibacterium\_propionicum\_F0230a.767029,Salinispora\_tropica\_CNB- 440.369723,Streptomyces\_pratensis\_ATCC\_33331.591167,Nocardia\_nova\_SH22a.1415166,Corynebacterium\_humireduce ns\_NBRC\_106098\_\_\_DSM\_45392.1223515,Corynebacterium\_atypicum.191610,Arthrobacter\_sp.\_Rue61a.1118963,Strept omyces\_pristinaespiralis.38300,Arthrobacter\_sp.\_YC- RL1.1652545,Intrasporangium\_calvum\_DSM\_43043.710696,Coriobacteriaceae\_bacterium\_68-1- 3.1531429,Cellulomonas\_gilvus\_ATCC\_13127.593907,Brachybacterium\_faecium\_DSM\_4810.446465,Streptomyces\_sp.\_C FMR\_7.1649184,Corynebacterium\_mustelae.571915,Corynebacterium\_maris\_DSM\_45190.1224163,Modestobacter\_marin us.477641,Mycobacterium\_rhodesiae\_NBB3.710685,Corynebacterium\_terpenotabidum\_Y- 11.1200352,Thermobifida\_fusca\_YX.269800,Actinoplanes\_missouriensis\_431.512565,Pseudonocardia\_sp.\_EC080619- 01.1096856,Streptomyces\_collinus\_Tu\_365.1214242,Isophtericola\_variabilis\_225.743718,Illumatobacter\_coccineus\_YM16- 304.1313172,Mycobacterium\_tuberculosis.1773,Kibdelosporangium\_phytohabitans.860235,Actinomyces\_sp.\_oral\_taxon\_4 14.712122,Microbacterium\_sp.\_XT11.367477,Streptomyces\_sp.\_4F.1751294,Amycolatopsis\_lurida\_NRRL\_2430.1460371, Corynebacteriales\_bacterium\_X1036.1528099,Bifidobacterium\_asteroides\_PRL2011.1147128,Streptomyces\_hygroscopicu s\_subsp.\_jinggangensis\_5008.1133850,Arcanobacterium\_haemolyticum\_DSM\_20595.644284,Corynebacterium\_dooanense CAU\_212\_\_\_DSM\_45436.558173,Aeromicrobium\_erythreum.2041,Clavibacter\_michiganensis\_subsp.\_sepedonicus.319 64,Streptomyces\_bingchengensis\_BCW- 1.749414,Mycobacterium\_liflandii\_128FXT.459424,Mycobacterium\_fortuitum.1766,Actinomyces\_meyeri.52773,Corynebacte rium\_kutscheri.35755,Streptomyces\_leeuwenhoeckii.1437453,Propionibacterium\_avidum\_44067.1170318,Corynebacterium\_ camporealensis.161896,Rothia\_mucilaginosa\_DY- 18.680646,Arthrobacter\_sp.\_PAMC25486.1494608,Corynebacterium\_jeikeium\_K411.306537,Corynebacterium\_imitans.156 978,Streptomyces\_cyaneogriseus\_subsp.\_noncyanogenus.477245
- 12 Mycobacterium\_sp.\_EPa45.1545728,Microlunatus\_phosphovorus\_NM- 1.1032480,Blastococcus\_saxosidens\_DD2.1146883,Corynebacterium\_variabile\_DSM\_44702.858619,Actinosynnema\_mir um\_DSM\_43827.446462,Microbacterium\_sp.\_XT11.367477,Mycobacterium\_kansasii\_ATCC\_12478.557599,Corynebacteri um\_dooanense\_CAU\_212\_\_\_DSM\_45436.558173,Arthrobacter\_sp.\_IHBB\_11108.1618207,Corynebacterium\_ureiceleivor ans.401472,Propionibacterium\_avidum\_44067.1170318,Streptomyces\_avermitilis\_MA- 4680\_\_\_NBRC\_14893.227882,Amycolatopsis\_mediterranei\_S699.713604,Acidimicrobium\_ferrooxidans\_DSM\_10331.5259 09,Trueperella\_pyogenes\_TP8.1435056,Luteipulveratus\_mongoliensis.571913,Mycobacterium\_gilvum\_PYR- GCK.350054,Cellulomonas\_fimi\_ATCC\_484.590998,Streptomyces\_hygroscopicus\_subsp.\_jinggangensis\_5008.1133850,A mycolicococcus\_subflavus\_DQS3- 9A1.443218,Mycobacterium\_aviium\_104.243243,Coriobacterium\_glomerans\_PW2.700015,Eggerthella\_lenta\_DSM\_2243.47 9437,Streptomyces\_albus.1888,Mycobacterium\_intracellulare\_MOTT- 64.1138383,Tropheryma\_whipplei\_str.\_Twist.203267,Corynebacterium\_marinum\_DSM\_44953.1224162,Bifidobacterium\_in dicum\_LMG\_11587\_\_\_DSM\_20214.1341694,Mycobacterium\_sp.\_VKM\_Ac- 1817D.1273687,Corynebacterium\_urealyticum\_DSM\_7109.504474,Bifidobacterium\_breve.1685,Corynebacterium\_stationis. 1705,Amycolatopsis\_japonica.208439,Mycobacterium\_sinense.875328,Amycolatopsis\_lurida\_NRRL\_2430.1460371,Gordon ia\_bronchialis\_DSM\_43247.526226,Mycobacterium\_neoaurum\_VKM\_Ac-1815D.700508,Streptomyces\_globisporus\_C-

- 1027.1172567, *Streptomyces xiamenensis*.408015, *Mycobacterium rhodesiae*\_NBB3.710685, *Propionibacterium acnes*\_C1.1234380, *Jonesia denitrificans*\_DSM\_20603.471856, *Corynebacterium ulcerans*\_FRC58.1408268, *Corynebacterium deserti*\_GIMN1.010.931089, *Renibacterium salmoninarum*\_ATCC\_33209.288705, *Corynebacterium maris*\_DSM\_45190.1224163, *Eggerthella*\_sp.\_YY7918.502558, *Bifidobacterium longum*\_subsp.\_infantis\_ATCC\_15697\_\_\_\_JCM\_1222\_\_\_\_DSM\_20088.391904, *Pseudonocardia*\_sp.\_EC080625-04.1096868, *Arthrobacter*\_sp.\_YC-RL1.1652545, *Actinoplanes missouriensis*\_431.512565, *Arthrobacter*\_sp.\_Hiyo8.1588023, *Mycobacterium*\_sp.\_MOTT36Y.1168287, *Corynebacterium halotolerans*\_YIM\_70093\_\_\_\_DSM\_44683.1121362, *Micromonospora aurantiaca*\_ATCC\_27029.644283, *Actinotignum schaalii*.59505, *Kitasatospora setae*\_KM-6054.452652, *Propionibacterium freudenreichii*\_subsp.\_shermanii\_CIRM-BIA1.754252, *Arthrobacter chlorophenolicus*\_A6.452863, *Sanguibacter keddiei*\_DSM\_10542.446469, *Nocardiopsis alba*\_ATCC\_BAA-2165.1205910, *Corynebacterium mustelae*.571915, *Acidothermus cellulolyticus*\_11B.351607, *Scardovia inopinata*\_JCM\_12537.1150468, *Micrococcus luteus*\_NCTC\_2665.465515, *Corynebacterium atypicum*.191610, *Mycobacterium tuberculosis*.1773, *Corynebacterium diphtheriae*\_31A.698962, *Corynebacterium uterequi*.1072256, *Corynebacteriales bacterium*\_X1698.1562462, *Kocuria palustris*.71999, *Streptomyces*\_sp.\_Mg1.465541, *Mycobacterium haemophilum*\_DSM\_44634.1202450, *Modestobacter marinus*.477641, *Kribbella flavida*\_DSM\_17836.479435, *Brachybacterium faecium*\_DSM\_4810.446465, *Rathayibacter toxicus*.145458, *Actinomyces radicidentis*.111015, *Corynebacterium terpenotabidum*\_Y-11.1200352, *Arthrobacter*\_sp.\_Rue61a.1118963, *Coriobacteriaceae bacterium*\_68-1-3.1531429, *Rhodococcus jostii*\_RHA1.101510, *Bifidobacterium coryneforme*.1687, *Cryptobacterium curtum*\_DSM\_15641.469378, *Corynebacterium kroppenstedtii*\_DSM\_44385.645127, *Gordonia*\_sp.\_QH-11.1136941
- 13 *Streptomyces cattleya*\_NRRL\_8057\_\_\_\_DSM\_46488.1003195, *Propionibacterium propionicum*\_F0230a.767029, *Arthrobacter aureus*\_TC1.290340, *Corynebacterium urealyticum*\_DSM\_7109.504474, *Kibdelosporangium phytohabitans*.860235, *Mycobacterium marinum*\_M.216594, *Arthrobacter*\_sp.\_A3.595593, *Brevibacterium flavum*.92706, *Propionibacterium acnes*\_C1.1234380, *Eggerthella lenta*\_DSM\_2243.479437, *Nocardia farcinica*.37329, *Nocardia cyriacigeorgica*\_GUH-2.1127134, *Beutenbergia cavernae*\_DSM\_12333.471853, *Corynebacterium glutamicum*\_R.340322, *Micromonospora aurantiaca*\_ATCC\_27029.644283, *Rhodococcus jostii*\_RHA1.101510, *Rhodococcus pyridinivorans*\_SB3094.1435356, *Scardovia inopinata*\_JCM\_12537.1150468, *Saccharomonospora viridis*\_DSM\_43017.471857, *Streptosporangium roseum*\_DSM\_43021.479432, *Corynebacterium halotolerans*\_YIM\_70093\_\_\_\_DSM\_44683.1121362, *Corynebacterium ulcerans*\_FRC58.1408268, *Verrucospora maris*\_AB-18-032.263358, *Frankia*\_sp.\_Ccl3.106370, *Pseudonocardia*\_sp.\_EC080625-04.1096868, *Mycobacterium*\_sp.\_KMS.189918, *Nocardiopsis alba*\_ATCC\_BAA-2165.1205910, *Microbacterium*\_sp.\_PAMC\_28756.1795053, *Arthrobacter*\_sp.\_ERGS1\_01.1704044, *Bifidobacterium adolescentis*.1680, *Catenulispora acidiphila*\_DSM\_44928.479433, *Trueperella pyogenes*\_TP8.1435056, *Corynebacterium callunae*\_DSM\_20147.1121353, *Devriesea agamarum*.472569, *Leifsonia xyli*\_subsp.\_cynodontis\_DSM\_46306.1389489, *Microbacterium testaceum*\_STLB037.979556, *Rubrobacter radiotolerans*.42256, *Coriobacteriaceae bacterium*\_68-1-3.1531429, *Streptomyces*\_sp.\_PAMC26508.1265601, *Mycobacterium kansasii*\_ATCC\_12478.557599, *Actinobacteria bacterium*\_IMCC26256.1650658, *Renibacterium salmoninarum*\_ATCC\_33209.288705, *Olsenella*\_sp.\_oral\_taxon\_807.712411, *Streptomyces glaucus*.1907, *Mycobacterium fortuitum*.1766, *Rhodoluna lacticola*.529884, *Microbacterium*\_sp.\_CGR1.1696072, *Bifidobacterium dentium*\_JCM\_1195\_\_\_\_DSM\_20436.1150423, *Corynebacterium singulare*.161899, *Adlercreutzia equolifaciens*\_DSM\_19450.1384484, *Mycobacterium intracellulare*\_MOTT-64.1138383, *Streptomyces pristinaespiralis*.38300, *Actinoplanes*\_sp.\_SE50\_110.134676, *Streptomyces*\_sp.\_4F.1751294, *Streptomyces leeuwenhoekii*.1437453, *Mycobacterium*\_sp.\_VKM\_Ac-1817D.1273687, *Actinomyces meyeri*.52773, *Streptomyces reticuli*.1926, *Isophtericola variabilis*.225.743718, *Mycobacterium*\_sp.\_JLS.164757, *Salinispora arenicola*\_CNS-205.391037, *Pseudonocardia*\_sp.\_AL041005-10.445576, *Corynebacterium mustelae*.571915, *Mycobacterium haemophilum*\_DSM\_44634.1202450, *Corynebacterium imitans*.156978, *Streptomyces*\_sp.\_SirexAA-E.862751, *Mycobacterium africanum*.33894, *Mycobacterium*\_sp.\_EPa45.1545728, *Actinoplanes friuliensis*\_DSM\_7358.1246995, *Streptomyces pratensis*\_ATCC\_33331.591167, *Kocuria flava*.446860, *Corynebacterium aurimucosum*\_ATCC\_700975.548476, *Geodermatophilus obscurus*\_DSM\_43160.526225, *Bifidobacterium actinocoloniiforme*\_DSM\_22766.1437605, *Streptomyces*\_sp.\_Mg1.465541, *Streptomyces griseus*\_subsp.\_griseus\_NBRC\_13350.455632, *Arthrobacter sulfonivorans*.121292, *Salinispora tropica*\_CNB-440.369723, *Segniliparus rotundus*\_DSM\_44985.640132, *Streptomyces bingchenggensis*\_BCW-1.749414, *Rhodococcus erythropolis*\_PR4.234621, *Corynebacterium uterequi*.1072256, *Amycolicococcus subflavus*\_DQS3-9A1.443218, *Streptomyces*\_sp.\_CFMR\_7.1649184, *Aeromicrobium erythreum*.2041, *Streptomyces fulvissimus*\_DSM\_40593.1303692
- 14 *Bifidobacterium coryneforme*.1687, *Nocardioides*\_sp.\_JS614.196162, *Bifidobacterium thermophilum*\_RBL67.1254439, *Streptomyces fulvissimus*\_DSM\_40593.1303692, *Streptomyces vietnamensis*.362257, *Arthrobacter*\_sp.\_Hiyo8.1588023, *Propionibacterium propionicum*\_F0230a.767029, *Propionibacterium avidum*\_44067.1170318, *Microbacterium*\_sp.\_No\_7.1714373, *Mycobacterium*\_sp.\_MCS.164756, *Clavibacter michiganensis*\_subsp.\_sepedonicus.31964, *Corynebacterium efficiens*\_YS-314.196164, *Mycobacterium goodii*.134601, *Corynebacterium casei*\_LMG\_S-19264.1285583, *Coriobacteriaceae bacterium*\_68-1-3.1531429, *Corynebacterium kroppenstedtii*\_DSM\_44385.645127, *Conexibacter woesei*\_DSM\_14684.469383, *Microbacterium*\_sp.\_PAMC\_28756.1795053, *Corynebacterium stationis*.1705, *Acidimicrobium ferrooxidans*\_DSM\_10331.525909, *Trueperella pyogenes*\_TP8.1435056, *Actinoplanes friuliensis*\_DSM\_7358.1246995, *Mycobacterium neoaurum*\_VKM\_Ac-1815D.700508, *Arthrobacter chlorophenolicus*\_A6.452863, *Nocardiopsis dassonvillei*\_subsp.\_dassonvillei\_DSM\_43111.446

- 468, *Arthrobacter aureus* TC1.290340, *Ilumatobacter coccineus* YM16-304.1313172, *Arcanobacterium haemolyticum* DSM\_20595.644284, *Corynebacterium* sp. ATCC\_6931.1487956, *Scardovia inopinata* JCM\_12537.1150468, *Luteipulveratus mongoliensis*.571913, *Streptomyces bingchengensis* BCW-1.749414, *Slackia heliotrinireducens* DSM\_20476.471855, *Leifsonia xyli* subsp. *cynodontis* DSM\_46306.1389489, *Microbacterium testaceum* StLB037.979556, *Mycobacterium haemophilum* DSM\_44634.1202450, *Brevibacterium flavum*.92706, *Mycobacterium* sp. JLS.164757, *Corynebacterium aurimucosum* ATCC\_700975.548476, *Renibacterium salmoninarum* ATCC\_33209.288705, *Corynebacterium terpenotabidum* Y-11.1200352, *Rhodoluna laticola*.529884, *Streptomyces pristinaespiralis*.38300, *Streptomyces pratensis* ATCC\_33331.591167, *Corynebacterium marinum* DSM\_44953.1224162, *Microbacterium* sp. CGR1.1696072, *Streptomyces cattleya* NRRL\_8057 DSM\_46488.1003195, *Streptomyces avermitilis* MA-4680 NBRC\_14893.227882, *Streptomyces ambofaciens* ATCC\_23877.278992, *Rhodococcus jostii* RHA1.101510, *Nocardia brasiliensis* ATCC\_700358.1133849, *Xylanimonas cellulositica* DSM\_15894.446471, *Nocardiosis alba* ATCC\_BAA-2165.1205910, *Corynebacterium imitans*.156978, *Microbacterium* sp. XT11.367477, *Pseudonocardia* sp. AL041005-10.445576, *Corynebacterium camporeale*.161896, *Propionibacterium acidipropionici* ATCC\_4875.1171373, *Actinomyces oris*.544580, *Kutzneria alba* DSM\_43870.1449976, *Mycobacterium* sp. VKM\_Ac-1817D.1273687, *Microlunatus phosphovorus* NM-1.1032480, *Streptosporangium roseum* DSM\_43021.479432, *Frankia* sp. EAN1pec.298653, *Streptomyces lydicus* A02.1403539, *Arthrobacter alpinus*.656366, *Corynebacterium atypicum*.191610, *Frankia* sp. Eu1c.298654, *Arthrobacter* sp. ERG S1\_01.1704044, *Mycobacterium* sp. MOTT36Y.1168287, *Amycolatopsis methanolica*.239.1068978, *Rhodococcus erythropolis* PR4.234621, *Eggerthella lenta* DSM\_2243.479437, *Micrococcus luteus* NCTC\_2665.465515, *Corynebacterium pseudotuberculosis*.1719, *Mycobacterium vanbaalenii* PYR-1.350058, *Streptomyces* sp. CdTB01.1725411, *Mycobacterium abscessus* subsp. *bolletii*.50594.1303024, *Streptomyces reticuli*.1926, *Micromonospora* sp. L5.648999, *Corynebacterium humireducens* NBRC\_106098 DSM\_45392.1223515, *Thermomonospora curvata* DSM\_43183.471852, *Mycobacterium liflandii* 128FXT.459424, *Saccharomonospora viridis* DSM\_43017.471857, *Streptomyces albulus* ZPM.1434306, *Amycolatopsis orientalis* HCCB10007.1156913
- 15 *Streptomyces* sp. Mg1.465541, *Bifidobacterium indicum* LMG\_11587 DSM\_20214.1341694, *Mycobacterium marinum* M.216594, *Corynebacterium deserti* GIMN1.010.931089, *Microterricola viridarii*.412690, *Eggerthella lenta* DSM\_2243.479437, *Bifidobacterium coryneforme*.1687, *Mycobacterium* sp. MCS.164756, *Luteipulveratus mongoliensis*.571913, *Adlercreutzia equolifaciens* DSM\_19450.1384484, *Mycobacterium leprae* Br4923.561304, *Arthrobacter* sp. YC-RL1.1652545, *Bifidobacterium dentium* JCM\_1195 DSM\_20436.1150423, *Bifidobacterium animalis* subsp. *lactis* CNC M-1-2494.1042403, *Frankia* sp. Ccl3.106370, *Mycobacterium sinense*.875328, *Corynebacterium epidermidicantis*.1050174, *Mycobacterium ulcerans* Ag99.362242, *Bifidobacterium breve*.1685, *Corynebacterium argenteorotense* DSM\_44202.1348662, *Corynebacterium urealyticum* DSM\_7109.504474, *Arthrobacter* sp. PAMC25486.1494608, *Bifidobacterium pseudocatenulatum* DSM\_20438 JCM\_1200 LMG\_10505.547043, *Eggerthella* sp. YY7918.502558, *Corynebacterium casei* LMG\_S-19264.1285583, *Arthrobacter* sp. ERGS1\_01.1704044, *Propionibacterium acidipropionici* ATCC\_4875.1171373, *Mycobacterium intracellulare* MOTT-64.1138383, *Kitasatospora setae* KM-6054.452652, *Thermobispora bispora* DSM\_43833.469371, *Cellulomonas fimi* ATCC\_484.590998, *Mycobacterium goodii*.134601, *Bifidobacterium catenulatum* DSM\_16992 JCM\_1194 LMG\_11043.566552, *Streptomyces* sp. CFMR\_7.1649184, *Ilumatobacter coccineus* YM16-304.1313172, *Frankia alni* ACN14a.326424, *Pseudonocardia* sp. EC080619-01.1096856, *Mycobacterium* sp. Epa45.1545728, *Streptomyces collinus* Tu\_365.1214242, *Arthrobacter* sp. IHBB\_11108.1618207, *Micrococcus luteus* NCTC\_2665.465515, *Pseudonocardia dioxanivorans* CB1190.675635, *Rathayibacter toxicus*.145458, *Bifidobacterium adolescentis*.1680, *Thermobifida fusca* YX.269800, *Kibdelosporangium phytohabitans*.860235, *Mycobacterium* sp. JS623.212767, *Trueperella pyogenes* TP8.1435056, *Streptomyces* sp. PAMC26508.1265601, *Bifidobacterium asteroides* PRL2011.1147128, *Arthrobacter* sp. Rue61a.1118963, *Arthrobacter alpinus*.656366, *Bifidobacterium angulatum* DSM\_20098 JCM\_7096.518635, *Mycobacterium fortuitum*.1766, *Streptomyces albulus* ZPM.1434306, *Corynebacterium uterequi*.1072256, *Verrucospora maris* AB-18-032.263358, *Mycobacterium abscessus* subsp. *bolletii*.50594.1303024, *Arthrobacter arilaitensis*.256701, *Corynebacterium ureicelerivorans*.401472, *Bifidobacterium bifidum*.1681, *Corynebacterium vitaeruminis* DSM\_20294.1224164, *Streptomyces fulvissimus* DSM\_40593.1303692, *Streptomyces cyaneogriseus* subsp. *noncyanogenus*.477245, *Streptomyces hygroscopicus* subsp. *jinggangensis*.5008.1133850, *Streptomyces vietnamensis*.362257, *Mycobacterium kansasii* ATCC\_12478.557599, *Nocardia nova* SH22a.1415166, *Mycobacterium tuberculosis*.1773, *Mycobacterium neoaurum* VKM\_Ac-1815D.700508, *Streptomyces avermitilis* MA-4680 NBRC\_14893.227882, *Corynebacterium glyciniphilum* AJ\_3170.1404245, *Tropheryma whipplei* str. Twist.203267, *Corynebacterium callunae* DSM\_20147.1121353, *Actinobacteria bacterium* IMCC26256.1650658, *Pseudonocardia* sp. H1130629-09.1641402, *Microbacterium* sp. No\_7.1714373, *Corynebacterium doosanense* CAU\_212 DSM\_45436.558173, *Microbacterium* sp. CGR1.1696072, *Rubrobacter xylanophilus* DSM\_9941.266117, *Mycobacterium haemophilum* DSM\_44634.1202450, *Streptomyces* sp. 769.1262452, *Streptomyces reticuli*.1926, *Streptosporangium roseum* DSM\_43021.479432, *Streptomyces globisporus* C-1027.1172567, *Mycobacterium indicus pranii* MTCC\_9506.1232724
- 16 *Corynebacterium ulcerans* FRC58.1408268, *Mycobacterium bovis* BCG.33892, *Microbacterium testaceum* StLB037.979556, *Brevibacterium flavum*.92706, *Arthrobacter* sp. IHBB\_11108.1618207, *Actinoplanes friuliensis* DSM\_7358.1246995, *Mycobacterium microti*.1806, *Sanguibacter keddiei* DSM\_10542.446469, *Mycobacterium ulcerans* Ag99.362242, *Arthrobacter*

cter\_sp.\_Rue61a.1118963,Streptomyces\_venezuelae.54571,Thermobifida\_fusca\_YX.269800,Propionibacterium\_acidipropionici\_ATCC\_4875.1171373,Salinispora\_tropica\_CNB-440.369723,Rhodococcus\_pyridinivorans\_SB3094.1435356,Streptomyces\_ambofaciens\_ATCC\_23877.278992,Amicycolatopsis\_japonica.208439,Corynebacterium\_stationis.1705,Mycobacterium\_haemophilum\_DSM\_44634.1202450,Dermacoccus\_nishinomiyaensis.1274,Corynebacterium\_argentoratense\_DSM\_44202.1348662,Leifsonia\_xyli\_subsp.\_cynodontis\_DSM\_46306.1389489,Mycobacterium\_intracellulare\_MOTT-64.1138383,Brachybacterium\_faecium\_DSM\_4810.446465,Actinomyces\_sp.\_oral\_taxon\_414.712122,Mycobacterium\_sp.\_EPA45.1545728,Streptomyces\_globisporus\_C-1027.1172567,Jonesia\_dentrificans\_DSM\_20603.471856,Bifidobacterium\_asteroides\_PRL2011.1147128,Gordonia\_polyisoprenivorans\_VH2.1112204,Saccharopolyspora\_erythraea\_NRRL\_2338.405948,Bifidobacterium\_coryneforme.1687,Streptomyces\_pratensis\_ATCC\_33331.591167,Micromonospora\_aurantiaca\_ATCC\_27029.644283,Thermobispora\_bispora\_DSM\_43833.469371,Corynebacterium\_casei\_LMG\_S-19264.1285583,Arthrobacter\_sp.\_Hiyo8.1588023,Corynebacterium\_efficiens\_YS-314.196164,Pseudonocardia\_sp.\_HH130629-09.1641402,Olsenella\_sp.\_oral\_taxon\_807.712411,Microbacterium\_sp.\_PAMC\_28756.1795053,Mycobacterium\_leprae\_Br4923.561304,Amicycolatopsis\_methanolica\_239.1068978,Blastococcus\_saxobsidens\_DD2.1146883,Gardnerella\_vaginalis\_ATCC\_14019.525284,Atopobium\_parvulum\_DSM\_20469.521095,Bifidobacterium\_scandovii\_JCM\_12489\_DSM\_13734.1150461,Rothia\_dentocariosa\_ATCC\_17931.762948,Mycobacterium\_africanum.33894,Mycobacterium\_rhodesiae\_NBB3.710685,Mycobacterium\_sp.\_MOTT36Y.1168287,Kibdelosporangium\_phytohabitans.860235,Corynebacterium\_kroppenstedtii\_DSM\_44385.645127,Tropheryma\_whipplei\_str.\_Twist.203267,Mycobacterium\_vanbaalenii\_PYR-1.350058,Bifidobacterium\_pseudolongum\_PV8-2.1447715,Kutzneria\_albida\_DSM\_43870.1449976,Amicycolatopsis\_orientalis\_HCCB10007.1156913,Cellulomonas\_flavigena\_DSM\_20109.446466,Rhodococcus\_sp.\_B7740.1564114,Corynebacterium\_marinum\_DSM\_44953.1224162,Corynebacterium\_pseudotuberculosis.1719,Mycobacterium\_sp.\_KMS.189918,Corynebacterium\_callunae\_DSM\_20147.1121353,Corynebacterium\_maris\_DSM\_45190.1224163,Streptosporangium\_roseum\_DSM\_43021.479432,Corynebacteriales\_bacterium\_X1698.1562462,Stackebrandtia\_nassauensis\_DSM\_44728.446470,Propionibacterium\_freudenreichii\_subsp.\_shermanii\_CIRM-BIA1.754252,Corynebacterium\_kutscheri.35755,Microbacterium\_sp.\_XT11.367477,Microbacterium\_sp.\_CGR1.1696072,Streptomyces\_pristinaespiralis.38300,Mycobacterium\_chubuense\_NBB4.710421,Rubrobacter\_radiotolerans.42256,Arsenicoccus\_sp.\_oral\_taxon\_190.1658671,Streptomyces\_albus.1888,Pimelobacter\_simplex.2045,Gordonia\_sp.\_QH-11.1136941,Tsakumurella\_paurometabola\_DSM\_20162.521096,Frankia\_symbiont\_of\_Datisca\_glomerata.656024,Corynebacterium\_mustelae.571915,Kytococcus\_sedentarius\_DSM\_20547.478801,Streptomyces\_glaucescens.1907,Microbacterium\_sp.\_No.\_7.1714373,Corynebacterium\_jeikeium\_K411.306537

- 17 Ilumatobacter\_coccineus\_YM16-304.1313172,Kocuria\_flava.446860,Propionibacterium\_propionicum\_F0230a.767029,Coriobacteriaceae\_bacterium\_68-1-3.1531429,Kocuria\_palustris.71999,Corynebacterium\_urealyticum\_DSM\_7109.504474,Actinomyces\_oris.544580,Corynebacterium\_aurimucosum\_ATCC\_700975.548476,Pimelobacter\_simplex.2045,Cellulomonas\_fimi\_ATCC\_484.590998,Streptomyces\_globisporus\_C-1027.1172567,Frankia\_alni\_ACN14a.326424,Frankia\_sp.\_EAN1pec.298653,Segniliparus\_rotundus\_DSM\_44985.640132,Corynebacterium\_pseudotuberculosis.1719,Streptomyces\_ambofaciens\_ATCC\_23877.278992,Streptomyces\_sp.\_CFMR\_7.1649184,Mycobacterium\_rhodesiae\_NBB3.710685,Streptosporangium\_roseum\_DSM\_43021.479432,Corynebacterium\_epidemicum.1050174,Mycobacterium\_aviium\_104.243243,Microterricola\_viridarii.412690,Mycobacterium\_intracellulare\_MOTT-64.1138383,Stackebrandtia\_nassauensis\_DSM\_44728.446470,Mycobacterium\_sp.\_KMS.189918,Mycobacterium\_sp.\_VKM\_Ac-1817D.1273687,Leifsonia\_xyli\_subsp.\_cynodontis\_DSM\_46306.1389489,Sanguibacter\_keddiei\_DSM\_10542.446469,Bifidobacterium\_pseudolongum\_PV8-2.1447715,Mycobacterium\_sinense.875328,Rubrobacter\_radiotolerans.42256,Bifidobacterium\_bifidum.1681,Arthrobacter\_sp.\_ERGS1\_01.1704044,Actinoplanes\_sp.\_SE50\_110.134676,Streptomyces\_griseus\_subsp.\_griseus\_NBRC\_13350.455632,Atopobium\_parvulum\_DSM\_20469.521095,Mycobacterium\_sp.\_JLS.164757,Cryptobacterium\_curtum\_DSM\_15641.469378,Corynebacterium\_humireducens\_NBRC\_106098\_DSM\_45392.1223515,Streptomyces\_sp.\_769.1262452,Arthrobacter\_sp.\_IHBB\_11108.1618207,Aeromicrobium\_erythreum.2041,Corynebacterium\_glutamicum\_R.340322,Microbacterium\_testaceum\_StLB037.979556,Brachybacterium\_faecium\_DSM\_4810.446465,Gordonia\_sp.\_KTR9.337191,Corynebacterium\_ulcerans\_FRC58.1408268,Actinomyces\_sp.\_oral\_taxon\_414.712122,Corynebacteriales\_bacterium\_X1698.1562462,Mycobacterium\_bovis\_BCG.33892,Nakamurella\_multipartita\_DSM\_44233.479431,Microbacterium\_sp.\_CGR1.1696072,Kibdelosporangium\_phytohabitans.860235,Clavibacter\_michiganensis\_subsp.\_sepedonicus.31964,Arthrobacter\_alpinus.656366,Streptomyces\_lydicus\_A02.1403539,Corynebacterium\_ureicelerivorans.401472,Streptomyces\_sp.\_PAMC26508.1265601,Intrasporangium\_calvum\_DSM\_43043.710696,Micromonospora\_aurantiaca\_ATCC\_27029.644283,Amicycolatopsis\_mediterranei\_S699.713604,Corynebacterium\_mustelae.571915,Mycobacterium\_microti.1806,Mycobacterium\_fortuitum.1766,Bifidobacterium\_thermophilum\_RBL67.1254439,Streptomyces\_leeuwenhoekii.1437453,Streptomyces\_sp.\_CdTB01.1725411,Kitasatospora\_setae\_KM-6054.452652,Mycobacterium\_leprae\_Br4923.561304,Coriobacterium\_glomerans\_PW2.700015,Mycobacterium\_kansasii\_ATCC\_12478.557599,Salinispora\_arenicola\_CNS-205.391037,Mobiluncus\_curtisii\_ATCC\_43063.548479,Propionibacterium\_freudenreichii\_subsp.\_shermanii\_CIRM-BIA1.754252,Actinomyces\_meyeri.52773,Thermobispora\_bispora\_DSM\_43833.469371,Streptomyces\_pratensis\_ATCC\_33



- 331.591167, *Arthrobacter\_chlorophenolicus*\_A6.452863, *Mycobacterium\_yongonense*\_05-1390.1138871, *Micrococcus\_phosphovorus*\_NM-1.1032480, *Olsenella\_uli*\_DSM\_7084.633147, *Streptomyces\_scabiei*\_87.22.680198, *Pseudonocardia\_dioxanivorans*\_CB1190.675635, *Streptomyces\_sp.\_CNQ-509.444103*, *Bifidobacterium\_breve*.1685, *Cellulomonas\_gilvus*\_ATCC\_13127.593907
- 18 *Slackia\_heliotrinireducens*\_DSM\_20476.471855, *Corynebacterium\_variabile*\_DSM\_44702.858619, *Mycobacterium\_sp.\_JS62* 3.212767, *Blastococcus\_saxosidens*\_DD2.1146883, *Nocardia\_nova*\_SH22a.1415166, *Geodermatophilus\_obscurus*\_DSM\_43160.526225, *Corynebacterium\_terpenotabidum\_Y-11*.1200352, *Streptomyces\_sp.\_Sirex*AA-E.862751, *Corynebacterium\_atypicum*.191610, *Actinobacteria\_bacterium\_IMCC26256*.1650658, *Eggerthella\_lenta*\_DSM\_2243.479437, *Dermacoccus\_nishinomiyaensis*.1274, *Corynebacterium\_pseudotuberculosis*.1719, *Corynebacterium\_kroppenstedtii*\_DSM\_44385.645127, *Arthrobacter\_aurescens*\_TC1.290340, *Corynebacterium\_maris*\_DSM\_45190.1224163, *Corynebacterium\_uterequi*.1072256, *Streptomyces\_globisporus\_C-1027*.1172567, *Frankia\_sp.\_Ccl3*.106370, *Nocardiosis\_alba*\_ATCC\_BAA-2165.1205910, *Streptomyces\_sp.\_CNQ-509.444103*, *Streptomyces\_venezuelae*.54571, *Pseudonocardia\_dioxanivorans*\_CB1190.675635, *Mycobacterium\_leprae*\_Br4923.561304, *Aeromicrobium\_erythreum*.2041, *Streptomyces\_collinus\_Tu*.365.1214242, *Corynebacterium\_marinum*\_DSM\_44953.1224162, *Arthrobacter\_sp.\_Hiyo8*.1588023, *Rothia\_dentocariosa*\_ATCC\_17931.762948, *Kytococcus\_sedentarius*\_DSM\_20547.478801, *Streptomyces\_scabiei*\_87.22.680198, *Mycobacterium\_bovis*\_BCG.33892, *Pseudonocardia\_sp.\_EC080610-09*.1688404, *Saccharopolyspora\_erythraea\_NRR1*.2338.405948, *Actinoplanes\_sp.\_N902-109*.649831, *Saccharomonospora\_viridis*\_DSM\_43017.471857, *Micrococcus\_phosphovorus*\_NM-1.1032480, *Nocardia\_farcinica*.37329, *Arthrobacter\_chlorophenolicus*\_A6.452863, *Corynebacterium\_glyciniphilum\_AJ*.3170.1404245, *Arthrobacter\_sp.\_LS16*.1690248, *Micromonospora\_aurantiaca*\_ATCC\_27029.644283, *Thermobispora\_bispora*\_DSM\_43833.469371, *Renibacterium\_salmoninarum*\_ATCC\_33209.288705, *Kitasatospora\_setae\_KM-6054*.452652, *Olsenella\_uli*\_DSM\_7084.633147, *Mycobacterium\_haemophilum*\_DSM\_44634.1202450, *Streptomyces\_sp.\_Mg1*.465541, *Mycobacterium\_kansasii*\_ATCC\_12478.557599, *Intrasporangium\_calvum*\_DSM\_43043.710696, *Arthrobacter\_sp.\_FB24*.290399, *Mycobacterium\_africanum*.33894, *Arthrobacter\_arilaitensis*.256701, *Luteipulveratus\_mongoliensis*.571913, *Catenulipora\_acidiphila*\_DSM\_44928.479433, *Actinoplanes\_missouriensis*.431.512565, *Leifsonia\_xyli\_subsp.\_cynodontis\_DS*M\_46306.1389489, *Propionibacterium\_avidum*.44067.1170318, *Arthrobacter\_phenanthrenivorans*\_Sphe3.930171, *Mycobacterium\_chubuense*\_NBB4.710421, *Streptomyces\_pratensis*\_ATCC\_33331.591167, *Frankia\_sp.\_Eul1c*.298654, *Corynebacterium\_resistens*\_DSM\_45100.662755, *Mycobacterium\_vanbaalenii*\_Pyr-1.350058, *Mycobacterium\_sp.\_EPA45*.1545728, *Bifidobacterium\_thermophilum\_RBL67*.1254439, *Eggerthella\_sp.\_YY7918*.502558, *Gordonia\_sp.\_QH-11*.1136941, *Propionibacterium\_acnes\_C1*.1234380, *Actinoplanes\_friuliensis*\_DSM\_7358.1246995, *Propionibacterium\_freudei*\_nreichii\_subsp.\_shermanii\_CIRM-BIA1.754252, *Arthrobacter\_sp.\_YC-R1*.1652545, *Gardnerella\_vaginalis*\_ATCC\_14019.525284, *Bifidobacterium\_pseudolongum\_PV8-2*.1447715, *Olsenella\_sp.\_oral\_taxon\_807*.712411, *Rhodoluna\_lacicola*.529884, *Streptomyces\_cattleia\_NRR1*.8057\_\_\_DSM\_46488.1003195, *Streptomyces\_avermitilis\_MA-4680*\_\_NBRC\_14893.227882, *Nakamurella\_multipartita*\_DSM\_44233.479431, *Arthrobacter\_sp.\_Rue61a*.1118963, *Corynebacterium\_sp.\_ATCC\_6931*.1487956, *Corynebacterium\_stationis*.1705, *Mycobacterium\_rhodesiae*\_NBB3.710685, *Microtheriicola\_viridarii*.412690, *Brachybacterium\_faecium*\_DSM\_4810.446465, *Arthrobacter\_sp.\_ERGS1\_01*.1704044
- 19 *Nocardia\_farcinica*.37329, *Streptomyces\_sp.\_Mg1*.465541, *Mycobacterium\_chubuense*\_NBB4.710421, *Corynebacterium\_pseudotuberculosis*.1719, *Mycobacterium\_aviium*.104.243243, *Corynebacterium\_stationis*.1705, *Streptomyces\_scabiei*\_87.22.680198, *Streptomyces\_pratensis*\_ATCC\_33331.591167, *Bifidobacterium\_thermophilum\_RBL67*.1254439, *Arcanobacterium\_haemolyticum*\_DSM\_20595.644284, *Thermomonospora\_curvata*\_DSM\_43183.471852, *Amycolatopsis\_japonica*.208439, *Corynebacterium\_efficiens*\_YS-314.196164, *Nocardiosis\_dassonvillei\_subsp.\_dassonvillei*\_DSM\_43111.446468, *Frankia\_sp.\_Ccl3*.106370, *Gardnerella\_vaginalis*\_ATCC\_14019.525284, *Corynebacterium\_variabile*\_DSM\_44702.858619, *Verrucospora\_maris\_AB-18*.032.263358, *Bifidobacterium\_kashiwanohense*\_JCM\_15439\_\_\_DSM\_21854.1150460, *Mycobacterium\_indicus\_pranii*\_MTCC\_9506.1232724, *Arthrobacter\_sp.\_Rue61a*.1118963, *Amycolatopsis\_mediterranei*\_S699.713604, *Amycolatopsis\_orientalis\_H*\_CCB10007.1156913, *Kitasatospora\_setae\_KM-6054*.452652, *Corynebacterium\_uterequi*.1072256, *Streptomyces\_xiamenensis*.408015, *Actinomyces\_sp.\_oral\_taxon\_414*.712122, *Bifidobacterium\_scardovii*\_JCM\_12489\_\_\_DSM\_13734.1150461, *Streptomyces\_fulvissimus*\_DSM\_40593.1303692, *Rhodococcus\_opacus\_PD630*.543736, *Saccharomonospora\_viridis*\_DSM\_43017.471857, *Mycobacterium\_abscessus\_subsp.\_boletii*\_50594.1303024, *Bifidobacterium\_actinocoloniiforme*\_DSM\_22766.1437605, *Kocuria\_rhizophila\_DC2201*.378753, *Corynebacterium\_diphtheriae*\_31A.698962, *Streptomyces\_leeuwenhoekii*.1437453, *Corynebacterium\_marinum*\_DSM\_44953.1224162, *Corynebacterium\_atypicum*.191610, *Streptomyces\_bingchenggensis*\_BCW-1.749414, *Streptomyces\_violaceusniger\_Tu*.4113.653045, *Corynebacterium\_sp.\_ATCC\_6931*.1487956, *Saccharopolyspora\_erythraea\_NRR1*.2338.405948, *Mycobacterium\_sp.\_CGR1*.1696072, *Micromonospora\_aurantiaca*\_ATCC\_27029.644283, *Rhodococcus\_pyridinivorans*\_SB3094.1435356, *Catenulipora\_acidiphila*\_DSM\_44928.479433, *Streptomyces\_reticulosus*.1926, *Streptomyces\_sp.\_4F*.1751294, *Thermobifida\_fusca\_YX*.269800, *Mycobacterium\_tuberculosis*.1773, *Corynebacterium\_lactis*\_RW2-5.1408189, *Bifidobacterium\_bifidum*.1681, *Rhodococcus\_erythropolis*\_PR4.234621, *Dermacoccus\_nishinomiyaensis*.1274, *Bifidobacterium\_animalis\_subsp.\_lactis\_CNCM*\_I-2494.1042403, *Streptomyces\_sp.\_CNQ-509*.444103, *Corynebacterium\_argentoratense*\_DSM\_44202.1348662, *Mycobacterium\_goodii*.134601, *Frankia\_alni*\_ACN14a.326424, *Leifsonia\_xyli\_subsp.\_cynodontis*\_DSM\_46306.1389489, *Slackia\_heliotrinireducens*\_DSM\_20476.471855, *Corynebacterium*

cterium\_maris\_DSM\_45190.1224163,Corynebacterium\_testudinoris.136857,Corynebacterium\_mustelae.571915,Nocardia\_brasiliensis\_ATCC\_700358.1133849,Aeromicrobium\_erythreum.2041,Rothia\_dentocariosa\_ATCC\_17931.762948,Mycobacterium\_kansasii\_ATCC\_12478.557599,Corynebacteriales\_bacterium\_X1036.1528099,Blastococcus\_saxobsidens\_DD2.1146883,Bifidobacterium\_asteroides\_PRL2011.1147128,Corynebacterium\_terpenotabidum\_Y-11.1200352,Actinomyces\_meyeri.52773,Atopobium\_parvulum\_DSM\_20469.521095,Brachybacterium\_faecium\_DSM\_4810.446465,Nocardia\_cyriacigeorgica\_GUH-2.1127134,Bifidobacterium\_breve.1685,Arsenicicoccus\_sp.\_oral\_taxon\_190.1658671,Rubrobacter\_xylanophilus\_DSM\_9941.266117,Micromonospora\_sp.\_L5.648999,Rhodococcus\_sp.\_B7740.1564114,Nocardia\_nova\_SH22a.1415166,Bifidobacterium\_dentium\_JCM\_1195\_DSM\_20436.1150423,Streptomyces\_vietnamensis.362257,Mycobacterium\_sp.\_MOTT36Y.1168287,Gordonia\_bronchialis\_DSM\_43247.526226

20

21 **Table S27** Normalized Robinson-Foulds (nRF) matrix for Deinococcus-Thermus (DT) permutations on Hug *et al.* (2016) dataset.  
22 Normalizing constant shown top left. Dcc.: Deinococcus, Th.: Thermus.

| 6150  |                              | FULL    | HIGH1   | HIGH2   | HIGH3   | HIGH4   | HIGH5   | HIGH6   | MD1     | MD2     | LOW1    | LOW2    | LOW3    | LOW4    | LOW5    | LOW6    |
|-------|------------------------------|---------|---------|---------|---------|---------|---------|---------|---------|---------|---------|---------|---------|---------|---------|---------|
| FULL  | all                          | 0       | 0.02732 | 0.0452  | 0.04293 | 0.03317 | 0.03415 | 0.02959 | 0.03642 | 0.04098 | 0.02504 | 0.0348  | 0.02959 | 0.03154 | 0.02699 | 0.03447 |
| HIGH1 | Dcc. Geothermalls            | 0.02732 | 0       | 0.04    | 0.03154 | 0.01008 | 0.04    | 0.0374  | 0.04    | 0.03902 | 0.02407 | 0.04195 | 0.02211 | 0.03837 | 0.01659 | 0.02472 |
| HIGH2 | Truepera                     | 0.0452  | 0.04    | 0       | 0.03024 | 0.03837 | 0.03707 | 0.0348  | 0.04618 | 0.02732 | 0.04553 | 0.05073 | 0.0439  | 0.04033 | 0.04    | 0.0413  |
| HIGH3 | Marinithermus hydrothermalis | 0.04293 | 0.03154 | 0.03024 | 0       | 0.03089 | 0.02602 | 0.02407 | 0.0348  | 0.02537 | 0.03545 | 0.05659 | 0.02374 | 0.04976 | 0.02732 | 0.03935 |
| HIGH4 | Meiothermus ruber            | 0.03317 | 0.01008 | 0.03837 | 0.03089 | 0       | 0.0439  | 0.0413  | 0.03707 | 0.03642 | 0.02699 | 0.0439  | 0.01919 | 0.03935 | 0.01756 | 0.02732 |
| HIGH5 | Oceanithermus profundus      | 0.03415 | 0.04    | 0.03707 | 0.02602 | 0.0439  | 0       | 0.0065  | 0.03252 | 0.03317 | 0.03447 | 0.05431 | 0.03935 | 0.04846 | 0.03707 | 0.04553 |
| HIGH6 | Th. Oshimai                  | 0.02959 | 0.0374  | 0.0348  | 0.02407 | 0.0413  | 0.0065  | 0       | 0.03089 | 0.03057 | 0.0322  | 0.05333 | 0.03707 | 0.04748 | 0.03447 | 0.04293 |
| MD1   | Dcc.                         | 0.03642 | 0.04    | 0.04618 | 0.0348  | 0.03707 | 0.03252 | 0.03089 | 0       | 0.0413  | 0.03122 | 0.04878 | 0.0335  | 0.04325 | 0.03545 | 0.03935 |
| MD2   | Th.                          | 0.04098 | 0.03902 | 0.02732 | 0.02537 | 0.03642 | 0.03317 | 0.03057 | 0.0413  | 0       | 0.04033 | 0.05431 | 0.0374  | 0.04911 | 0.03707 | 0.0478  |
| LOW1  | Dcc. Geothermalls            | 0.02504 | 0.02407 | 0.04553 | 0.03545 | 0.02699 | 0.03447 | 0.0322  | 0.03122 | 0.04033 | 0       | 0.03967 | 0.02439 | 0.03057 | 0.02244 | 0.02959 |
| LOW2  | Truepera                     | 0.0348  | 0.04195 | 0.05073 | 0.05659 | 0.0439  | 0.05431 | 0.05333 | 0.04878 | 0.05431 | 0.03967 | 0       | 0.04195 | 0.02829 | 0.04325 | 0.03642 |
| LOW3  | Marinithermus hydrothermalis | 0.02959 | 0.02211 | 0.0439  | 0.02374 | 0.01919 | 0.03935 | 0.03707 | 0.0335  | 0.0374  | 0.02439 | 0.04195 | 0       | 0.03772 | 0.01691 | 0.02504 |
| LOW4  | Meiothermus ruber            | 0.03154 | 0.03837 | 0.04033 | 0.04976 | 0.03935 | 0.04846 | 0.04748 | 0.04325 | 0.04911 | 0.03057 | 0.02829 | 0.03772 | 0       | 0.0387  | 0.02602 |
| LOW5  | Oceanithermus profundus      | 0.02699 | 0.01659 | 0.04    | 0.02732 | 0.01756 | 0.03707 | 0.03447 | 0.03545 | 0.03707 | 0.02244 | 0.04325 | 0.01691 | 0.0387  | 0       | 0.02634 |
| LOW6  | Th. Oshimai                  | 0.03447 | 0.02472 | 0.0413  | 0.03935 | 0.02732 | 0.04553 | 0.04293 | 0.03935 | 0.0478  | 0.02959 | 0.03642 | 0.02504 | 0.02602 | 0.02634 | 0       |

23

24 **Table S28** Normalized Robinson-Foulds (nRF) matrix for Deinococcus-Thermus (DT) permutations using 6 species from Hug *et al.*  
25 (2016) dataset. Normalizing constant shown top left. Dcc.: Deinococcus, Th.: Thermus.

| 1488  |                              | FULL    | HIGH1   | HIGH2   | HIGH3   | HIGH4   | HIGH5   | HIGH6   | MD1     | MD2     | LOW1    | LOW2    | LOW3    | LOW4    | LOW5    | LOW6    |
|-------|------------------------------|---------|---------|---------|---------|---------|---------|---------|---------|---------|---------|---------|---------|---------|---------|---------|
| FULL  | all                          | 0       | 0.0121  | 0.00269 | 0.00134 | 0       | 0.00269 | 0.00134 | 0.00403 | 0.00403 | 0.00403 | 0.00403 | 0.00269 | 0.00403 | 0.00269 | 0.00269 |
| HIGH1 | Dcc. Geothermalls            | 0.0121  | 0       | 0.0121  | 0.01344 | 0.0121  | 0.0121  | 0.01344 | 0.01478 | 0.01075 | 0.01478 | 0.01478 | 0.0121  | 0.01075 | 0.0121  | 0.0121  |
| HIGH2 | Truepera                     | 0.00269 | 0.0121  | 0       | 0.00134 | 0.00269 | 0       | 0.00134 | 0.00269 | 0.00134 | 0.00269 | 0.00269 | 0       | 0.00134 | 0       | 0       |
| HIGH3 | Marinithermus hydrothermalis | 0.00134 | 0.01344 | 0.00134 | 0       | 0.00134 | 0       | 0.00269 | 0.00269 | 0.00269 | 0.00269 | 0.00269 | 0.00134 | 0.00269 | 0.00134 | 0.00134 |
| HIGH4 | Meiothermus ruber            | 0       | 0.0121  | 0.00269 | 0.00134 | 0       | 0.00269 | 0.00134 | 0.00403 | 0.00403 | 0.00403 | 0.00403 | 0.00269 | 0.00403 | 0.00269 | 0.00269 |
| HIGH5 | Oceanithermus profundus      | 0.00269 | 0.0121  | 0       | 0.00134 | 0.00269 | 0       | 0.00134 | 0.00269 | 0.00134 | 0.00269 | 0.00269 | 0       | 0.00134 | 0       | 0       |
| HIGH6 | Th. Oshimai                  | 0.00134 | 0.01344 | 0.00134 | 0       | 0.00134 | 0.00134 | 0       | 0.00269 | 0.00269 | 0.00269 | 0.00269 | 0.00134 | 0.00269 | 0.00134 | 0.00134 |
| MD1   | Dcc.                         | 0.00403 | 0.01478 | 0.00269 | 0.00269 | 0.00403 | 0.00269 | 0.00269 | 0       | 0.00403 | 0       | 0       | 0.00269 | 0.00403 | 0.00269 | 0.00269 |
| MD2   | Th.                          | 0.00403 | 0.01075 | 0.00134 | 0.00269 | 0.00403 | 0.00134 | 0.00269 | 0.00403 | 0       | 0.00403 | 0.00403 | 0.00134 | 0       | 0.00134 | 0.00134 |
| LOW1  | Dcc. Geothermalls            | 0.00403 | 0.01478 | 0.00269 | 0.00269 | 0.00403 | 0.00269 | 0.00269 | 0       | 0.00403 | 0       | 0       | 0.00269 | 0.00403 | 0.00269 | 0.00269 |
| LOW2  | Truepera                     | 0.00403 | 0.01478 | 0.00269 | 0.00269 | 0.00403 | 0.00269 | 0.00269 | 0       | 0.00403 | 0       | 0       | 0.00269 | 0.00403 | 0.00269 | 0.00269 |
| LOW3  | Marinithermus hydrothermalis | 0.00269 | 0.0121  | 0       | 0.00134 | 0.00269 | 0       | 0.00134 | 0.00269 | 0.00134 | 0.00269 | 0.00269 | 0       | 0.00134 | 0       | 0       |
| LOW4  | Meiothermus ruber            | 0.00403 | 0.01075 | 0.00134 | 0.00269 | 0.00403 | 0.00134 | 0.00269 | 0.00403 | 0       | 0.00403 | 0.00403 | 0.00134 | 0       | 0.00134 | 0.00134 |
| LOW5  | Oceanithermus profundus      | 0.00269 | 0.0121  | 0       | 0.00134 | 0.00269 | 0       | 0.00134 | 0.00269 | 0.00134 | 0.00269 | 0.00269 | 0       | 0.00134 | 0       | 0       |
| LOW6  | Th. Oshimai                  | 0.00269 | 0.0121  | 0       | 0.00134 | 0.00269 | 0       | 0.00134 | 0.00269 | 0.00134 | 0.00269 | 0.00269 | 0       | 0.00134 | 0       | 0       |

26

27

#### 4. References

- Darriba, D., et al. (2011) ProtTest 3: fast selection of best-fit models of protein evolution. *Bioinformatics*, 27,1164-1165.
- Edgar, R.C. (2004) MUSCLE: multiple sequence alignment with high accuracy and high throughput. *Nucl Acids Res*, 32, 1792–1797.
- Lechner, M. et al. (2011) Proteinortho: Detection of (Co-)orthologs in large-scale analysis. *BMC Bioinformatics*, 12,124.
- Lees, J.A., et al. (2018). Evaluation of phylogenetic reconstruction methods using bacterial whole genomes: a simulation based study. *Wellcome open research*, 3.
- Li Li, et al. (2003) OrthoMCL: Identification of ortholog groups for eukaryotic genomes. *Genome Res*, 13, 2178-2189.
- Liu, K., et al (2011). RAXML and FastTree: comparing two methods for large-scale maximum likelihood phylogeny estimation. *PLoS one*, 6, e27731.
- Nguyen, L.T., et al. (2014) IQ-TREE: a fast and effective stochastic algorithm for estimating maximum-likelihood phylogenies. *Molecular biology and evolution*, 32(1), 268-274
- Parks, D.H., et al. (2018) A standardized bacterial taxonomy based on genome phylogeny substantially revises the tree of life. *Nature biotechnology*.
- Philippe, H., et al. (2011) Resolving difficult phylogenetic questions: why more sequences are not enough. *PLoS biology*, 9(3), e1000602.
- Price, M.N., et al. (2010) FastTree 2 -- Approximately maximum-likelihood trees for large alignments. *PLoS ONE*, 5, e9490.
- Reddy, S., et al. (2017) Why do phylogenomic data sets yield conflicting trees? Data type influences the avian tree of life more than taxon sampling. *Systematic biology*, 66(5), pp.857-879.
- Som, A. (2014) Causes, consequences and solutions of phylogenetic incongruence. *Briefings in Bioinformatics*, 16, 536-548.
- Stamatakis, A. (2006) RAXML-VI-HPC: maximum likelihood-based phylogenetic analyses with thousands of taxa and mixed models. *Bioinformatics*, 22, 2688–2690.
- Zhou, X., et al (2017). Evaluating Fast Maximum Likelihood-Based Phylogenetic Programs Using Empirical Phylogenomic Data Sets. *MBE*, 35, 486-5
